# Supplementary material for: Scaling morphogen gradients during tissue growth by a cell division rule
Source: Oxford University Press journal article supplement (doi:10.1242/dev.107011), 2014-05-06
Supplement: dev107011_supp.pdf [file dev107011_supp.pdf]

# SCALING MORPHOGEN PATTERN WITH TISSUE SIZE IN THE ABSENCE OF GLOBAL FEEDBACKS (SUPPORTING INFORMATION)

## 1. MATHEMATICAL FRAMEWORK.

We consider a one-dimensional growing tissue  $[0, L(t)]$ . The domain growth is modeled with a flow type growth law given by,

$$(1) \quad \begin{aligned} \frac{dx(t)}{dt} &= u(x(t), t), \quad \forall x \in [0, L(t)] \quad t > 0, \\ x(0) &= Y. \end{aligned}$$

Here,  $u$  is the (local) flow rate of the growing tissue.

As growth is on account of cell division (we ignore the changes in cell shape and cell movement in this study), the cell proliferation rate (rate at which the cell divides) is given by

$$u_x = \frac{du}{dx}.$$

Now consider any infinitesimal length element  $[x_1, x_2]$  with  $|x_2 - x_1| \ll 1$ . As (1) holds, we have

$$(2) \quad \begin{aligned} \frac{dx_1(t)}{dt} &= u(x_1, t), \\ x_1(0) &= Y_1, \end{aligned}$$

and

$$(3) \quad \begin{aligned} \frac{dx_2(t)}{dt} &= u(x_2, t), \\ x_2(0) &= Y_2, \end{aligned}$$

Subtracting (2) from (3), we obtain,

$$\begin{aligned} \frac{d(x_2 - x_1)}{dt} &= u(x_2, t) - u(x_1, t), \\ \text{as } |x_2 - x_1| \ll 1 \quad \Rightarrow \quad \frac{d(x_2 - x_1)}{dt} &\approx u_x(x_1, t)(x_2 - x_1) \\ (x_2 - x_1)(0) &= Y_2 - Y_1, \end{aligned}$$

Solving the above ordinary differential equation leads to an infinitesimal length element that evolves (in time) as,

$$(4) \quad (x_2 - x_1)(t) \approx (Y_2 - Y_1) e^{\int_0^t u_x(x_1, s) ds}.$$

As proliferation is on account of cell division, any infinitesimal tissue element doubles in size within the *cell cycle life time* i.e, the amount it takes for a cell to divide into two. Denoting the cell cycle time as  $\tau$ , we observe from (4) that the length element  $[Y_1, Y_2]$  doubling its size in time  $\tau$  implies,

$$\begin{aligned} 2(Y_2 - Y_1) &\approx (Y_2 - Y_1)e^{\int_0^\tau u_x(x_1, s)ds} \\ \Rightarrow \ln(2) &\approx \int_0^\tau u_x(x_1, s)ds \approx u_x(x_1, t)\tau \\ \Rightarrow u_x(x_1, t) &\approx \frac{\ln(2)}{\tau(x_1, t)}. \end{aligned}$$

As  $x_1$  is any point in  $[0, L]$ , we can replace it with  $x$  and obtain Eq. 1 in the main text. Note that we have assumed that the proliferation rate  $u_x$  does not change (by much) during the cell cycle in the above derivation.

**1.1. Governing equations.** Given the above growth model, the rate of change of morphogen concentration  $M(x, t)$  in a growing domain (with expander-dependent degradation) is

$$\frac{d}{dt} \int_{\delta_1(t)}^{\delta_2(t)} M(x, t) dx = \nu(\delta_2(t), t) - \nu(\delta_1(t), t) - \int_{\delta_1(t)}^{\delta_2(t)} \alpha(E) M(x, t) dx,$$

for any infinitesimal length element  $(\delta_1(t), \delta_2(t))$ . Here  $\nu = D_M(E)M_x$  represents the flux on account of diffusion of the morphogen and  $\alpha(E)$  is the morphogen degradation. Both the diffusion and the degradation rates can depend on the expander  $E$ . Using the Reynolds theorem [1] and the growth condition (1), we obtain the morphogen evolution equation,

$$(5) \quad M_t = D_M(E)M_{xx} - \alpha(E)M - uM_x - u_x M, \quad (x, t) \in [0, L(t)] \times [0, T].$$

Here,  $u$  is the flow rate from (1). The above equation is a advection-reaction-diffusion equation, that has to be supplemented with suitable initial and boundary conditions.

Similarly, the rate of change of expander concentration  $E(x, t)$  in a growing domain is given by,

$$\frac{d}{dt} \int_{\delta_1(t)}^{\delta_2(t)} E(x, t) dx = \mu(\delta_2(t), t) - \mu(\delta_1(t), t) - \int_{\delta_1(t)}^{\delta_2(t)} \alpha_E E(x, t) dx + \int_{\delta_1(t)}^{\delta_2(t)} \beta_E h(M(x, t)) dx,$$

for any infinitesimal length element  $(\delta_1(t), \delta_2(t))$ . Here  $\mu = D_E E_x$  represents the flux on account of diffusion of the expander. The degradation rate  $\alpha_E$  is constant as is the rate of optimal expander concentration  $\beta_E$  and the source (production) function  $h$  depends on the Morphogen concentration  $M$ . Using the Reynolds theorem [1] and the growth condition (1), we obtain the

morphogen evolution equation,

$$(6) \quad E_t = D_E E_{xx} - \alpha_E E - u E_x - u_x E + \beta_E h(M), \quad (x, t) \in [0, L(t)] \times [0, T].$$

This establishes the derivation of morphogen and expander evolution equations 2(a) and 2(b) in the text.

For the rest of the paper, we assume that the expander only limits morphogen degradation. Hence, the morphogen diffusion rate  $D_M(E) \equiv D_M$  and the expander dependent morphogen degradation rate is

$$\alpha(E) = \frac{\alpha_M}{1 + \frac{E}{E_c}}, \quad E_c \equiv 1.$$

The morphogen dependent expander repression is

$$h(M) = \frac{T_{rep}^n}{T_{rep}^n + M^n},$$

Here,  $n \gg 1$  is the Hill coefficient. We remark that in the limit of  $n \rightarrow \infty$ , the Hill function converges to the indicator function,

$$(7) \quad h(M) = \mathbb{I}_{\mathcal{P}} = \begin{cases} 1 & \text{if } x \in \mathcal{P}, \\ 0 & \text{otherwise.} \end{cases}$$

with  $T_{rep}$  being the threshold of repression of the expander by the morphogen and  $\mathcal{P}$  being the expander expression domain:

$$(8) \quad \mathcal{P}(t) = \{x \in [0, L(t)] : M(x, t) \leq T_{rep}\}, \quad P(t) = \text{Length}(\mathcal{P}(t)).$$

For the rest of the analytical results section, we assume that the Hill coefficient  $n \gg 1$  and use the above approximation for the repression function.

## 2. ANALYTICAL SOLUTION PROPERTIES IN THE ABSENCE OF THE EXPANDER

Motivated by the numerical results presented in the main text (figure 3) that scaling, uniform growth and a finite final tissue size can emerge directly from the coupling of the morphogen patterning to the experimentally observed growth law Eq. 3 of the main text even in the absence of the expander, we analyze the morphogen evolution equation (5) in the absence of the expander  $E$ . To do so, we set  $E = 0$  in the morphogen evolution equation (5) to obtain:

$$(9) \quad M_t = D_M M_{xx} - \alpha_M M - u M_x - u_x M, \quad (x, t) \in [0, L(t)] \times [0, T].$$

Our aim is to solve the morphogen evolution equation (9) analytically under biologically reasonable hypothesis. To do so, we first establish a series of desirable properties of the solution.

**2.1. Scaling leads to a finite final tissue size.** The most desirable property that we require of the morphogen profile is that it scales with the growing tissue. For constant morphogen boundary conditions at the edge  $x = 0$ , the relevant notion of scaling is that the morphogen concentration depends only on the relative cellular position  $\xi = \frac{x}{L(t)}$  leading to

$$(10) \quad M(x, t) = M(\xi) = M\left(\frac{x}{L(t)}\right).$$

Similarly, when the morphogen flux is set to constant on the proximal boundary, the relevant notion is normalized scaling i.e.,

$$(11) \quad M(x, t) = M(0, t)\widehat{M}(\xi) = M(0, t)\widehat{M}\left(\frac{x}{\omega L(t)}\right),$$

Since we have flux boundary conditions at the proximal boundary, the above equation implies

$$\begin{aligned} D_M M_x(0) &= \eta, \\ \Rightarrow \frac{D_M M(0, t)\widehat{M}'(0)}{\omega L(t)} &= \eta. \end{aligned}$$

As  $\widehat{M}'(0)$  is a constant, the above expression yields,

$$(12) \quad M(0, t) = \frac{C\omega\eta}{D_M}L(t) = \bar{m}L(t), \quad \text{with} \quad \bar{m} = \frac{C\omega\eta}{D_M}.$$

Thus, we require that the morphogen width scales with size but the amplitude of the morphogen can increase linearly with tissue size. In this section, we assume that the (normalized) morphogen profile scales and derive several interesting consequences of this assumption.

First, we show that under the assumption of scaling and other biologically reasonable assumptions, the tissue has to attain a finite final size. The precise result is stated in the form of the following lemma,

**Lemma 2.1.** *Let  $M$  be a solution of (9) with the following assumptions,*

- (i.) *Constant flux boundary conditions on the proximal boundary i.e.,*

$$(13) \quad D_M M_x(0, t) = \eta, \quad \eta < 0.$$

- (ii.) *The (normalized) morphogen profile scales, i.e it satisfies (11)*  
 (iii.) *There exists a time  $t^* > 0$  such that for all  $t > t^*$ , there exists a relative position  $L^*(t) = CL(t)$  and some (possibly very small) amount of morphogen in a part of the tissue  $[0, L^*]$  i.e, there exists an  $\epsilon > 0$  (possibly very small) such that*

$$(14) \quad M(x, t) \geq \epsilon, \quad \forall x \in [0, L^*(t)], \quad t > t^*.$$

*This assumption corresponds to requiring that there is at least a part of the tissue that contains a minimal amount of morphogen after scaling commences at time  $t = t^*$ .*

- (iv.) *The tissue growth is always non-negative i.e,  $u \geq 0$ .*

(v.) *The morphogen concentration forms a gradient i.e.,  $\widehat{M}'(\xi) \leq 0$ .*

*Then, the size of the tissue at any time is finite.*

**Proof.** First, we observe that scaling (11) implies

$$(15) \quad M_t = \bar{m}L'(t) \left( \widehat{M} - \widehat{M}'(\xi)\xi \right) \geq 0,$$

as the morphogen concentration and growth are always non-negative, the gradient is non-increasing and relative position  $\xi \in [0, 1]$ .

Next, for any time  $t > t^*$ , we integrate the evolution equation (9) over  $[0, L^*(t)]$  to obtain using the fundamental theorem of calculus that,

$$\begin{aligned} \int_0^{L^*(t)} M_t dx &= D_M \int_0^{L^*(t)} M_{xx} dx - \alpha_M \int_0^{L^*(t)} M dx - \int_0^{L^*(t)} (uM)_x dx, \\ &= D_M M_x(L^*(t), t) - D_M M_x(0, t) - \alpha_M \int_0^{L^*(t)} M dx \\ &\quad - u(L(t), t)M(L(t), t) + u(0, t)M(0, t) \\ &\leq -\eta - \alpha_M \int_0^{L^*(t)} M dx - u(L(t), t)M(L(t), t), \\ &\leq -\eta - \alpha_M \int_0^{L^*(t)} M dx \end{aligned}$$

In the above, we have used boundary conditions (13), the scaling assumption (11) and the non-decreasing gradient assumption v. and the fact that  $u(0) = 0$  and growth and morphogen concentration are always non-negative. From the above and (14), we obtain

$$\begin{aligned} 0 &\leq \int_0^{L^*(t)} M_t dx \leq -\eta - \alpha_M \int_0^{L^*(t)} M dx \\ \Rightarrow 0 &\leq -\eta - \alpha_M L^*(t)\epsilon \\ (16) \quad &\Rightarrow L^*(t) \leq \frac{-\eta}{\alpha_M \epsilon} \\ &\Rightarrow L(t) \leq \frac{-\eta}{C\alpha_M \epsilon} \end{aligned}$$

Noting that  $\eta < 0$ , the above equation clearly shows that  $L(t)$  is finite for any time  $t$ .

Similar results hold for constant morphogen boundary conditions also.

**Remark.** Given our assumption that cell proliferation drives growth, infinite growth can happen in finite time if the proliferation rate becomes infinite. However, the above argument clearly shows that the cell proliferation rate (defined by our model) remains finite for all time. This is completely consistent with biologically realistic scenarios.

**2.2. Finite final size implies exponentially decay morphogen gradients and uniform growth.** Once the tissue attains a finite final size, clearly  $u, u_x \equiv 0$  and the equation will converge to a steady state. The steady solution of (5) with flux boundary conditions is given by,

$$(17) \quad M_{st}(x) = CL_f e^{-\frac{x}{\lambda L_f}},$$

for some constant  $C$  (determined from the boundary conditions) and for some  $\lambda$  that needs to be determined. Here,  $L_f$  is the final tissue size (also to be determined). As the solution scales throughout the dynamics (at least after an initial transient), it is reasonable to assume from the shape of the solution at steady state (19) that the unsteady solution is also a exponentially decaying morphogen profile:

$$(18) \quad M(x, t) = \bar{m}L(t)e^{-\frac{x}{\lambda L(t)}},$$

with the same  $C, \lambda$  as in (19) and with  $L(t)$  being the length of the tissue at time  $t$ . The solution for constant morphogen boundary conditions can be determined analogously.

Given the solution (18), we plug it in (5) to obtain,

$$(19) \quad \frac{L'(t)}{L(t)} + \frac{xL'}{\lambda L^2} = D_M \left( \frac{1}{\lambda L} \right)^2 - \alpha_M - u_x + u \frac{1}{\lambda L}.$$

Differentiating the above equation by  $x$  we get

$$(20) \quad u_{xx} = \frac{1}{\lambda L} u_x - \frac{1}{\lambda L} \frac{L'}{L}$$

The general solution for the above equation is ,

$$(21) \quad u_x = a(t)e^{\frac{x}{\lambda L}} + \frac{\dot{L}}{L}$$

Integrating again over  $x$  we get

$$(22) \quad u = a(t)\lambda L e^{\frac{x}{\lambda L}} + x \frac{L'}{L} + b(t)$$

From the definition of  $u$  (1), we obtain the boundary conditions are  $u(x = 0) = 0$ ,  $u(x = L) = L'(t)$ . Substituting, we get that  $a(t) = 0$ , and therefore  $u_{xx} = 0$  and  $u_x$  is independent of space, i.e. growth is uniform. Note that the above argument employs a general solution of the equation (20) and this solution cannot be uniquely determined due to the presence of time-dependent coefficients  $a, b$ . However, the assertion that growth is uniform is still valid as the coefficients in (20) are independent of the space variable.

**2.3. Explicit solutions for scaled morphogen profiles.** We have shown that scaling can imply uniform growth. Consequently,

$$(23) \quad x(t) = Yg(t).$$

Here,  $g(t)$  is the time dependent uniform growth rate. From (1), we observe that for uniform growth,

$$\begin{aligned}\frac{dx(t)}{dt} &= Y\dot{g}(t), \\ &= x(t)\frac{\dot{g}(t)}{g(t)} = x(t)\frac{\dot{L}(t)}{L(t)}, \quad \text{as } L(t) = L_0g(t) \\ g(0) &= 1.\end{aligned}$$

Hence,

$$(24) \quad u(x, t) = \frac{x\dot{L}(t)}{L(t)}.$$

Substituting the above form of the flow rate  $u$  into the evolution equation (9), we obtain the morphogen evolution (in growing coordinates) for a uniformly growing tissue:

$$(25) \quad M_t + x\frac{\dot{L}(t)}{L(t)}M_x = D_M M_{xx} - \alpha_M M - \frac{\dot{L}(t)}{L(t)}M,$$

If we assume normalized scaling (11), we show above that we obtain uniform growth (23). Consequently,

$$(26) \quad \begin{aligned}M_t + \frac{x\dot{L}}{L}M_x &= \frac{\dot{L}}{L}M - \frac{x\dot{L}}{L^2}\widehat{M}'(\xi) + \frac{x\dot{L}}{L^2}\widehat{M}'(\xi) \\ &= \frac{\dot{L}}{L}M,\end{aligned}$$

Substituting the above into the morphogen evolution equation (25), we obtain

$$(27) \quad \frac{\widehat{M}''(\xi)}{\widehat{M}(\xi)} = \frac{\omega^2}{D_M} \left( 2L(t)\dot{L}(t) + \alpha_M L(t)^2 \right).$$

The left hand side of the above equation (27) depends only on the relative position  $\xi$  and the right hand side depends only on the time variable. The equality of these terms implies that both the left and right hand sides have to be equal for all values i.e, for some constant  $\bar{\lambda}$ , we have

$$(28) \quad \frac{\widehat{M}''(\xi)}{\widehat{M}(\xi)} = \frac{1}{\bar{\lambda}^2},$$

and

$$(29) \quad \frac{\omega^2}{D_M} \left( 2L(t)\dot{L}(t) + \alpha_M L(t)^2 \right) = \frac{1}{\bar{\lambda}^2}.$$

By setting  $\lambda = \omega\bar{\lambda}$ , we can solve the ODEs (28) and (29) explicitly and obtain the analytical solutions

$$\begin{aligned}
 (30) \quad M(x, t) &= \bar{m}L(t)e^{\frac{-x}{\bar{\lambda}L(t)}} \\
 L(t) &= \sqrt{L_f^2(1 - e^{-\alpha_M t}) + L_0^2 e^{-\alpha_M t}}, \\
 L_f &= \frac{1}{\bar{\lambda}} \sqrt{\frac{D_M}{\alpha_M}},
 \end{aligned}$$

Thus recovering the explicit solution Eq.5, Eq.6 in the main text. Note that  $L_f$  is the final tissue size in this case.

**Remark.** An alternative derivation of the solution formulas (30) can be performed by using the scaled exponential ansatz (18) into (19). However, this derivation requires an a priori assumption of an exponentially decaying gradient. On the other hand, our derivation, as presented above, only requires the assumptions of scaling and uniform growth and derives an exponentially decaying gradient as a consequence of these assumptions.

For the case of point boundary conditions i.e, when the level of morphogen at the proximal boundary is kept constant, we substitute the perfectly scaled solution profile (10) into (58), and obtain

$$(31) \quad \frac{M''(\xi)}{M(\xi)} = \frac{\omega^2}{D_M} \left( L(t)\dot{L}(t) + \alpha_M L(t)^2 \right).$$

The left hand side of the above equation (31) depends only on the relative position  $\xi$  and the right hand side depends only on the time variable. The equality of these terms implies that both the left and right hand sides have to be equal for all values i.e, for some constant  $\bar{\lambda}$ , we have

$$(32) \quad \frac{M''(\xi)}{M(\xi)} = \frac{1}{\bar{\lambda}^2},$$

and

$$(33) \quad \frac{\omega^2}{D_M} \left( L(t)\dot{L}(t) + \alpha L(t)^2 \right) = \frac{1}{\bar{\lambda}^2}$$

We can solve the ODEs (32) and (33) explicitly and obtain the analytical solutions

$$\begin{aligned}
 (34) \quad M(x, t) &= M_0 e^{\frac{-x}{\bar{\lambda}L(t)}} \\
 L(t) &= \sqrt{L_f^2(1 - e^{-2\alpha t}) + L_0^2 e^{-2\alpha t}}, \\
 L_f &= \frac{1}{\bar{\lambda}} \sqrt{\frac{D_M}{\alpha_M}},
 \end{aligned}$$

**Remark.** In both sets of explicit solutions, (30) for constant flux boundary conditions and (34) for constant morphogen (level) boundary conditions, we observe that the scaled morphogen profiles are only consistent with exponentially decaying initial morphogen gradients. This fact is easy to realize by setting  $t = 0$  in both explicit solution formulas. Therefore, when the initial data is not an exponentially decaying profile, we expect that there is an initial transient  $0 \leq t \leq T_*$ , during which the morphogen profile dynamically evolves into a scaled solution profile of the form

$$M(x, t) = M_0 e^{\frac{-x}{\lambda L(t)}}, \quad \forall x \in [0, L(t)], \quad \forall t > T_*.$$

This onset time  $T_*$  is necessary for the solution to start scaling. Further discussion about the onset time and the initial transient is provided in the section on numerical experiments. In the presence of an initial transient i.e. if  $T_* > 0$ , the above theory still holds for  $t \geq T_*$  and all the expressions derived above can be readily modified to accommodate this onset time.

**2.4. Derivation of simplified consistent growth laws.** In the case of flux boundary conditions, we see that the explicit morphogen profile (30) satisfies,

$$\begin{aligned} \dot{M} &= M_t + uM_x, \\ \Rightarrow \frac{\dot{M}}{M} &= \frac{M_t}{M} + \frac{x\dot{L}}{L} \frac{M_x}{M}, \\ &= \frac{\dot{L}}{L} + \frac{x\dot{L}}{L^2} - \frac{x\dot{L}}{L^2}, \\ &= \frac{\dot{L}}{L} = \frac{\ln 2}{\tau} \end{aligned}$$

Thus, deriving Eq. 7 in the main text.

Similarly, for the explicit solutions (34) for constant morphogen levels at the source (proximal) boundary conditions, a direct calculation shows

$$\begin{aligned} \dot{M} &= M_t + uM_x, \\ \Rightarrow \frac{\dot{M}}{M} &= \frac{M_t}{M} + \frac{x\dot{L}}{L} \frac{M_x}{M}, \\ (35) \quad &= \frac{x\dot{L}}{L^2} - \frac{x\dot{L}}{L^2}, \\ &\equiv 0. \end{aligned}$$

This establishes that for point boundary conditions,  $\dot{M} \equiv 0$ , i.e, in other words, the cells divide to maintain homeostasis.

**2.5. Homeostatic growth law as a limit case of growth law Eq. 3 (main text).** The simplified growth law (Eq. 3 in the main text) is

$$(36) \quad \frac{1}{\tau} = \frac{1}{\theta} \frac{\dot{M}}{M}.$$

Clearly, setting  $\theta = \ln(2)$  recovers Eq. 7 (the case of constant flux boundary conditions).

It is reasonable to assume that the cell division time  $\tau > 0$  i.e, the cell cycle cannot be infinitely fast. We have the following calculation,

$$\begin{aligned} \frac{\theta}{\tau} &= \frac{\dot{M}}{M}, \\ \text{hence, } \lim_{\theta \rightarrow 0} \frac{\theta}{\tau} &= 0 \Rightarrow \lim_{\theta \rightarrow 0} \frac{\dot{M}}{M} = 0, \\ &\Rightarrow \lim_{\theta \rightarrow 0} \dot{M} = 0. \end{aligned}$$

The above follows from the fact that the morphogen  $M > 0$  i.e, there is some basal (very small) morphogen signalling. Thus, the limit case of the growth law Eq. 3 of the main text, when  $\theta \rightarrow 0$  leads recovers the homeostasis  $\dot{M} = 0$ , which is consistent with constant morphogen levels at source boundary conditions.

**2.6. Noise in the growth parameter  $\theta$ .** As indicated in the main text, the global properties of scaled morphogen profile, uniform tissue growth and attainment of a finite final size are quite robust to the various biochemical parameters of the system when the morphogen evolution equation (9) is simulated together with the growth law, Eq. 3 in the main text. A crucial role is played by the growth parameter  $\theta$  as it determines when exactly the cell divides. It is reasonable to suppose that an universal value of the parameter  $\theta$  (i.e, the same value of  $\theta$  for all cells in the tissue) is probably unrealistic in real biological scenarios. A more plausible assumption is to introduce some noise in  $\theta$ . Will the global properties be robust with respect to this intrinsic noise? To answer this question, we simulated the morphogen equation (9) with growth law Eq. 3 in the main text, with a noisy  $\theta = \ln(2) + 0.2\mathcal{N}$  with  $\mathcal{N}$  denoting the standard normal. The resulting mean morphogen profile as function of relative concentration and mean proliferation rate as a function of relative tissue position are shown in figure S8. The results clearly show that the properties of scaled morphogen profiles and uniform tissue growth were robust to the noise in the growth parameter. Both properties are obtained with a standard deviation which is less than 1 percent of the mean (calculated over 500 samples).

### 3. ANALYTICAL RESULTS IN THE PRESENCE OF THE EXPANDER

The above analytical results and the numerical results presented in the main text show that scaling and uniform growth can result directly from local cell division rule, even in the absence of the expander. The analytical

results presented below explain the role that the expander plays in this paradigm.

**3.1. Scaled morphogen profiles lead to a finite final tissue size, even in the presence of the expander.** First, we show that under the assumption of normalized scaling of the morphogen (11) and other biologically reasonable assumptions, the tissue has to attain a finite final size. The precise result is stated in the form of the following lemma,

**Lemma 3.1.** *Let  $M$  be a solution of (5) with the following assumptions,*

- (i.) *Constant flux boundary conditions on the proximal boundary i.e.,*

$$(37) \quad DM_x(0, t) = \eta, \quad \eta < 0.$$

- (ii.) *The (normalized) morphogen profile scales, i.e it satisfies (11)*

- (iii.) *There exists a time  $t^* > 0$  such that for all  $t > t^*$ , there exists a relative position  $L^*(t) = CL(t)$  and some (possibly very small) amount of morphogen in a part of the tissue  $[0, L^*]$  i.e, there exists an  $\epsilon > 0$  (possibly very small) such that*

$$(38) \quad M(x, t) \geq \epsilon, \quad \forall x \in [0, L^*(t)], \quad t > t^*.$$

*This assumption corresponds to requiring that there is at least a part of the tissue that contains a minimal amount of morphogen after scaling commences at time  $t = t^*$ .*

- (iv.) *The tissue growth is always non-negative i.e,  $u \geq 0$ .*  
(v.) *The morphogen concentration forms a gradient i.e,  $\widehat{M}'(\xi) \leq 0$ .*  
(vi.) *The expander concentration is bounded (finite) for all time, i.e, there exists a constant  $K$  such that  $\forall t > 0$ ,*

$$E(x, t) \leq K, \quad \forall x \in [0, L(t)].$$

*Then, the size of the tissue at any time is finite.*

**Proof.** First, we observe that scaling (11) implies

$$(39) \quad M_t = \bar{m}L'(t) \left( \widehat{M} - \widehat{M}'(\xi)\xi \right) \geq 0,$$

as the morphogen concentration and growth are always non-negative, the gradient is non-increasing and relative position  $\xi \in [0, 1]$ .

Next, we integrate the evolution equation (13) over  $[0, L^*(t)]$  to obtain using the fundamental theorem of calculus that,

$$\begin{aligned}
\int_0^{L^*(t)} M_t dx &= D_M \int_0^{L^*(t)} M_{xx} dx - \alpha_M \int_0^{L^*(t)} \frac{M}{1+E} dx - \int_0^{L^*(t)} (uM)_x dx, \\
&= D_M M_x(L(t), t) - D_M M_x(0, t) - \alpha_M \int_0^{L^*(t)} \frac{M}{1+E} dx \\
&\quad - u(L(t), t)M(L(t), t) + u(0, t)M(0, t) \\
&\leq -\eta - \alpha_M \int_0^{L^*(t)} \frac{M}{1+E} dx - u(L(t), t)M(L(t), t), \\
&\leq -\eta - \alpha_M \int_0^{L^*(t)} \frac{M}{1+E} dx
\end{aligned}$$

In the above, we have used boundary conditions (37), the scaling assumption (11) and the non-decreasing gradient assumption v. and the fact that  $u(0) = 0$  and growth and morphogen concentration are always non-negative.

From the above, the assumption [vi.] on the expander and (38), we obtain

$$\begin{aligned}
0 &\leq \int_0^{L^*(t)} M_t dx \leq -\eta - \alpha \int_0^{L^*(t)} \frac{M}{1+E} dx \\
\Rightarrow \quad 0 &\leq -\eta - \alpha_M L^*(t) \epsilon \\
\Rightarrow \quad L^*(t) &\leq \frac{-\eta}{\alpha_M \epsilon} \\
\Rightarrow \quad L(t) &\leq \frac{-\eta}{C \alpha_M \epsilon}
\end{aligned} \tag{40}$$

with  $\epsilon = \frac{\bar{\epsilon}}{1+K}$ . The above equation clearly shows that  $L(t)$  is finite for any time  $t$ .

### 3.2. Finite final tissue size and flat expander profile implies exponentially decaying morphogen gradients and uniform growth.

Henceforth, we will assume that the expander profile is flat i.e.,

$$E(x, t) = E(t), \quad \forall x \in [0, L(t)]. \tag{41}$$

This assumption is reasonable, particularly for highly diffusible expanders i.e, when  $D_E \gg 1$ , see [2] for motivation of why using a flat expander profile is biologically realistic.

Once the tissue attains a finite final size, clearly  $u, u_x \equiv 0$  and the equations will converge to a steady state. As the expander profile is assumed to flat (spatially uniform), the steady solution of (5) with flux boundary conditions and a constant (in space) steady state morphogen concentration  $M_{st}$ , is given by,

$$M_{st}(x) = \bar{m} L_f e^{-\frac{x}{\lambda L_f}}, \tag{42}$$

for some decay length  $\lambda$  that needs to be determined. Here,  $L_f$  is the final tissue size (also to be determined). As the solution scales throughout the

dynamics (after a possible initial transient stage), it is reasonable to assume from the shape of the solution at steady state (19) that the unsteady solution is also an exponentially decaying morphogen profile:

$$(43) \quad M(x, t) = \overline{m}L(t)e^{-\frac{x}{\lambda L(t)}},$$

with the same  $C, \lambda$  as in (42) and with  $L(t)$  being the length of the tissue at time  $t$ . The solution for constant morphogen boundary conditions can be determined analogously.

Given the solution (43), we plug it in (5) to obtain,

$$(44) \quad \frac{L'(t)}{L(t)} + \frac{xL'}{\lambda L^2} = D_M \left( \frac{1}{\lambda L} \right)^2 - \frac{\alpha_M}{1 + E(t)} - u_x + u \frac{1}{\lambda L}.$$

Using the fact that the expander profile is flat in space (41) and differentiating the above equation by  $x$  we get

$$(45) \quad u_{xx} = \frac{1}{\lambda L} u_x - \frac{1}{\lambda L} \frac{L'}{L}$$

The general solution for the above equation is ,

$$(46) \quad u_x = a(t)e^{\frac{x}{\lambda L}} + \frac{\dot{L}}{L}$$

Integrating again over  $x$  we get

$$(47) \quad u = a(t)\lambda L e^{\frac{x}{\lambda L}} + x \frac{L'}{L} + b(t)$$

From the definition of  $u$  (1), we obtain the boundary conditions are  $u(x=0) = 0$ ,  $u(x=L) = L'(t)$ . Substituting, we get that  $a(t) = 0$ , and therefore  $u_{xx} = 0$  and  $u_x$  is independent of space, i.e. growth is uniform.

**3.3. Effective evolution equation for a flat expander profile in an uniformly growing tissue.** Under the assumptions that the expander profile is flat and the expander is assumed to be very diffusive, i.e.,  $D_E \gg 1$ , we can (formally) derive an effective equation for the expander dynamics. We do so using an operator splitting approach.

Observing the expander evolution equation (6) reveals that three different effects (operators) contribute to the dynamics:

1. *Production* characterized by the term  $\beta_E \mathbb{I} p$  i.e, the expander is produced in an expression domain (part of the tissue) at a constant rate, with  $\mathbb{I}$  being the indicator function defined in (7).
2. *Diffusion* characterized by the term  $D_E E_{xx}$ .
3. *Dilution* modeled by the terms  $\alpha_E E$  (expander degradation),  $u_X E$  (dilution due to growth) and  $u E_x$  (transport due to growth).

Our strategy would be to analyze the expander evolution equation at any given time  $t$ , by factoring the total evolution over a given very small time step  $\Delta t$  into three parts. Given a spatially uniform expander profile  $E(t)$  at time  $t$ , first, we will produce the expander assuming that it does not diffuse or

dilute (due to the very small time step), then we diffuse it without producing or diluting it and finally, we dilute it without producing or diffusing it. The process is iterated over each small time step to obtain the global (in time and space) dynamics of the expander. We formalize the above heuristics below:

Let  $\mathcal{S}_t$  be the evolution operator for  $E$  from the evolution equation (6). In other words,

$$(48) \quad \mathcal{S}_t : E(x, 0) \mapsto E(x, t), \quad E(x, t) = \mathcal{S}_t E(x, 0).$$

For a small time step  $\Delta t$ , the operator can be split (factorized) into three constituent operators i.e,

$$(49) \quad E(x, t + \Delta t) := \mathcal{S}_{\Delta t} E(x, t) = \mathcal{S}_{\Delta t}^3 \mathcal{S}_{\Delta t}^2 \mathcal{S}_{\Delta t}^1 E(x, t).$$

Here,  $\mathcal{S}_t^1$  is the solution operator associated with the production equation:

$$(50) \quad E_t = \beta_E \mathbb{I}_{\mathcal{P}(t)}.$$

Similarly,  $\mathcal{S}_t^2$  is the solution operator associated with the diffusion equation:

$$(51) \quad E_t = D_E E_{xx},$$

and  $\mathcal{S}_t^3$  is the solution operator associated with the transport-dilution equation:

$$(52) \quad E_t + u E_x + u_x E = -\alpha_E E,$$

Note that the global evolution can be obtained by iteration of the above procedure over  $k$  time steps with  $k\Delta t = t$  i.e,

Assuming a flat initial expander profile (41) for a given time, we can explicitly solve the equation (50) for a small time step  $\Delta t$  to obtain,

$$(53) \quad \mathcal{S}_{\Delta t}^1 E(x, t) = E(t) + \Delta t \beta_E \mathbb{I}_{\mathcal{P}(t)}.$$

Thus, the expander concentration that we obtain after the production step is a jump discontinuity between  $E(t)$  and  $E(t) + \beta_E \Delta t$ .

Now, we consider the diffusion step i.e, solve the diffusion equation (51) with initial data  $\mathcal{S}_{\Delta t}^1 E$  as calculated above. As the diffusion is fast, i.e,  $D_E \gg 1$ , this jump discontinuity very rapidly diffuses to a constant:

$$(54) \quad \mathcal{S}_{\Delta t}^2 \mathcal{S}_{\Delta t}^1 E(x, t) = E^{av}(t + \Delta t).$$

Note that integrating the diffusion equation (51) over the length of tissue  $[0, L(t)]$  and using the zero flux boundary conditions for the expander we

obtain that

$$\begin{aligned}
& \int_0^{L(t)} E_t(x, t) dx = D_E \int_0^{L(t)} E_{xx}(x, t) dx, \\
\Rightarrow \quad & \frac{d}{dt} \int_0^{L(t)} E(x, t) dx = D_E (E_x(L(t), t) - E_x(0, t)) \quad \text{integration by parts,} \\
& \equiv 0. \\
\Rightarrow \quad & \int_0^{L(t)} E(x, t + \Delta t) dx \equiv \int_0^{L(t)} E(x, t) dx, \quad \forall \Delta t.
\end{aligned}$$

The last equation above is a statement of the conservation of total expander concentration in the whole domain when there is no flux across its boundaries and when it is only diffusing inside the domain.

Using the above mass conservation and the formula (53), we can calculate the constant (in space)  $E^{av}$  in (54) as

$$\begin{aligned}
LE^{av}(t) &= \int_0^{L(t)} \mathcal{S}_{\Delta t}^2 \mathcal{S}_{\Delta t}^1 E(t) dx \\
&= \int_0^{L(t)} \mathcal{S}_{\Delta t}^1 E(t) dx \\
&= (L - P)E(t) + P(E(t) + \beta_E \Delta t) \\
&= LE(t) + P\beta_E \Delta t. \\
\Rightarrow \quad E^{av}(t) &= E(t) + \frac{P(t)}{L(t)} \beta_E \Delta t.
\end{aligned}$$

In the final step, we solve the transport-dilution equation (52) with the above initial data. As the data is a constant, the transport has no effect and the data is just diluted by the (uniform in space) degradation terms, i.e,

$$(55) \quad \mathcal{S}_{\Delta t}^3 E^{av}(t) = E^{av}(t) - \Delta t(\alpha_E + u_x) E^{av}(t).$$

Therefore, combining each of the above three steps, the evolution of the expander for the short time  $\Delta t$  is given by,

$$\begin{aligned}
(56) \quad E(x, t + \Delta t) &:= \mathcal{S}_{\Delta t}^3 \mathcal{S}_{\Delta t}^2 \mathcal{S}_{\Delta t}^1 E(x, 0), \\
&= E(t) + \frac{P(t)}{L(t)} \beta_E \Delta t - \alpha_E E(t) \Delta t - u_x E \Delta + \mathcal{O}((\Delta t)^2).
\end{aligned}$$

Hence,

$$\begin{aligned}
E_t &= \lim_{\Delta t \rightarrow 0} \frac{E(t + \Delta t) - E(t)}{\Delta t} \\
&= \lim_{\Delta t \rightarrow 0} \left( \frac{P(t)}{L(t)} \beta_E - \alpha_E E(t) - u_x E(t) + \mathcal{O}(\Delta t) \right), \\
&= \frac{P(t)}{L(t)} \beta_E - \alpha_E E(t) - u_x E(t).
\end{aligned}$$

Therefore, the effective expander evolution equation for highly diffusible expander is given by

$$(57) \quad \dot{E} = \frac{P(t)}{L(t)} \beta_E - (\alpha_E + u_x) E.$$

**3.4. Explicit solutions for scaled morphogen profiles.** We have shown that scaling and a flat expander profile imply that the tissue grows uniformly. Therefore, the morphogen evolution equation (5) takes the form:

$$(58) \quad M_t + x \frac{\dot{L}(t)}{L(t)} M_x = D_M M_{xx} - \alpha_M \frac{M}{1 + E} - \frac{\dot{L}(t)}{L(t)} M,$$

If we assume normalized scaling (11), we obtain from (58) that

$$\begin{aligned}
(59) \quad M_t + \frac{x \dot{L}}{L} M_x &= \frac{\dot{L}}{L} M - \frac{x \dot{L}}{L^2} \widehat{M}'(\xi) + \frac{x \dot{L}}{L^2} \widehat{M}'(\xi) \\
&= \frac{\dot{L}}{L} M,
\end{aligned}$$

Substituting the above into the morphogen evolution equation (58), we obtain

$$(60) \quad \frac{\widehat{M}''(\xi)}{\widehat{M}(\xi)} = \frac{\omega^2}{D_M} \left( 2L(t) \dot{L}(t) + \alpha_M \frac{L(t)^2}{1 + E} \right).$$

The left hand side of the above equation (60) depends only on the relative position  $\xi$  and the right hand side depends only on the time variable. The equality of these terms implies that both the left and right hand sides have to be equal for all values i.e, for some constant  $\bar{\lambda}$ , we have

$$(61) \quad \frac{\widehat{M}''(\xi)}{\widehat{M}(\xi)} = \frac{1}{\bar{\lambda}^2}.$$

By setting  $\lambda = \omega \bar{\lambda}$ , the general solution of the above ODE is given by,

$$(62) \quad M(x, t) = \bar{m} L(t) e^{\frac{-x}{\bar{\lambda} L(t)}}$$

which is precisely Eqn 4 in the main text. Note that the presence of a flat expander results in exactly the same scaled profile as the absence of the expander

Similarly, the right hand side of (60) results in the ODE,

$$(63) \quad \frac{\dot{L}}{L} = \frac{D_M \lambda^2}{2L^2} - \frac{\alpha_M}{2(1+E)}.$$

This, together with the effective expander evolution equation (57),

$$(64) \quad \dot{E} = \frac{P}{L} \beta_E - \alpha_E E - \frac{\dot{L}}{L} E.,$$

together constitutes a coupled system whose solution determines the tissue length and the expander concentration in time.

**3.5. Explicit expression of the expander production domain.** In order to complete the system (57) and (63), we need to specify the expander expression domain  $\mathcal{P}$ . To this end, we use the explicit morphogen profile (62) and calculate  $\mathcal{P}$  (8) directly below.

As  $M$  is monotonically decreasing in space, we have two possible cases:

- *Case 1:* For any given  $t$ ,  $M(0, t) < T_{rep}$ . In this case, the morphogen has not accumulated enough to repress the expander anywhere through the tissue length. Hence,

$$\mathcal{P}(t) = [0, L(t)], \quad P(t) = L(t),$$

- *Case 2:* There exists a  $x^* \in [0, L(t)]$  such that

$$\begin{aligned} M(x^*, t) &= T_{rep} \\ \Rightarrow \quad \bar{m} L(t) e^{\frac{-x^*}{\lambda L(t)}} &= T_{rep} \\ \Rightarrow \quad x^* &= \lambda L \ln(L) - \lambda L \ln\left(\frac{T_{rep}}{\bar{m}}\right). \end{aligned}$$

Therefore,

$$(65) \quad \mathcal{P}(t) = [x^*(t), L(t)], \quad P(t) = L - x^* = L - \lambda L \ln(L) + \lambda L \ln\left(\frac{T_{rep}}{\bar{m}}\right)$$

Hence, in this case,

$$(66) \quad \frac{P}{L} = 1 - \lambda \ln(L) + \lambda \ln\left(\frac{T_{rep}}{\bar{m}}\right).$$

We can make a further approximation in the case of relatively large tissues i.e if  $L \gg 1$ , the  $L \ln(L) \approx L$  and the length of the expander domain (65) simplifies as

$$(67) \quad P(t) = (1 - \lambda)L + \lambda L \ln\left(\frac{T_{rep}}{\bar{m}}\right)$$

and

$$(68) \quad \frac{P(t)}{L(t)} = 1 - \lambda + \lambda \ln\left(\frac{T_{rep}}{\bar{m}}\right) = c^*.$$

Thus, in both cases (at least for relatively long tissues), the expander is expressed in a domain which is a constant fraction of the tissue length and grows linearly with the tissue length. Henceforth, we will assume that Case 2 holds as this is indeed true for the long time asymptotics of the system as in a biological relevant system, enough morphogen eventually accumulates to suppress the expander at least in some part of the tissue.

Hence, the effective equation for the evolution evolution is

$$(69) \quad \dot{E} = c^* \beta_E - \alpha_E E - \frac{\dot{L}}{L} E.$$

Combining (63) and (69), we derive the equations that govern the dynamics of coupled tissue length-expander concentration system.

We have not been able to obtain explicit solution formulas for (63) and (69), one can easily show that the right hand side of the ODE is Lipschitz continuous when  $L > 0$ . Hence, by the classical Cauchy-Lipschitz theorem, unique solutions of the ODE system exist for all time. Furthermore, extensive numerical simulations show that the ODE system converges (in a finite time) to the steady state of the form,

$$(70) \quad E^{st} = \frac{c^* \beta_E}{\alpha_E}, \quad L^{st} = \frac{1}{\lambda} \sqrt{\frac{D}{\alpha} \left( 1 + \frac{c^* \beta_E}{\alpha_E} \right)}.$$

Thus, we derive Eq. 8 in the main text. An example of a simulation of the ODE system (63) and (69) is shown in figure S9. The example clearly shows convergence to the predicted steady states in finite time.

**Remark.** The case of absence of expander can be easily recovered from the above analysis by setting  $E \equiv 0$  in (5). We obtain the explicit solutions (30) for the flux boundary conditions. Note that ODE (63) is decoupled and can be readily solved.

**3.6. Point boundary conditions.** The above analysis for scaled solutions and flat expander profiles can also be carried analogously in the case where the absolute concentration of morphogen, rather than its flux, is fixed at the proximal boundary i.e,

$$M(0, t) \equiv M_0, \quad \forall t.$$

In this case, we can require for the morphogen profile to be scaled i.e, the morphogen concentration depends only on the relative cellular position  $\xi = \frac{x}{L(t)}$  leading to

$$(71) \quad M(x, t) = M(\xi) = M\left(\frac{x}{L(t)}\right).$$

By carrying out the steps in the derivation, as in the case of flux boundary conditions, one can show that the scaled morphogen profile is of the form,

$$M(x, t) = M_0 e^{\frac{-x}{\lambda L(t)}}$$

Also, the tissue length and expander concentration are related by the ODE system,

$$(72) \quad \begin{aligned} \frac{\dot{L}}{L} &= \frac{D\omega^2}{L^2} - \frac{\alpha}{1+E}, \\ \dot{E} &= c^*\beta_E - \alpha_E E - \frac{\dot{L}}{L}E. \end{aligned}$$

**3.7. Derivation of consistent growth laws.** In the case of flux boundary conditions, we see from the morphogen evolution equation (58) that scaled solutions (11) satisfy,

$$\begin{aligned} \dot{M} &= M_t + uM_x, \\ \Rightarrow \frac{\dot{M}}{M} &= \frac{M_t}{M} + \frac{x\dot{L}}{L} \frac{M_x}{M}, \\ &= \frac{\dot{L}}{L} + \frac{x\dot{L}}{L^2} - \frac{x\dot{L}}{L^2}, \\ &= \frac{\dot{L}}{L} = \frac{\ln 2}{\tau} \end{aligned}$$

Thus, deriving Eq. 7 in the main text.

#### 4. NUMERICAL SCHEMES

As stated in the main text, our aim is to systematically investigate the solutions of the coupled growth-patterning system Eqs. 1,2 (main text) with growth law Eq. 9 (main text) and to show that the resulting morphogen profile scales, the resulting tissue grows uniformly and attains a finite final size. We carry out this investigation over a very large range of the parameter space with extensive numerical simulations.

The numerical simulation of Eqs. 1,2,9 of main text is challenging on account of the fact that we are trying to approximate a nonlinear system of advection-reaction-diffusion equations on a growing domain and with nonlinear coupling between the growth law and the morphogen evolution. The main idea behind an efficient numerical simulation is to transform the morphogen and expander evolution equations in growing coordinates to the fixed coordinates.

**4.1. Governing equation in fixed coordinates.** For the numerical simulation of the system (5), we need to transform the morphogen evolution equation on a growing domain into a fixed coordinate system. We do so by transforming (5) to the fixed initial domain  $[0, L_0]$  by using the coordinate transformation:

$$(73) \quad \overline{M}(Y, t) = M(x, t), \quad \overline{E}(Y, t) = E(x, t).$$

Here the relation between the position  $x = x(t)$  and the fixed coordinate  $Y$  is established through (1) i.e,  $x(t)$  is the position at time  $t$  of the cell that was located at position  $Y$  at time  $t = 0$ .

Differentiating (1) with respect to  $Y$ , we obtain the flow equation,

$$(74) \quad \begin{aligned} \frac{d}{dt}x_Y &= u_Y, \\ x_Y(0) &= 1. \end{aligned}$$

Similarly differentiating (73) with respect to time on both sides, we obtain,

$$\begin{aligned} \overline{M}_Y Y_t + \overline{M}_t &= M_t + M_x x_t, \\ \Rightarrow \overline{M}_t &= M_t + u M_x. \end{aligned}$$

Note that in the above derivation, we use  $Y_t \equiv 0$  (as the initial condition  $Y$  remains fixed in time) and also the flow type growth law (1). Similar computation results in

$$\overline{E}_t = E_t + u E_x.$$

Using the above relations, we transform the advection-diffusion-reaction morphogen and expander evolution equations (5) and (6) to fixed coordinates resulting in

$$(75) \quad \begin{aligned} \overline{M}_t &= \frac{D_M}{x_Y} \left( \frac{\overline{M}_Y}{x_Y} \right)_Y - \alpha(\overline{E}) \overline{M} - \frac{u_Y}{x_Y} \overline{M}, \quad \forall (Y, t) \in [0, L_0] \times [0, T], \\ \overline{E}_t &= \frac{D_E}{x_Y} \left( \frac{\overline{E}_Y}{x_Y} \right)_Y - \alpha_E \overline{E} - \frac{u_Y}{x_Y} \overline{E} + \beta_E h(\overline{M}). \end{aligned}$$

The only input required to complete the evolution equations (75) and (74) is the *cell proliferation rate*:  $\frac{u_Y}{x_Y}$  as,

$$(76) \quad \frac{d}{dt}x_Y = u_Y = \frac{u_Y}{x_Y} x_Y = \frac{\ln(2)}{\tau} x_Y$$

This establishes Eqs. 9 and 10 in the main text.

From the growth law Eq. 3 of the main text, the above expression reduces to,

$$\begin{aligned} \frac{1}{\tau} &= \frac{1}{\theta} \left( \frac{D_M}{x_Y \overline{M}} \left( \frac{\overline{M}_Y}{x_Y} \right)_Y - \alpha(E) - \frac{\ln(2)}{\tau} \right) \\ \Rightarrow (\theta + \ln(2)) \frac{1}{\tau} &= \frac{D_M}{x_Y \overline{M}} \left( \frac{\overline{M}_Y}{x_Y} \right)_Y - \alpha(E), \\ \Rightarrow \frac{1}{\tau} &= \frac{1}{\theta + \ln(2)} \left( \frac{D}{x_Y \overline{M}} \left( \frac{\overline{M}_Y}{x_Y} \right)_Y - \alpha(E) \right), \end{aligned}$$

Thus, deriving Eq. 11 in the main text.

From (76), we define,

$$(77) \quad K = u_x = \frac{u_Y}{x_Y} = \frac{\ln(2)}{\ln(2) + \theta} \left( \left( \frac{D}{x_Y \overline{M}} \left( \frac{\overline{M}_Y}{x_Y} \right)_Y - \alpha(E) \right) \right),$$

and obtain the accompanying growth law.

We numerically approximate the coupled system (75), (76) with growth law (77) with the following finite difference scheme: the fixed domain  $[0, L_0]$

is discretized into  $N + 1$  equally spaced points  $Y_j = j\Delta y$ , with  $\Delta y = L_0/N$  being the mesh size. The time interval of simulation  $[0, T]$  is discretized with  $\overline{N}$  intervals  $t^n = n\Delta t$ . The approximate solutions are denoted as

$$\overline{M}_j^n \approx \overline{M}(Y_j, t^n), \quad \overline{E}_j^n \approx \overline{E}(Y_j, t^n),$$

We use a standard (forward Euler) finite difference of the form,

$$(78) \quad \begin{aligned} \overline{M}_j^{n+1} - \overline{M}_j^n &= \frac{2D\sigma}{(X_Y)_j^n} \left( \frac{\overline{M}_{j+1}^n - \overline{M}_j^n}{(X_Y)_j^n + (X_Y)_{j+1}^n} \right) \\ &\quad - \frac{2D\sigma}{(X_Y)_j^n} \left( \frac{\overline{M}_j^n - \overline{M}_{j-1}^n}{(X_Y)_j^n + (X_Y)_{j-1}^{n+1}} \right) \\ &\quad - \Delta t \alpha (\overline{E}_j^n) \overline{M}_j^n - \Delta t K_j^n \overline{M}_j^n, \\ \overline{E}_j^{n+1} - \overline{E}_j^n &= \frac{2D\sigma}{(X_Y)_j^n} \left( \frac{\overline{E}_{j+1}^n - \overline{E}_j^n}{(X_Y)_j^n + (X_Y)_{j+1}^n} \right) \\ &\quad - \frac{2D\sigma}{(X_Y)_j^n} \left( \frac{\overline{E}_j^n - \overline{E}_{j-1}^n}{(X_Y)_j^n + (X_Y)_{j-1}^{n+1}} \right) \\ &\quad - \Delta t \alpha_E \overline{E}_j^n - \Delta t K_j^n \overline{E}_j^n + \Delta t \beta_E h(\overline{M}_j^n), \end{aligned}$$

with  $\sigma = \frac{\Delta t}{(\Delta y)^2}$ .

Furthermore, we use a backward Euler discretization of the ODE (74):

$$(79) \quad (X_Y)_j^{n+1} = \frac{(X_Y)_j^n}{(1 - \Delta t K_j^n)},$$

with the growth law being set by,

$$(80) \quad \begin{aligned} K_j^n &= \frac{\ln(2)}{\ln(2) + \theta} \left( \frac{2D_M\sigma}{(X_Y)_j^n \overline{M}_j^n} \left( \frac{\overline{M}_{j+1}^n - \overline{M}_j^n}{(X_Y)_j^n + (X_Y)_{j+1}^n} \right) \right) \\ &\quad - \frac{\ln(2)}{\ln(2) + \theta} \left( \frac{2D_M\sigma}{(X_Y)_j^n \overline{M}_j^n} \left( \frac{\overline{M}_{j+1}^n - \overline{M}_j^n}{(X_Y)_j^n + (X_Y)_{j+1}^n} \right) \right) \\ &\quad - \frac{\ln(2)\alpha(\overline{E}_j^n)}{\ln(2) + \theta}. \end{aligned}$$

We implement point boundary conditions by fixing morphogen concentration at source:

$$\overline{M}(0, t) = M_0,$$

and flux boundary conditions by specifying the morphogen flux at the source:

$$\frac{D\overline{M}_Y}{X_Y}(0, t) = \eta.$$

The boundary conditions at the lateral boundary are set to be non-reflecting Neumann type boundary conditions:

$$\frac{D\overline{M}_Y}{X_Y}(L_0, t) = 0.$$

Similarly, we use zero-flux boundary conditions for the expander at both the proximal and distal boundaries:

$$\overline{E}_Y(0, t) = \overline{E}_Y(L_0, t) \equiv 0.$$

**4.2. Scaling and uniform growth scores.** In our simulations, we need to decide whether a system has a scaled morphogen gradient or not. For any given time  $t$ , we fit an exponential of the form (18) to the computed morphogen profile. Then, we calculate the time  $t_{ss}$  at which growth has reached steady state. The steady state for growth is reached when

$$(81) \quad 100 \frac{L_{t+\Delta t} - L_t}{L_t} < 0.001,$$

i.e, steady state is reached when the relative increase in  $L$  between consecutive time points is below 0.001%.

The time  $t_\lambda$  of the onset of scaling is reached when

$$(82) \quad 100 \frac{\lambda_{t+\Delta t} - \lambda_t}{\lambda_t} < 0.006.$$

In other words, scaling is attained once the relative increase in  $\lambda$  between consecutive time points is below 0.006%. The tissue is declared to be scaled if the morphogen gradient scales to the growing tissue for at least 50% of the duration of growth:

$$(83) \quad \frac{t_{ss} - t_\lambda}{t_{ss}} > 0.5$$

In order to decide whether the system grows uniformly or not, we adopt the following criteria. At any given time, we track the proportion that lineage of the first 10% and third 20% of cells occupy in the growing tissue. As in the case of specifying the scaling score, a tissue is considered to grow uniformly, if for at least 50% of the time before  $t_{ss}$  the relative increase in the part of the tissue of the first 10% or the third 20% between consecutive time points is below 6.5%

The fine tuning of the numerical thresholds mentioned above was done empirically by observing simulations. Observe that both the scaling criteria and uniform growth criteria take into account the fact that there is an initial phase of development during which the morphogen may not scale and the tissue may not grow uniformly. We remark that the scaling score and the uniform growth score have been used in generating table 1 in the main text (results).

**4.3. Scaling error.** The scaling error is a dimensionless parameter describing the change in the sharpness of the gradient in relative coordinates ( $\lambda_{rel}$ ), relative to the growth of the tissue. Since this is a dimensionless quantity which is ideally zero, excellent scaling is achieved when  $|\frac{\partial \lambda}{L}| \ll 1$ . Scaling is reasonable when  $|\frac{\partial \lambda}{L}| \approx 1$ .

In order to compare scaling quality as a function of proliferation rate ( $q$ ) between simulations with decreasing  $q$  and simulations with constant  $q$ , we have used this scaling error. In the constant  $q$  case, the scaling error converges during a simulation to a certain value and remains stable until a very large size is reached (for constant  $q$  tissue length increases exponentially). Then, the morphogen level is almost zero everywhere except the proximal end rendering the simulation biologically invalid. This behavior was observed in numerous simulations. Therefore, in the constant  $q$  case the scaling error is taken as this stable value.

#### 4.4. Simulation scenarios and parameter values.

4.4.1. *Figure 2.* We simulated a tissue with a morphogen dependent growth law and ExR with following parameters consistent with experimental measurements for the wing disc:

|                         |      |
|-------------------------|------|
| $D_M[\mu m^2 sec^{-1}]$ | 400  |
| $\alpha_M[h^{-1}]$      | 10   |
| $\eta[a.u.]$            | 100  |
| $D_E[\mu m^2 sec^{-1}]$ | 400  |
| $\alpha_E[h^{-1}]$      | 0.05 |
| $\beta_E[a.u.]$         | 10   |
| $T_{Expander}[a.u.]$    | 0.01 |
| $\theta$                | 0.5  |
| $L_0[\mu m]$            | 10   |

4.4.2. *Figure 3.* A tissue with a morphogen dependent growth law, no ExR:

|                         |     |
|-------------------------|-----|
| $D_M[\mu m^2 sec^{-1}]$ | 100 |
| $\alpha_M[h^{-1}]$      | 0.1 |
| $\eta[a.u.]$            | 10  |
| $\theta$                | 0.5 |
| $L_0[\mu m]$            | 10  |

4.4.3. *Figure 4.* Sensitivity  $S_X(p)$  of a quantity  $X$  to a parameter  $p$  is defined as the average over  $p$  of  $\frac{p}{X} \left| \frac{\partial X}{\partial p} \right|$ .

In plot (a) we tested the Sensitivity ratio of the final tissue size and the gradient length scale (in relative coordinates),  $\log_2 \frac{S(p)_{with ExR}}{S(p)_{No ExR}}$ , to various model parameters. For this test we used a basic parameter set:

|                         |           |
|-------------------------|-----------|
| $D_M[\mu m^2 sec^{-1}]$ | 10        |
| $\alpha_M[h^{-1}]$      | 0.1       |
| $\eta[a.u.]$            | 1         |
| $D_E[\mu m^2 sec^{-1}]$ | 100       |
| $\alpha_E[h^{-1}]$      | $10^{-2}$ |
| $\beta_E[a.u.]$         | 0.25      |
| $T_{Expander}[a.u.]$    | 0.01      |
| $\theta$                | 1         |
| $L_0[\mu m]$            | 10        |

In order to calculate each  $S_X(p)$  for every  $p_0$  we simulated this parameter set 10 times when only the value of  $p_0$  varies between simulations. We then calculated  $S_X(p_0)$  for  $X = L_f$  and  $X = \lambda$  (relative coordinates), using the formula

$$S_X(p_0) = mean_{p_0} \left( \frac{p_o}{X} \left| \frac{\partial X}{\partial p_0} \right| \right)$$

, averaging over the 10 runs. We did this twice for each  $S_X(p_0)$  - once with ExR and once without. We then calculated for each  $P$  and  $X$ ,

$$\log_2 \frac{S(p) with ExR}{S(p) No ExR}$$

, which is the quantity plotted in the figure 4a. The value ranges used for each  $p$  was,

|                             |           |
|-----------------------------|-----------|
| $D_M[\mu m^2 sec^{-1}] \in$ | [1,100]   |
| $\alpha_M[h^{-1}] \in$      | [0.01,1]  |
| $\eta[a.u.] \in$            | [0.1,10]  |
| $D_E[\mu m^2 sec^{-1}]$     | 100       |
| $\alpha_E[h^{-1}]$          | $10^{-2}$ |
| $\beta_E[a.u.]$             | 0.25 or 0 |
| $T_{Expander}[a.u.]$        | 0.01      |
| $\theta \in$                | [0.4,2]   |
| $L_0[\mu m] \in$            | [5,50]    |

In plots 4b and 4c, the basic parameter set is the one used in 4a. In 4b and 4c, we varied the values of  $\alpha_E$  and  $\beta_E$ . For each combination  $(\alpha_E, \beta_E)$  we compared the result ( $L_f$  in 4b and relative  $\lambda$  in 4c) with ExR to the result without ExR. The range of values of  $\alpha_E$  and  $\beta_E$  used can be seen in figures 4b and 4c.

4.4.4. *Table 1.* Valid runs are runs in which the tissue grew at least 2 fold. Only valid runs were taken into account for percentages of scaling and uniform growth. The parameter ranges are shown below. In both table 1a and 1b all possible parameter combinations were simulated.

**Table 1a:**

|                         |                             |
|-------------------------|-----------------------------|
| $D_M[\mu m^2 sec^{-1}]$ | 10,100                      |
| $\alpha_M[h^{-1}]$      | 1,10                        |
| $\eta[a.u.]$            | 1,10,100                    |
| $D_E[\mu m^2 sec^{-1}]$ | 10,100                      |
| $\alpha_E[h^{-1}]$      | $10^{-2}, 10^{-3}, 10^{-5}$ |
| $\beta_E[a.u.]$         | 0.1,1,10                    |
| $T_{Expander}[a.u.]$    | 0.01                        |
| $\theta$                | 0.5                         |
| $L_0[\mu m]$            | 10,40                       |
| # runs                  | 864                         |
| # valid runs            | 663                         |

**Table 1b:**

|                         |                 |
|-------------------------|-----------------|
| $D_M[\mu m^2 sec^{-1}]$ | 1,10,50,100,150 |
| $\alpha_M[h^{-1}]$      | 0.1,0.5,1,5,10  |
| $\eta[a.u.]$            | 0.1,1,10,70,100 |
| $\theta$                | 0.5,0.8,1.2     |
| $L_0[\mu m]$            | 5,10,20         |
| # runs                  | 3375            |
| # valid runs            | 2010            |

4.4.5. *Table 2.* See figure 4a

4.4.6. *Figure S1.* The following parameter set was simulated for several values of the proliferation rate  $q$ :

|                         |           |
|-------------------------|-----------|
| $D_M[\mu m^2 sec^{-1}]$ | 100       |
| $\alpha_M[h^{-1}]$      | 100       |
| $\eta[a.u.]$            | 100       |
| $D_E[\mu m^2 sec^{-1}]$ | 100       |
| $\alpha_E[h^{-1}]$      | $10^{-3}$ |
| $\beta_E[a.u.]$         | 10        |
| $T_{Expander}[a.u.]$    | 0.1       |
| $q \in$                 | [0.001,1] |
| $L_0[\mu m]$            | 10        |

4.4.7. *Figure S2.* Morphogen dependent growth law and ExR: same parameters as figure S1, with  $\theta = 1.2$ . ExR alone: same parameters as figure S1

4.4.8. *Figure S3.* We simulated the following parameter set (morphogen dependent growth law with ExR) varying for each run  $D_M$  and  $\alpha_M$ :

|                             |            |
|-----------------------------|------------|
| $D_M[\mu m^2 sec^{-1}] \in$ | $[1,100]$  |
| $\alpha_M[h^{-1}] \in$      | $[0.01,1]$ |
| $\eta[a.u.]$                | 1          |
| $D_E[\mu m^2 sec^{-1}]$     | 100        |
| $\alpha_E[h^{-1}]$          | $10^{-2}$  |
| $\beta_E[a.u.]$             | 0.25       |
| $T_{Expander}[a.u.]$        | 0.01       |
| $\theta$                    | 1          |
| $L_0[\mu m]$                | 10         |

20 different values for  $D_M$  and 20 different

values for  $\alpha_M$  were chosen and all possible  $(D_M, \alpha_M)$  combinations were simulated. The total number of simulations used for this plot is 400, the values of  $(D_M, \alpha_M)$  chosen were logarithmically spaced 20 element vectors in the above specified ranges.

4.4.9. *Figure S4-S5.* See figure 4a.

4.4.10. *Figure S6.* Similarly to figures S4, S5 the same basic parameter set was used. Here,  $S_X(p)$  are plotted when  $X$  are ExR only parameters. For every  $X$ , 10 equally spaced values were simulated. The values used were

|                             |                |
|-----------------------------|----------------|
| $D_M[\mu m^2 sec^{-1}]$     | 10             |
| $\alpha_M[h^{-1}]$          | 0.1            |
| $\eta[a.u.]$                | 1              |
| $D_E[\mu m^2 sec^{-1}] \in$ | $[10,1000]$    |
| $\alpha_E[h^{-1}] \in$      | $[0.002, 0.2]$ |
| $\beta_E[a.u.] \in$         | $[0.025, 2.5]$ |
| $T_{Expander}[a.u.] \in$    | $[0.004, 0.4]$ |
| $\theta$                    | 0.5            |
| $L_0[\mu m]$                | 10             |

4.4.11. *Figure S7.* **Plots a-d:**

|                         |     |
|-------------------------|-----|
| $D_M[\mu m^2 sec^{-1}]$ | 100 |
| $\alpha_M[h^{-1}]$      | 1   |
| $\eta[a.u.]$            | 1   |
| $\theta$                | 1   |
| $L_0[\mu m]$            | 10  |

**Plots e-h:**

|                         |           |
|-------------------------|-----------|
| $D_M[\mu m^2 sec^{-1}]$ | 100       |
| $\alpha_M[h^{-1}]$      | 1         |
| $\eta[a.u.]$            | 1         |
| $D_E[\mu m^2 sec^{-1}]$ | 100       |
| $\alpha_E[h^{-1}]$      | $10^{-2}$ |
| $\beta_E[a.u.]$         | 1         |
| $T_{Expander}[a.u.]$    | 0.01      |
| $\theta$                | 1         |
| $L_0[\mu m]$            | 10        |

**Plot i:**

|                         |           |
|-------------------------|-----------|
| $D_M[\mu m^2 sec^{-1}]$ | 10        |
| $\alpha_M[h^{-1}]$      | 1         |
| $\eta[a.u.]$            | 1         |
| $D_E[\mu m^2 sec^{-1}]$ | 100       |
| $\alpha_E[h^{-1}]$      | $10^{-2}$ |
| $\beta_E[a.u.]$         | 1         |
| $T_{Expander}[a.u.]$    | 0.01      |
| $q$                     | 0.1       |
| $L_0[\mu m]$            | 10        |

4.4.12. *Figure S10. Plots a-c: (Right compartment)*

|                         |      |
|-------------------------|------|
| $D_M[\mu m^2 sec^{-1}]$ | 400  |
| $\alpha_M[h^{-1}]$      | 10   |
| $\eta[a.u.]$            | 100  |
| $D_E[\mu m^2 sec^{-1}]$ | 400  |
| $\alpha_E[h^{-1}]$      | 0.05 |
| $\beta_E[a.u.]$         | 10   |
| $T_{Expander}[a.u.]$    | 0.01 |
| $\theta$                | 0.5  |
| $L_0[\mu m]$            | 10   |

**Plots a-c: (Left compartment)**

|                         |      |
|-------------------------|------|
| $D_M[\mu m^2 sec^{-1}]$ | 400  |
| $\alpha_M[h^{-1}]$      | 10   |
| $\eta[a.u.]$            | 100  |
| $D_E[\mu m^2 sec^{-1}]$ | 400  |
| $\alpha_E[h^{-1}]$      | 0.05 |
| $\beta_E[a.u.]$         | 0    |
| $T_{Expander}[a.u.]$    | 0.01 |
| $\theta$                | 0.5  |
| $L_0[\mu m]$            | 10   |

**Plots d-f: (Right compartment)**

|                         |      |
|-------------------------|------|
| $D_M[\mu m^2 sec^{-1}]$ | 400  |
| $\alpha_M[h^{-1}]$      | 10   |
| $\eta[a.u.]$            | 100  |
| $D_E[\mu m^2 sec^{-1}]$ | 400  |
| $\alpha_E[h^{-1}]$      | 0.05 |
| $\beta_E[a.u.]$         | 10   |
| $T_{Expander}[a.u.]$    | 0.01 |
| $\theta$                | 0.5  |
| $L_0[\mu m]$            | 10   |

**Plots d-f: (Left compartment)**

|                         |      |
|-------------------------|------|
| $D_M[\mu m^2 sec^{-1}]$ | 400  |
| $\alpha_M[h^{-1}]$      | 10   |
| $\eta[a.u.]$            | 100  |
| $D_E[\mu m^2 sec^{-1}]$ | 400  |
| $\alpha_E[h^{-1}]$      | 0.05 |
| $\beta_E[a.u.]$         | 0    |
| $T_{Expander}[a.u.]$    | 0.01 |
| $\theta$                | 0.8  |
| $L_0[\mu m]$            | 10   |

**Plots g-i: (Right compartment)**

|                         |      |
|-------------------------|------|
| $D_M[\mu m^2 sec^{-1}]$ | 400  |
| $\alpha_M[h^{-1}]$      | 10   |
| $\eta[a.u.]$            | 100  |
| $D_E[\mu m^2 sec^{-1}]$ | 400  |
| $\alpha_E[h^{-1}]$      | 0.05 |
| $\beta_E[a.u.]$         | 10   |
| $T_{Expander}[a.u.]$    | 0.01 |
| $\theta$                | 0.5  |
| $L_0[\mu m]$            | 10   |

**Plots g-i: (Left compartment)**

|                         |      |
|-------------------------|------|
| $D_M[\mu m^2 sec^{-1}]$ | 400  |
| $\alpha_M[h^{-1}]$      | 10   |
| $\eta[a.u.]$            | 100  |
| $D_E[\mu m^2 sec^{-1}]$ | 400  |
| $\alpha_E[h^{-1}]$      | 0.05 |
| $\beta_E[a.u.]$         | 0    |
| $T_{Expander}[a.u.]$    | 0.01 |
| $\theta$                | 0.8  |
| $L_0[\mu m]$            | 10   |

4.5. **Figures S11,S12. 1.** The morphogen flux is taken to be increasing in time ,i.e,

$$\eta(t) := 0.1\eta_0 L(t).$$

**Figures S11 a,b: (MDDR + ExR:)**

|                         |      |
|-------------------------|------|
| $D_M[\mu m^2 sec^{-1}]$ | 100  |
| $\alpha_M[h^{-1}]$      | 10   |
| $\eta_0[a.u.]$          | 10   |
| $D_E[\mu m^2 sec^{-1}]$ | 100  |
| $\alpha_E[h^{-1}]$      | 0.01 |
| $\beta_E[a.u.]$         | 10   |
| $T_{Expander}[a.u.]$    | 0.01 |
| $\theta$                | 0.5  |
| $L_0[\mu m]$            | 10   |

**Figures S12 a,b: (MDDR alone:)**

|                         |     |
|-------------------------|-----|
| $D_M[\mu m^2 sec^{-1}]$ | 100 |
| $\alpha_M[h^{-1}]$      | 0.1 |
| $\eta_0[a.u.]$          | 10  |
| $\theta$                | 0.5 |
| $L_0[\mu m]$            | 10  |

**2.** Absorbing boundary conditions for the morphogen  $M$  on the edge distant from the morphogen source (distal boundary):

**Figure S11 c,d (MDDR + ExR)**

|                         |      |
|-------------------------|------|
| $D_M[\mu m^2 sec^{-1}]$ | 100  |
| $\alpha_M[h^{-1}]$      | 1    |
| $\eta[a.u.]$            | 1    |
| $D_E[\mu m^2 sec^{-1}]$ | 10   |
| $\alpha_E[h^{-1}]$      | 0.01 |
| $\beta_E[a.u.]$         | 10   |
| $T_{Expander}[a.u.]$    | 0.01 |
| $\theta$                | 0.5  |
| $L_0[\mu m]$            | 10   |

**Figures S12 c,d: (MDDR alone:)**

|                         |     |
|-------------------------|-----|
| $D_M[\mu m^2 sec^{-1}]$ | 100 |
| $\alpha_M[h^{-1}]$      | 0.1 |
| $\eta[a.u.]$            | 10  |
| $\theta$                | 0.5 |
| $L_0[\mu m]$            | 10  |

**3.** Nonlinear degradation of  $M$  with degradation term,

$$\alpha(M) := -\alpha(E)M - nl(E)M^2, \quad nl(E) := (nl)_M(1 + E)^{p1}.$$

**Figure S11 e,f (MDDR + ExR)**

|                         |      |
|-------------------------|------|
| $D_M[\mu m^2 sec^{-1}]$ | 100  |
| $\alpha_M[h^{-1}]$      | 0    |
| $(nl)_M$                | 1    |
| $\eta[a.u.]$            | 1    |
| $D_E[\mu m^2 sec^{-1}]$ | 10   |
| $\alpha_E[h^{-1}]$      | 0.05 |
| $\beta_E[a.u.]$         | 10   |
| $T_{Expander}[a.u.]$    | 0.01 |
| $\theta$                | 0.5  |
| $L_0[\mu m]$            | 10   |

**Figures S12 e,f: (MDDR alone:)**

|                         |     |
|-------------------------|-----|
| $D_M[\mu m^2 sec^{-1}]$ | 100 |
| $\alpha_M[h^{-1}]$      | 0   |
| $(nl)_M$                | 1   |
| $\eta[a.u.]$            | 10  |
| $\theta$                | 0.5 |
| $L_0[\mu m]$            | 10  |

**4:** Nonlinear degradation of  $E$  with  $(nl)_E$ , being the coefficient of quadratic degradation:

$$\alpha(E) := -\alpha_E E - nl_E E^2.$$

**Figure S11 g,h (MDDR + ExR)**

|                         |      |
|-------------------------|------|
| $D_M[\mu m^2 sec^{-1}]$ | 100  |
| $\alpha_M[h^{-1}]$      | 1    |
| $\eta[a.u.]$            | 10   |
| $D_E[\mu m^2 sec^{-1}]$ | 100  |
| $\alpha_E[h^{-1}]$      | 0    |
| $(nl)_E$                | 0.01 |
| $\beta_E[a.u.]$         | 10   |
| $T_{Expander}[a.u.]$    | 0.01 |
| $\theta$                | 0.5  |
| $L_0[\mu m]$            | 10   |

5. Different  $h(M)$  and  $\alpha(E)$ . As in the previous two tables,

$$h(M) := \frac{1}{1 + \left(\frac{M}{T_{rep}}\right)^{hl}}, \quad \alpha(E) := \alpha_E(1 + E)^{p1}.$$

**Table S11 i,j: (MDDR + ExR)**

|                         |      |
|-------------------------|------|
| $D_M[\mu m^2 sec^{-1}]$ | 10   |
| $\alpha_M[h^{-1}]$      | 1    |
| $\eta[a.u.]$            | 1    |
| $D_E[\mu m^2 sec^{-1}]$ | 10   |
| $\alpha_E[h^{-1}]$      | 0.05 |
| $\beta_E[a.u.]$         | 10   |
| $T_{Expander}[a.u.]$    | 0.01 |
| $\theta$                | 0.5  |
| $L_0[\mu m]$            | 10   |
| $hl$                    | 1    |
| $p1$                    | -2   |

4.6. **Table S1.** In this table, valid runs are those runs where the tissue grew two fold. Only valid runs were taken into account for calculating percentages for scaling and uniform growth. The parameter ranges are shown below. In all the tables below, all possible parameter combinations were simulated.

4.6.1. *Case. 1:* The morphogen flux is taken to be increasing in time ,i.e,

$$\eta(t) := 0.1\eta_0 L(t).$$

**Table S1a: (MDDR + ExR)**

|                         |            |
|-------------------------|------------|
| $D_M[\mu m^2 sec^{-1}]$ | 10,100     |
| $\alpha_M[h^{-1}]$      | 1,10       |
| $\eta_0[a.u.]$          | 1,10,      |
| $D_E[\mu m^2 sec^{-1}]$ | 10,100     |
| $\alpha_E[h^{-1}]$      | 0.05, 0.01 |
| $\beta_E[a.u.]$         | 1,10       |
| $T_{Expander}[a.u.]$    | 0.01       |
| $\theta$                | 0.5        |
| $L_0[\mu m]$            | 10         |
| # runs                  | 64         |
| # valid runs            | 63         |

**Table S1b: (MDDR alone)**

|                         |         |
|-------------------------|---------|
| $D_M[\mu m^2 sec^{-1}]$ | 10,100  |
| $\alpha_M[h^{-1}]$      | 1,10    |
| $\eta[a.u.]$            | 1,10    |
| $\theta$                | 0.5,0.8 |
| $L_0[\mu m]$            | 10,20   |
| # runs                  | 32      |
| # valid runs            | 8       |

4.6.2. *Case 2:* Absorbing boundary conditions for the morphogen  $M$  on the edge distant from the morphogen source (distal boundary): **Table S1c: (MDDR + ExR)**

|                         |            |
|-------------------------|------------|
| $D_M[\mu m^2 sec^{-1}]$ | 10,100     |
| $\alpha_M[h^{-1}]$      | 1,10       |
| $\eta[a.u.]$            | 1,10       |
| $D_E[\mu m^2 sec^{-1}]$ | 10,100     |
| $\alpha_E[h^{-1}]$      | 0.05, 0.01 |
| $\beta_E[a.u.]$         | 1,10       |
| $T_{Expander}[a.u.]$    | 0.01       |
| $\theta$                | 0.5        |
| $L_0[\mu m]$            | 10         |
| # runs                  | 64         |
| # valid runs            | 38         |

**Table S1d: (MDDR alone)**

|                         |         |
|-------------------------|---------|
| $D_M[\mu m^2 sec^{-1}]$ | 10,100  |
| $\alpha_M[h^{-1}]$      | 1,10    |
| $\eta[a.u.]$            | 1, 10   |
| $\theta$                | 0.5,0.8 |
| $L_0[\mu m]$            | 10,20   |
| # runs                  | 32      |
| # valid runs            | 6       |

4.6.3. *Case 3:* Nonlinear degradation of  $M$  with degradation term,

$$\alpha(M) := -\alpha(E)M - nl(E)M^2, \quad nl(E) := (nl)_M(1 + E)^{p1}.$$

**Table S1e: (MDDR + ExR)**

|                         |        |
|-------------------------|--------|
| $D_M[\mu m^2 sec^{-1}]$ | 10,100 |
| $\alpha_M[h^{-1}]$      | 1,10   |
| $(nl)_M$                | 1, 10  |
| $\eta[a.u.]$            | 1,10   |
| $D_E[\mu m^2 sec^{-1}]$ | 10,100 |
| $\alpha_E[h^{-1}]$      | 0.05   |
| $\beta_E[a.u.]$         | 10     |
| $T_{Expander}[a.u.]$    | 0.01   |
| $\theta$                | 0.5    |
| $L_0[\mu m]$            | 10     |
| # runs                  | 48     |
| # valid runs            | 48     |

**Table S1f: (MDDR alone)**

|                         |         |
|-------------------------|---------|
| $D_M[\mu m^2 sec^{-1}]$ | 10,100  |
| $\alpha_M[h^{-1}]$      | 1,10    |
| $\eta[a.u.]$            | 1, 10   |
| $(nl)_M$                | 1, 10   |
| $\theta$                | 0.5,0.8 |
| $L_0[\mu m]$            | 10,20   |
| # runs                  | 48      |
| # valid runs            | 32      |

4.6.4. *Case 4:* Nonlinear degradation of  $E$  with  $(nl)_E$ , being the coefficient of quadratic degradation:

$$\alpha(E) := -\alpha_E E - nl_E E^2.$$

**Table S1g: (MDDR + ExR)**

|                         |            |
|-------------------------|------------|
| $D_M[\mu m^2 sec^{-1}]$ | 10,100     |
| $\alpha_M[h^{-1}]$      | 1,10       |
| $\eta[a.u.]$            | 1,10       |
| $D_E[\mu m^2 sec^{-1}]$ | 10,100     |
| $\alpha_E[h^{-1}]$      | 0, 0.05    |
| $(nl)_E$                | 0.01, 0.05 |
| $\beta_E[a.u.]$         | 10         |
| $T_{Expander}[a.u.]$    | 0.01       |
| $\theta$                | 0.5        |
| $L_0[\mu m]$            | 10         |
| # runs                  | 64         |
| # valid runs            | 50         |

4.6.5. *Case 5:* Different  $h(M)$  and  $\alpha(E)$ . As in the previous two tables,

$$h(M) := \frac{1}{1 + \left(\frac{M}{T_{rep}}\right)^{hl}}, \quad \alpha(E) := \alpha_E(1 + E)^{p1}.$$

In the previous two tables, we set  $hl = 4$ ,  $p1 = -1$ . In the following table, we vary these coefficients in order to test different functional forms of these functions.

**Table S1h: (MDDR + ExR)**

|                         |            |
|-------------------------|------------|
| $D_M[\mu m^2 sec^{-1}]$ | 10,100     |
| $\alpha_M[h^{-1}]$      | 1,10       |
| $\eta[a.u.]$            | 1,10       |
| $D_E[\mu m^2 sec^{-1}]$ | 10,100     |
| $\alpha_E[h^{-1}]$      | 0.05       |
| $(nl)_E$                | 0.01, 0.05 |
| $\beta_E[a.u.]$         | 10         |
| $T_{Expander}[a.u.]$    | 0.01       |
| $\theta$                | 0.5        |
| $L_0[\mu m]$            | 10         |
| $hl$                    | 1,2        |
| $p1$                    | -2,-5      |
| # runs                  | 64         |
| # valid runs            | 63         |

#### 4.7. Final tissue length prediction.

4.7.1. *Without ExR.* The predicted final size in this case is given by formula (30):

$$L_f^{Predicted} = \frac{1}{\lambda} \sqrt{\frac{D_M}{\alpha_M}}.$$

In order to calculate this value for a certain parameter set, we ran the simulation until final size was reached and then took the relative gradient length scale achieved as  $\lambda$  for the calculation. We then compared the final length the tissue reached in the simulation,  $L_f$ , to the prediction by calculating the ratio:  $\frac{L_f}{L_f^{Predicted}}$ . We calculated this ratio for all valid parameter sets used for table 1b (2010 sets) and by averaging over all 2010 sets obtained the following result:

$$\frac{L_f}{L_f^{Predicted}} = 1.15 \pm 0.06$$

4.7.2. *With ExR.* In this case, the final sizes are predicted by (70) to be

$$L_f^{Predicted} = \frac{1}{\lambda} \sqrt{\frac{D_M}{\alpha_M} \left( 1 + c^* \frac{\beta_E}{\alpha_E} \right)}$$

with

$$c^* = E^{st} \frac{\alpha_E}{\beta_E},$$

resulting in

$$L_f^{Predicted} = \frac{1}{\lambda} \sqrt{\frac{D_M}{\alpha_M} (1 + E^{st})}.$$

This prediction is valid in cases of flat expander profile. In order to test this prediction we took 72 parameter sets which had flat expander profile and ran each simulation until final size was reached. We took the relative gradient length scale achieved as  $\lambda$  for the calculation and the spatial average of expander level achieved as  $E^{st}$ . We then compared the final length the tissue reached in the simulation,  $L_f$ , to the prediction by calculating the ratio:  $\frac{L_f}{L_f^{Predicted}}$ . We calculated this ratio for all parameter sets and by averaging over all sets obtained the following result:

$$\frac{L_f}{L_f^{Predicted}} = 1.3 \pm 0.03.$$

The parameter sets tested are all possible combinations of the following values:

|                         |            |
|-------------------------|------------|
| $D_M[\mu m^2 sec^{-1}]$ | 80,100,150 |
| $\alpha_M[h^{-1}]$      | 5,10,20    |
| $\eta[a.u.]$            | 1          |
| $D_E[\mu m^2 sec^{-1}]$ | 10,100     |
| $\alpha_E[h^{-1}]$      | 0.008,0.01 |
| $\beta_E[a.u.]$         | 1,2        |
| $T_{Expander}[a.u.]$    | 0.01       |
| $\theta$                | 0.5        |
| $L_0[\mu m]$            | 10         |
| # runs                  | 72         |
| # valid runs            | 72         |

**4.8. The role of advection and dilution in MDDR dynamics.** In the absence of the expander, the morphogen evolution equation (5) consists of four different terms,

- Morphogen diffusion, modeled by  $D_M M_{xx}$ .
- Morphogen degradation, modeled by  $\alpha_M M$ .
- Advection, modeled by  $u M_x$ , for flow rate  $u$  and
- Dilution on account of growth, modeled by  $u_x M$ .

In order to compare the relative contributions of each of the above terms (and the underlying physical effects) to the global dynamics, we calculate the amplitudes (as a function of the tissue domain) of each term and plot these amplitude at different time snapshots in SI Figure 13. The amplitudes are calculated from the morphogen concentration  $M$  and flow rate  $u$  using simple finite differences. The parameter set used to generate SI Figure 13 is exactly the same as the parameter set used to generate Figure 3, i.e, Table 4.4.2.

From SI figure 13, it is clear that initially and for a short period of time (about  $T=5$ ), the advection and dilution terms are indeed comparable to the morphogen degradation. However, after this short initial transient, the growth rate slows and the advection and dilution terms rapidly decay in amplitude as compared to the morphogen degradation. As shown in Figure 3, the morphogen gradient continues to scale with tissue size and the tissue continues to grow. In fact, the tissue grows about two to three fold during this time window. In this case, the initially comparable dilution and advection were enough to yield scaling and uniform growth, through the MDDR mechanism.

To further test the role of advection and dilution in the global dynamics, we performed the following simulations:

**4.8.1. SI Figure 14.** First, we simulated tissues that do not grow. In such tissues, the morphogen is secreted at the source and diffuses through the length of the tissue, while being subject to degradation. To do so, we set the flow rate  $u \equiv 0$  in the morphogen evolution equation (5) and use the

following parameters:

|                         |            |
|-------------------------|------------|
| $D_M[\mu m^2 sec^{-1}]$ | 10         |
| $\alpha_M[h^{-1}]$      | 0.1        |
| $\eta[a.u.]$            | 1          |
| $L_0[\mu m]$            | 10, 20, 40 |

The results are shown in SI Figure 14 (a,b,c,d). In SI Figure 14 (a,b), we consider the spread of morphogen (via diffusion) for three different tissue lengths. The corresponding steady state morphogen concentration in both absolute and relative coordinates is plotted. As seen from SI Figure 14 (b), the morphogen gradient does not scale as the normalized morphogen concentration depends on the absolute position in the tissue. Thus, pure diffusion and degradation are not enough to provide scaling.

In SI figure 14 (c,d), we plot the temporal dynamics of a non-growing tissue of tissue length  $L = 20$ . The other parameters are the same as in the previous table. As seen from SI Figure 14 (c,d), the morphogen gradient diffuses into the tissue and reaches a steady state when the diffusion balances the degradation. But as expected (see [2]), the gradient does not scale in any sense as the concentration depends on the absolute position.

In contrast to this case, we consider the situation of a tissue that grows with the MDDR mechanism. The corresponding parameters are reported in the following table:

|                         |            |
|-------------------------|------------|
| $D_M[\mu m^2 sec^{-1}]$ | 10         |
| $\alpha_M[h^{-1}]$      | 0.1        |
| $\eta[a.u.]$            | 1          |
| $\theta$                | 1          |
| $L_0[\mu m]$            | 10, 20, 40 |

The parameters for diffusion, degradation, initial tissue length and morphogen flux are exactly the same as in previous of non-growing tissue. The results for this simulation are plotted in SI Figure 14 (e,f). As seen before in Figure 3, the morphogen gradient scales with the growing tissue in this case (see SI Figure 14 f). Thus, the role of advection and dilution is essential in producing scaling of the morphogen gradient through the MDDR growth mechanism.

This role can be further explained with the following observation. Once the tissue grows, advection and dilution are inevitable consequences of growth. These terms will be small for most of the dynamics as growth rate is exponentially decaying (see SI figure 13 and also the analytical formula (30)) but they will not be negligible initially. We start from zero (or constant) morphogen initial condition and have morphogen flux coming into the tissue. As our growth law calculates the temporal relative change in concentration, the growth rate has to be high and non-negligible in comparison to degradation

initially (as morphogen starts coming in). Growth rate then decreases, as we observe analytically and in all the simulations.

Again from the simulations, we observe that the dynamics starts with an initial (very short) transient phase that is due to the growth law being based on relative change. During this transient, the morphogen gradient is formed and it is not yet scaled. The scaling happens once this transient is over and the gradient can be described in terms of the formula (30) for some final tissue length  $L_f$  and gradient decay length  $\lambda$ . Then, the tissue continues growing and the gradient continues to scale until steady state is reached at a time scale of  $\frac{1}{\alpha_M}$ . During this rather long phase, advection and dilution terms are negligible in comparison to degradation (see SI figure 13). The contribution of advection and dilution is to determine the scaled form the gradient that will take on at steady state i.e, determining the morphogen decay length  $\lambda$  in (30).

4.8.2. *SI figure 15.* To further emphasize the role of the dilution and advection, we simulated a system which grows according to MDDR, but without a dilution term in the morphogen evolution equation, on multiple parameter sets and compared the results with the same system with a dilution term. The results are presented in SI figure 15 which is generated with the following parameters:

For SI figure 15, a-h, we use,

|                         |     |
|-------------------------|-----|
| $D_M[\mu m^2 sec^{-1}]$ | 100 |
| $\alpha_M[h^{-1}]$      | 0.1 |
| $\eta[a.u.]$            | 10  |
| $\theta$                | 0.5 |
| $L_0[\mu m]$            | 10  |

For SI figure 15, i-p, we use,

|                         |     |
|-------------------------|-----|
| $D_M[\mu m^2 sec^{-1}]$ | 100 |
| $\alpha_M[h^{-1}]$      | 0.1 |
| $\eta[a.u.]$            | 1   |
| $\theta$                | 0.5 |
| $L_0[\mu m]$            | 10  |

For SI figure 15, q-x, we use,

|                         |     |
|-------------------------|-----|
| $D_M[\mu m^2 sec^{-1}]$ | 100 |
| $\alpha_M[h^{-1}]$      | 0.1 |
| $\eta[a.u.]$            | 1   |
| $\theta$                | 1.2 |
| $L_0[\mu m]$            | 10  |

The results of this study (eliminating dilution in the morphogen evolution) can be divided into these 4 cases:

- Discarding the dilution term results in: larger final size, yet poorer scaling and lack of uniform growth.

- Discarding the dilution term results in: smaller final size, yet reasonably good scaling but without uniform growth.
- Discarding the dilution term results in: smaller final size, non-uniform growth and bad scaling.
- Discarding the dilution term results in a non-biological morphogen profile (too shallow) or non-biological growth (step function like growth)

As we predicted, in all simulations removing the dilution term resulted in different  $\lambda'$ . Scaling was still retained in most cases while uniform growth was more sensitive to the removal of dilution. At times, the profiles obtained were non biological: too shallow due to not enough morphogen degradation in the absence of dilution or step like growth. These results are consistent with our understanding of the role of dilution and advection as described above. Since the advection term is always smaller or similar in amplitude to dilution, we expect similar results when eliminating it from the morphogen equation.

Summarizing the above discussion, we would like to point out that advection and dilution play an essential role in the MDDR mechanism, particularly for the initial period of growth. In the absence of these terms or when the terms are negligible compared to degradation for the whole growth period, MDDR may not suffice for scaling and additional mechanisms, such as expansion-repression, might be needed. Moreover, advection and dilution decay rapidly in amplitude with time and are negligible compared to degradation (SI Figure 13) for most of the growth window. Hence, our simulation results are consistent with experimental findings of slow growth (with negligible advection and dilution) in the third instar.

#### REFERENCES

- [1] L. D. Landau and E. M. Lipschitz. Fluid Mechanics, 2nd edition, *Butterworth Heinemann*, 1987, 532 pp.
- [2] D. Ben-Zvi., and N. Barkai, Scaling of morphogen gradients by an expansion-repression integral feedback control. *Proc Natl Acad Sci U S A* 2010, 107, 6924-6929.

**Figure S1. ExR improves scaling and becomes more effective as growth rate  $q$  decreases.**

In plots (a)-(i) Morphogen or expander level as a function of position in the tissue is shown for 10 evenly spaced time points throughout the dynamics, from earliest time point in blue to latest time point in red. In all plots the same parameter set is simulated for various values of the growth rate  $q$ , with and without ExR.

(a,d,g): Morphogen relative level (normalized to the level at the source) as a function of relative position ( $x/L$ ) in the tissue at various times **without ExR**: For  $q=1$  [1/h] in plot (a), for  $q=0.1$  [1/h] in plot (d) and for  $q=0.001$  [1/h] in plot (g).

(b,e,h): Morphogen relative level (normalized to the level at the source) as a function of relative position ( $x/L$ ) in the tissue at various times **with ExR**: For  $q=1$  [1/h] in plot (b), for  $q=0.1$  [1/h] in plot (e) and for  $q=0.001$  [1/h] in plot (h).

(c,f,i): Expander level as a function of position in the tissue at various times: for  $q=1$  [1/h] in plot (c), for  $q=0.1$  [1/h] in plot (f) and for  $q=0.001$  [1/h] in plot (i).

(j) Scaling error defined as:  $\left| \frac{\partial \lambda}{\partial L} L \right|$  as a function of  $q$ , with ExR. With constant  $q$ , the scaling error in the simulation converges to a constant after a certain time  $T$ , that constant is shown in the plot.

**Figure S2. With MDDR and ExR scaling is achieved even for rapid growth rates.**

Scaling error defined as  $\left| \frac{\partial \lambda}{\partial L} L \right|$  as a function of growth rate  $q = \frac{L}{L_0}$  for a particular parameter set. In the blue solid line for MDDR and ExR feedback and in the black dashed line for the same parameter set only with a constant  $q$  growth function and ExR feedback. With constant  $q$ , the scaling error in the simulation converges to a constant after a certain time  $T$ , that constant is shown in the plot.

**Figure S3. The effect of ExR on tissue growth and duration of growth.**

- a) The effect of ExR on fold change in tissue length:  $\log_2 \frac{(L_f/L_0)_{with\ ExR}}{(L_f/L_0)_{NO\ ExR}}$  for various  $\lambda_M = \sqrt{\frac{D_M}{\alpha_M}}$  and  $\alpha_M$ . Final size is increased by ExR for a large variety of parameter sets. This increase depends on  $\lambda_M = \sqrt{\frac{D_M}{\alpha_M}}$  which is the length scale of the morphogen.
- b) The effect of ExR on growth duration:  $\log_2 \frac{(t_{ss})_{with\ ExR}}{(t_{ss})_{NO\ ExR}}$  for various  $\lambda_M = \sqrt{\frac{D_M}{\alpha_M}}$  and  $\alpha_M$ . ExR significantly prolongs dynamics which allows for further growth and a larger final size. The expander's effect mainly depends on  $\alpha_M$ , which is the quantity modulated by the expander.

**Figure S4. Sensitivity of fold change in size to model parameters, with vs. without ExR.**

Dependence of fold change of the final tissue size compared with initial tissue size on the morphogen diffusion coefficient (a,f), morphogen degradation rate (b,g), morphogen flux (c,h), growth parameter (d,i) and initial size (e,i). (a-e) describe a system with a morphogen dependent growth law and an expander, (f-j) describe the same system without an expander. Sensitivity,  $S$ , of final size  $L_f$  to a parameter  $p$  was determined by simulating the parameter set with different values of  $p$  and calculating the average over 10 values  $p$  of  $\frac{p}{L_f} \left| \frac{\partial L_f}{\partial p} \right|$ .

**Figure S5. Sensitivity of morphogen gradient length scale to model parameters, with vs. without ExR.**

The gradient scales, and is well described by an exponential with a length scale of  $\lambda$  in the relative coordinates. Sensitivity of  $\lambda$  to a parameter  $p$  was determined by simulating the wild type parameter set with different values of  $p$  and calculating the average over 10 values  $p$  of  $\frac{p}{\lambda} \left| \frac{\partial \lambda}{\partial p} \right|$ . (a-e) describe a system with a morphogen dependent growth law and an expander, (f-j) describe the same system without an expander.

**Figure S6. Sensitivity of fold change in size and morphogen gradient length scale to ExR parameters.**

Sensitivity  $S$  (defined as in figure S4,S5) of final tissue size relative to initial size (a-d) and the morphogen gradient relative length scale (e-h) to variations of expander parameters: expander diffusion coefficient (a,e), expander degradation rate (b,f), expander production rate (c,g), morphogen threshold concentration above which expander production is repressed (d,h).

**Figure S7. For parameter sets which did not scale under the  $\alpha_M \gg q$  regime, adding ExR improves scaling and uniform growth.**

a-d morphogen dependent growth only.

a) growth rate  $q$  and morphogen degradation rate  $\alpha_M$  as a function of time; b) the tissue grows less, and growth takes less time; c) the gradient fails to scale, x-axis in relative coordinates; d) scaling error remains high throughout the growth.

(e-h) Adding ExR to the system with the same parameters affects the dynamics dramatically.

e) Growth rate  $q$  and morphogen degradation rate  $\alpha_M$  as a function of time. Note that  $\alpha_M$  decreases as a result of expander activity; f) growth is longer and the tissue grows extensively;

g) The tissue shows very good scaling, x-axis in relative coordinates; h) scaling error is very low in most of the dynamics.

i) The same system with ExR only and spatially uniform external growth with  $q=0.01$ . The simulation was run until the tissue grew 2 fold, ExR alone resulted in poor scaling.

**Figure S8. Simulation of Eq.7 (SI) with a noisy  $\theta$ .**

- a) Distribution of  $\theta$ .
- b) Mean relative morphogen concentration (Y-axis) vs. relative position (X-axis) for several time points  $T[h]$  shows scaling.
- c) Mean proliferation rate (Y-axis)  $[1/h]$  vs. relative position (X-axis) for several time points  $T[h]$  shows uniform growth. All statistics were computed with 500 samples.

**Figure S9. Numerical solution of the ODE system 61 and 67 (SI) using ODE45 in MATLAB.**

The figure clearly shows that the expander concentration and the tissue length converge to steady state values given by 68 (SI) for this parameter set. The same convergence holds for all tested parameter sets (approximately 1000).

The parameter values are:  $E(t=0)=1[a.u]$ ;  $L(t=0)=1.66[\mu m]$ ;  $c^*=0.5$ ;  $\beta_E=2[a.u]$ ;  $\alpha_E=0.1[1/h]$ ;  $D_M=2[\mu m^2/h]$ ;  $\alpha_M=0.1[1/h]$

**Figure S10. Simulating the two compartments of the wing disc with different conditions in each compartment.**

a-c:

The left compartment which is at  $-1 \leq x \leq 0$ , was simulated with no expander production. The right compartment which is at  $0 \leq x \leq 1$ , was simulated with the same parameters as the left but with expander production (Fig 2 parameters, matching measured wing disc quantities). In both compartments, growth was according to MDDR.

- a) Fold change increase in tissue size as a function of time.
- b) Relative morphogen level as a function of relative position in the tissue.
- c) Expander level as function of relative position in the tissue at various times.

d-f:

The left compartment ( $-1 \leq x \leq 0$ ) and the right compartment ( $0 \leq x \leq 1$ ) were simulated with the same parameters (Fig 2 parameters, matching measured wing disc quantities) except for the growth parameter  $\theta$  which was 0.5 in the right compartment and 0.8 in the left. In both compartments, growth was according to MDDR.

- d) Fold change increase in tissue size as a function of time.
- e) Relative morphogen level as a function of relative position in the tissue.
- f) Expander level as function of relative position in the tissue at various times.

g-i:

The left compartment ( $-1 \leq x \leq 0$ ) and the right compartment ( $0 \leq x \leq 1$ ) were simulated with the same parameters (Fig 2 parameters, matching measured wing disc quantities) except for the growth parameter  $\theta$  which was 0.5 in the right compartment and 0.8 in the left. In both compartments, growth was according to MDDR for  $t \leq t_0$ . For the rest of the simulation,  $t_0 \leq t \leq T$ , growth was determined by an external input. The  $t_0$  chosen was  $0.5 T$ .

- g) Fold change increase in tissue size as a function of time.
- h) Relative morphogen level as a function of relative position in the tissue.
- i) Expander level as function of relative position in the tissue at various times.

**Figure S11. Simulating MDDR with ExR for different conditions.**

a-b: Increasing morphogen flux

- a) Relative morphogen level as a function of relative position in the tissue.
- b) Growth rate as a function of relative position in the tissue at various times.

c-d: Absorbing B.C for the morphogen on the distal edge of the tissue

- c) Relative morphogen level as a function of relative position in the tissue.
- d) Growth rate as a function of relative position in the tissue at various times.

e-f: Nonlinear morphogen degradation

- e) Relative morphogen level as a function of relative position in the tissue.
- f) Growth rate as a function of relative position in the tissue at various times.

g-h: Nonlinear expander degradation

- g) Relative morphogen level as a function of relative position in the tissue.
- h) Growth rate as a function of relative position in the tissue at various times.

i-j: Different forms of  $h(M)$  and  $\alpha(E)$

- i) Relative morphogen level as a function of relative position in the tissue.
- j) Growth rate as a function of relative position in the tissue at various times.

**Figure S12. Simulating MDDR alone for different conditions.**

a-b: Increasing morphogen flux

- a) Relative morphogen level as a function of relative position in the tissue.
- b) Growth rate as a function of relative position in the tissue at various times.

c-d: Absorbing B.C for the morphogen on the distal edge of the tissue

- c) Relative morphogen level as a function of relative position in the tissue.
- d) Growth rate as a function of relative position in the tissue at various times.

e-f: Nonlinear morphogen degradation

- e) Relative morphogen level as a function of relative position in the tissue.
- f) Growth rate as a function of relative position in the tissue at various times.

**Figure S13. Comparing the amplitude of the 4 terms of eq. 2a for several time points.**

The amplitude of the 4 terms of eq. 2a for an MDDR alone system:

$$\text{Diffusion: } D_M \cdot M_{xx}$$

$$\text{Degradation: } \alpha_M \cdot M$$

$$\text{Advection: } u \cdot M_x$$

$$\text{Dilution: } u_x \cdot M$$

For consecutive time points as stated in the title of each plot.

**Figure S14. Comparing morphogen dynamics with vs. without growth.**

a-b: System without growth, the steady state of the morphogen gradient is plotted for several tissue lengths. In the absence of growth, the gradient doesn't scale with tissue length.

- a) Absolute morphogen level as a function of absolute position in the tissue.
- b) Relative morphogen level as a function of relative position in the tissue.

c-d: System without growth simulated for a fixed tissue length. Temporal dynamics of the gradient is shown for several time points (see legend).

- c) Absolute morphogen level as a function of absolute position in the tissue.
- d) Relative morphogen level as a function of relative position in the tissue.

e-f: System with growth according to MDDR. Temporal dynamics of the gradient is shown for several time points (see legend).

- e) Absolute morphogen level as a function of absolute position in the tissue.
- f) Relative morphogen level as a function of relative position in the tissue.

All simulations were done with the same parameters (see SI for values). Comparing the 2 bottom rows shows morphogen dynamics is different with Vs. without growth.

**Figure S15. Comparing morphogen dynamics with and without dilution.**

In all simulation growth was according to MDDR without an expander. The morphogen evolution equation did or did not include a dilution term (see legend).

a-h: Discarding dilution results in: larger final size, lesser scaling and uniform growth.

- a-d: Morphogen evolution equation with dilution
- e-h: Morphogen evolution equation without dilution

i-p: Discarding dilution results in: smaller final size, lesser scaling and uniform growth.

i-l: Morphogen evolution equation with dilution

m-p: Morphogen evolution equation without dilution

q-x: Discarding dilution results in: smaller final size, less uniform growth and bad scaling.

q-t: Morphogen evolution equation with dilution

u-x: Morphogen evolution equation without dilution

# Fig. S1

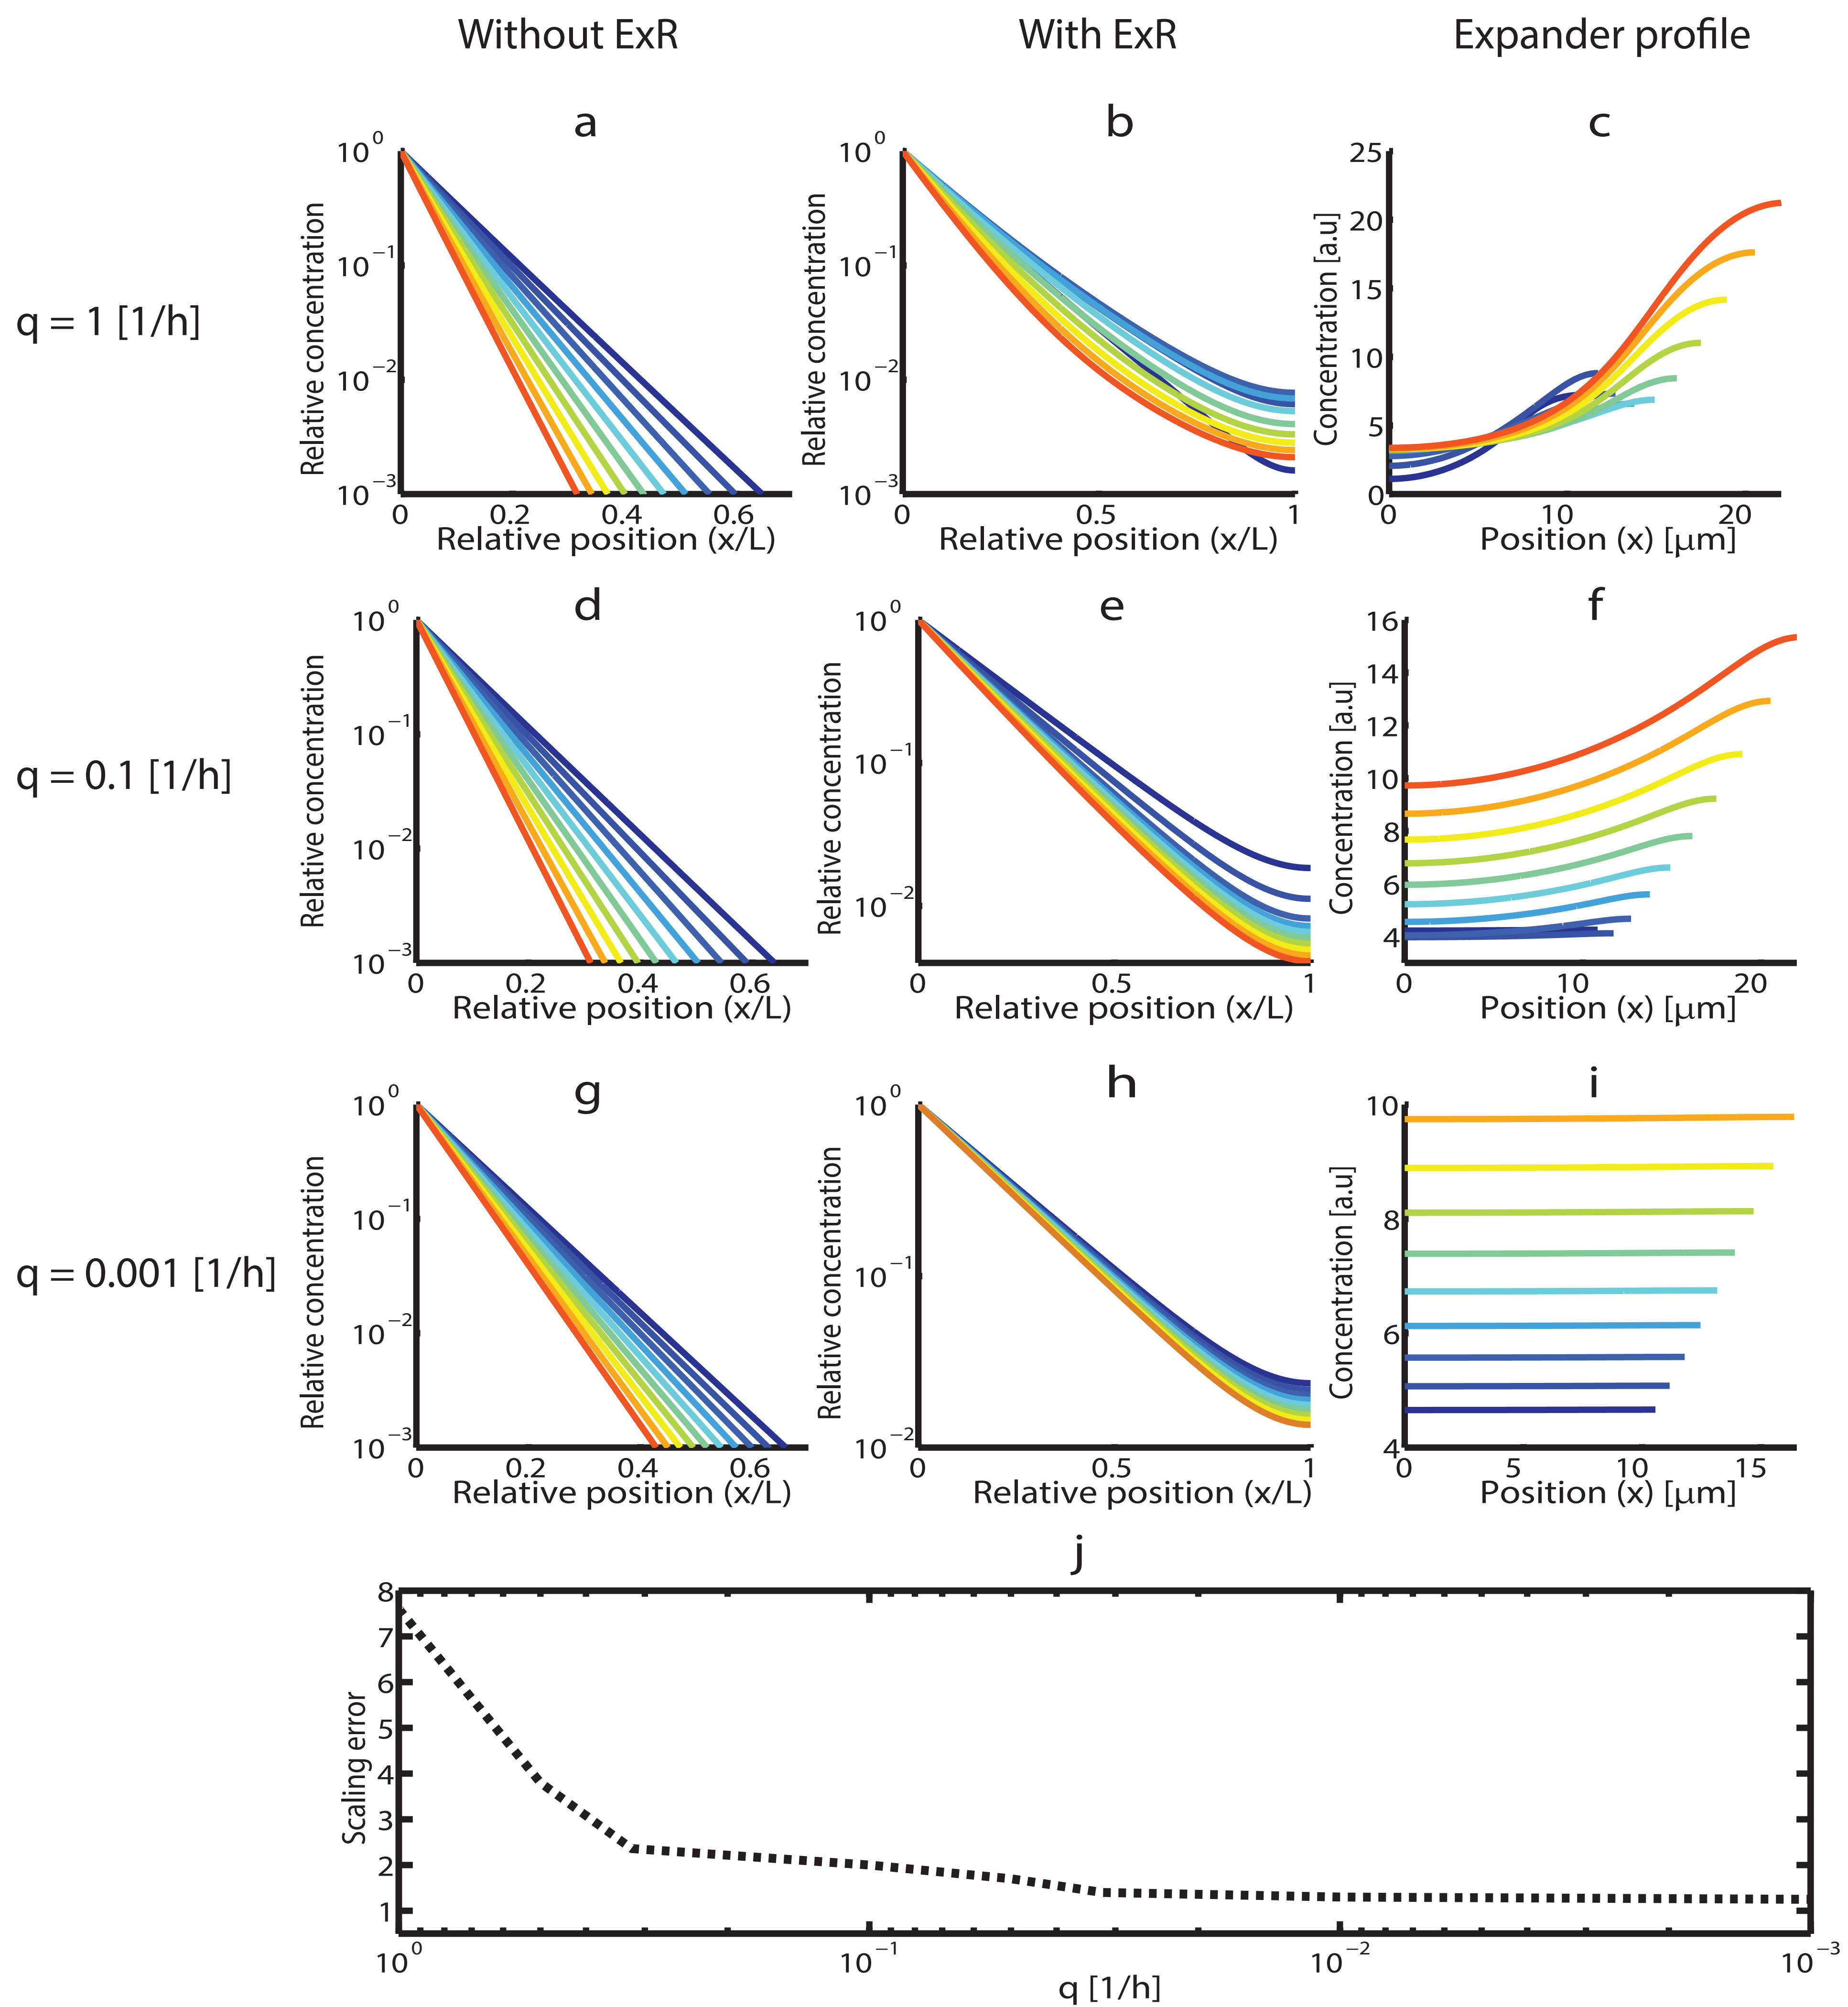

Fig. S2

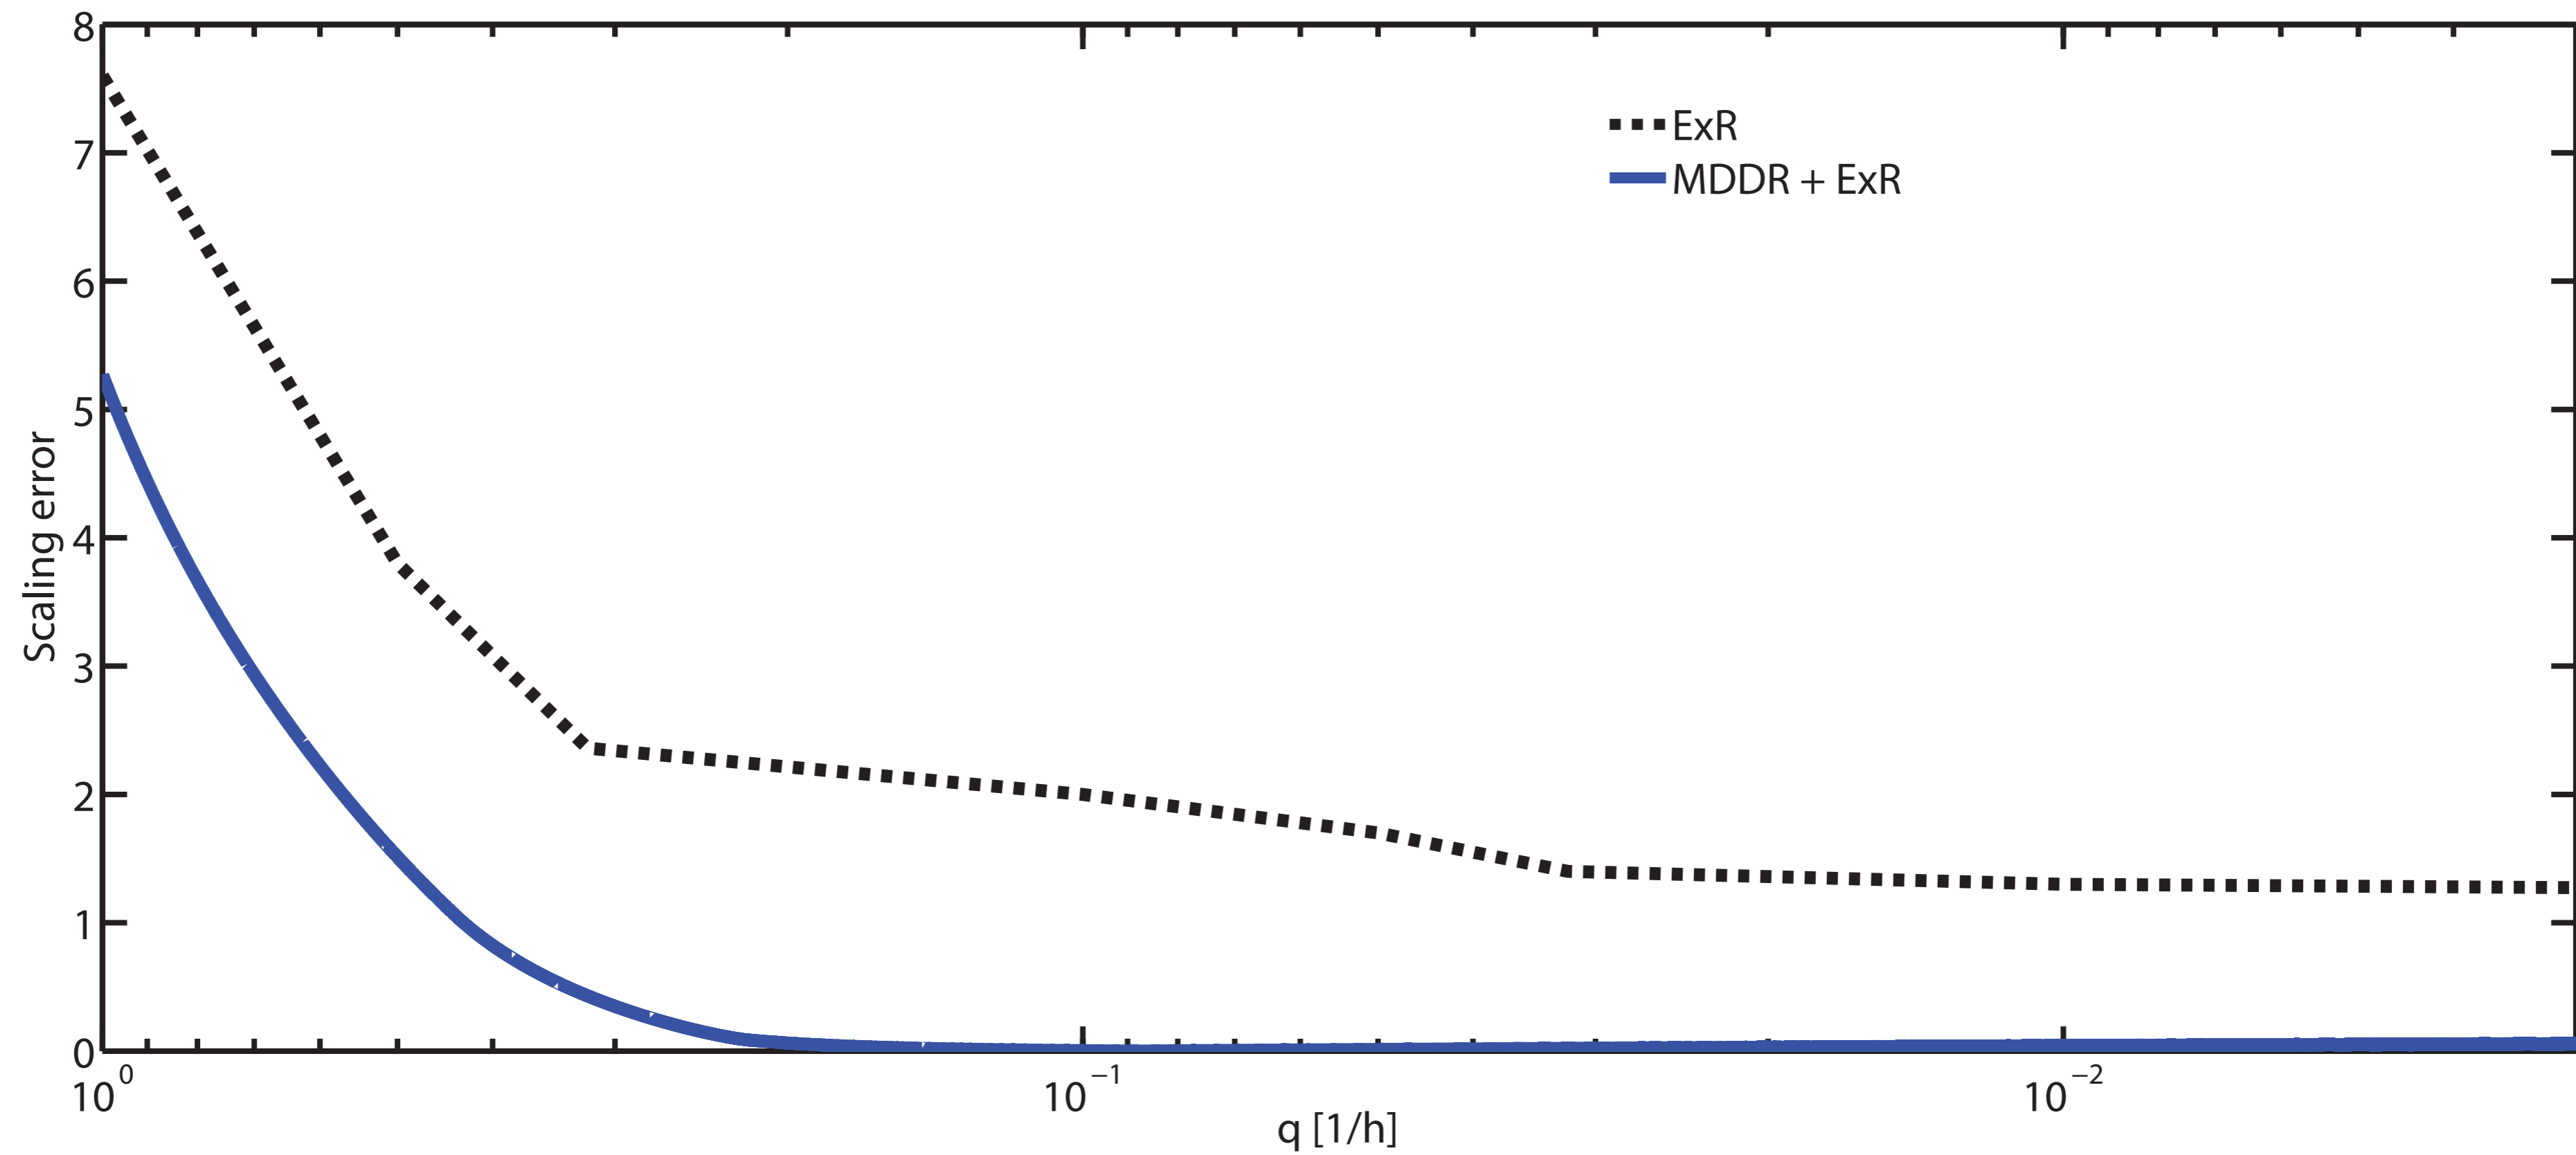

Fig. S3

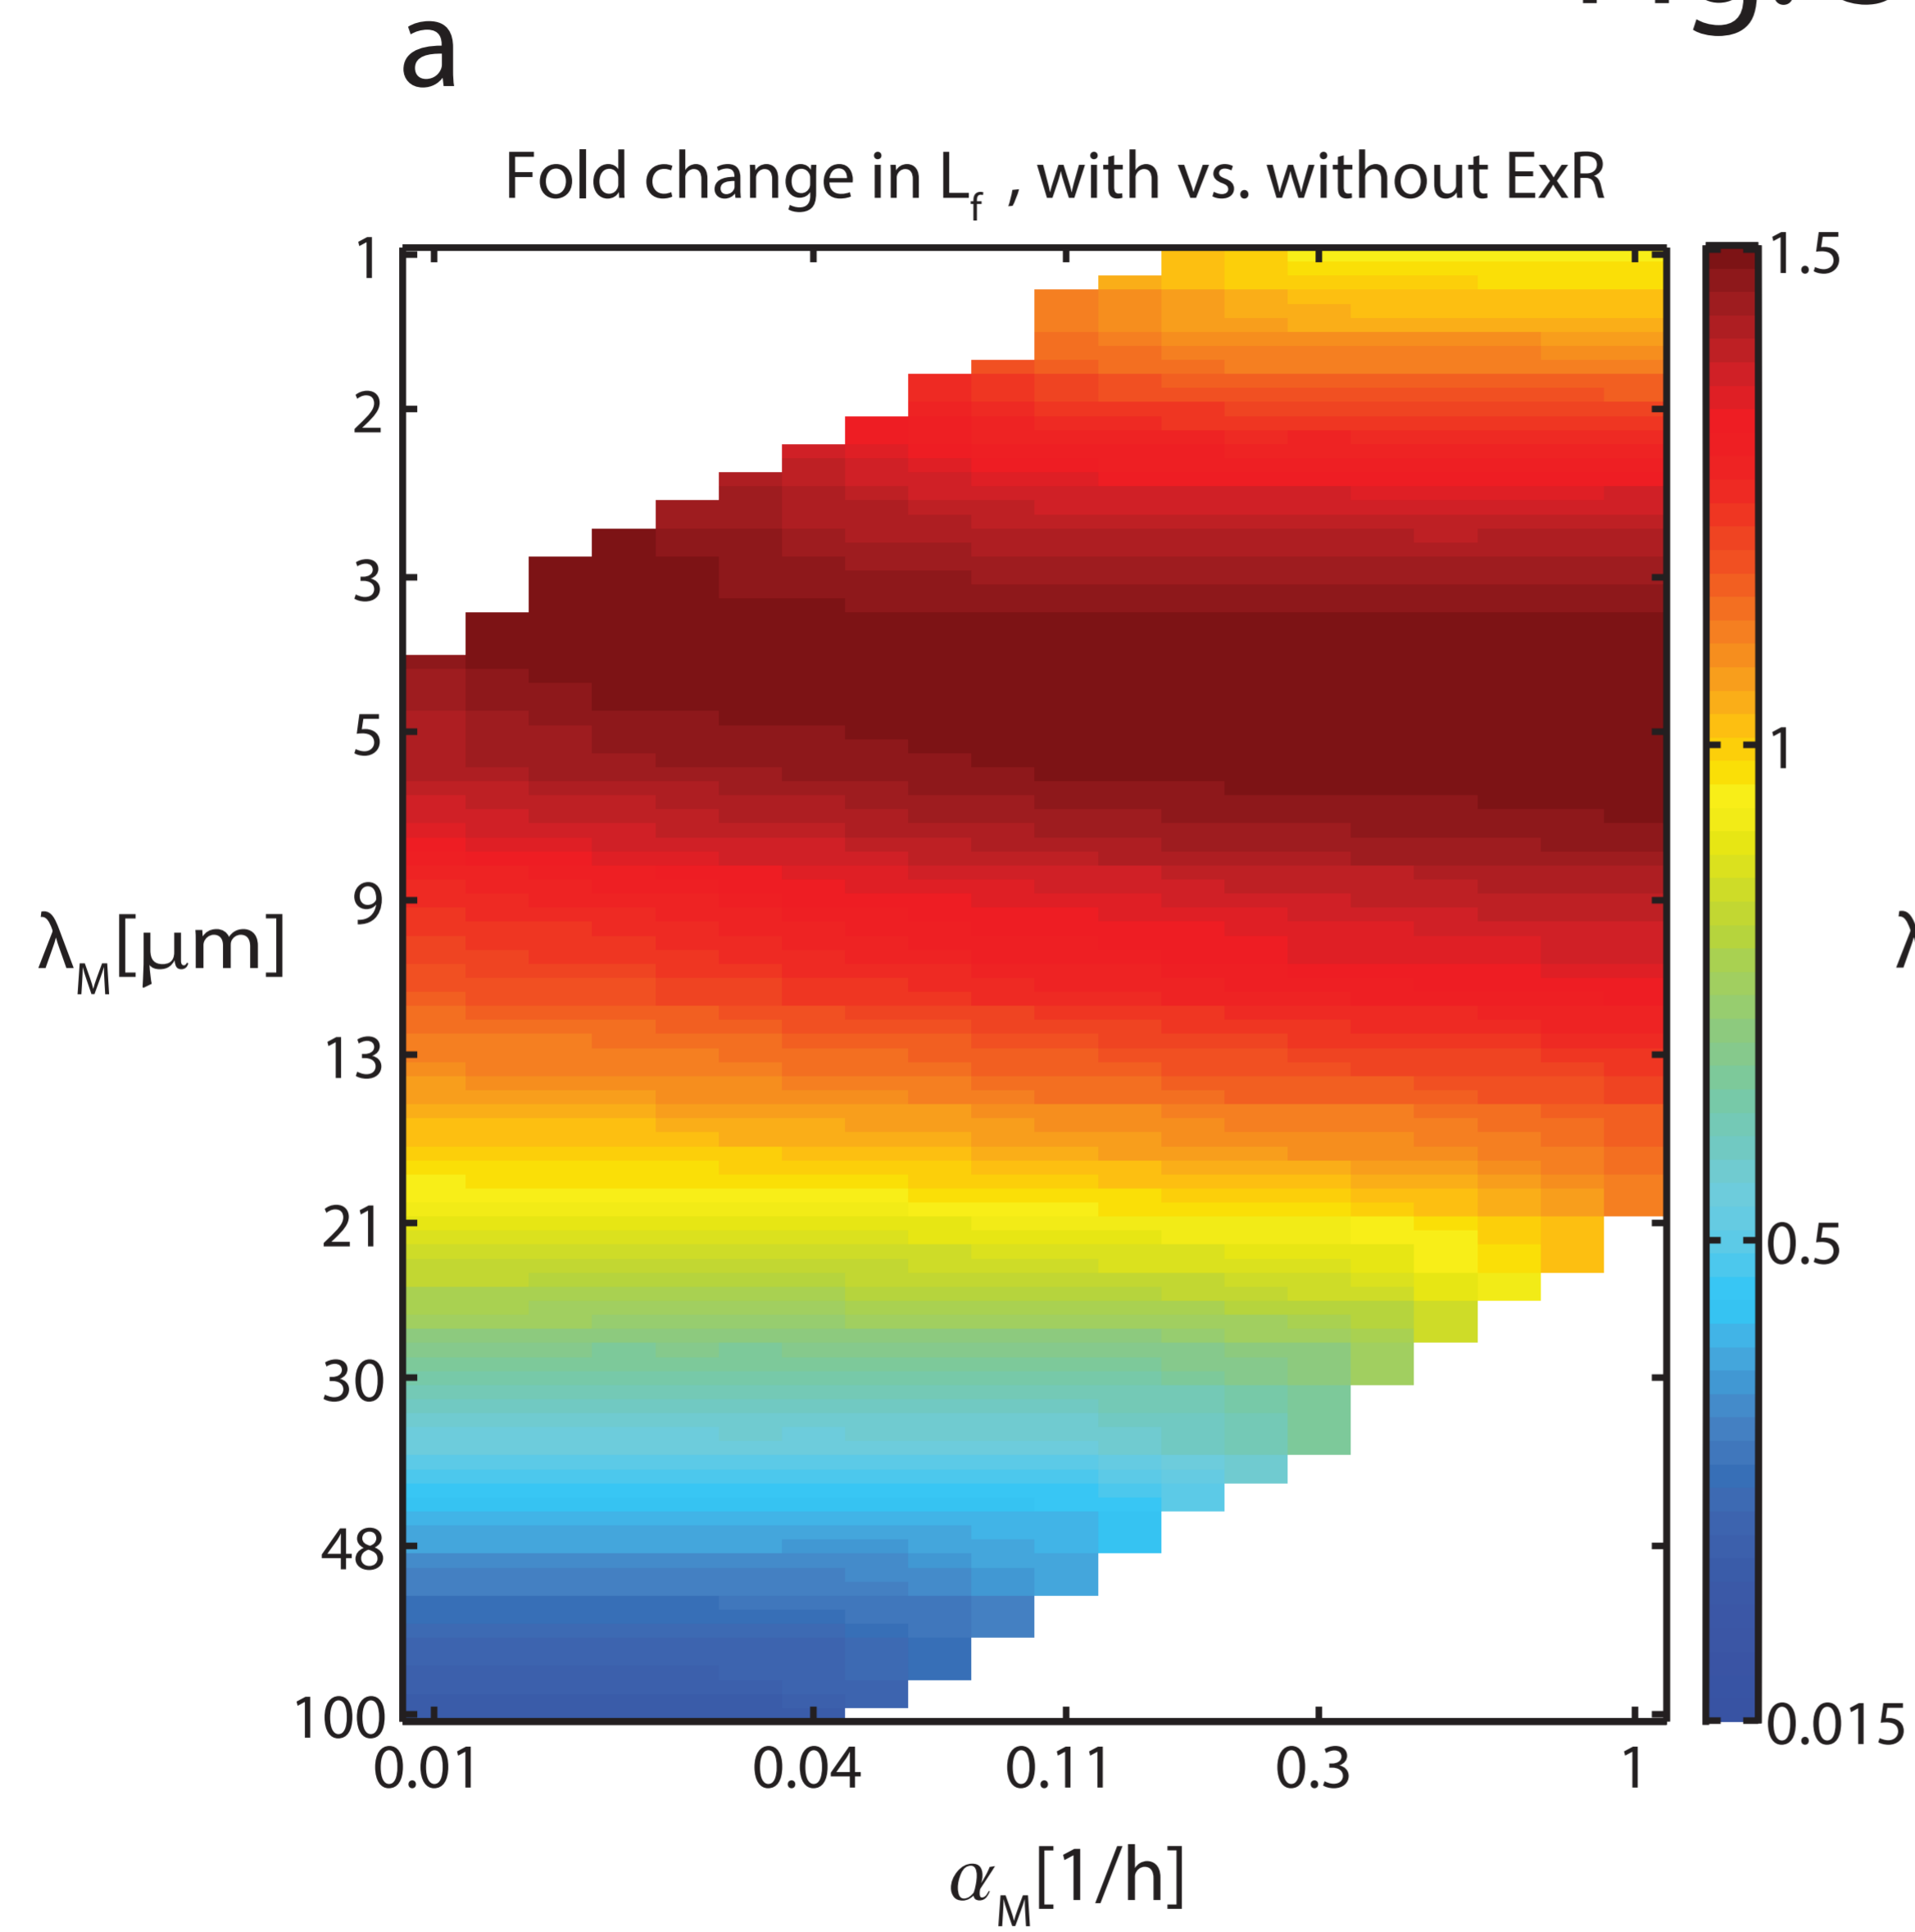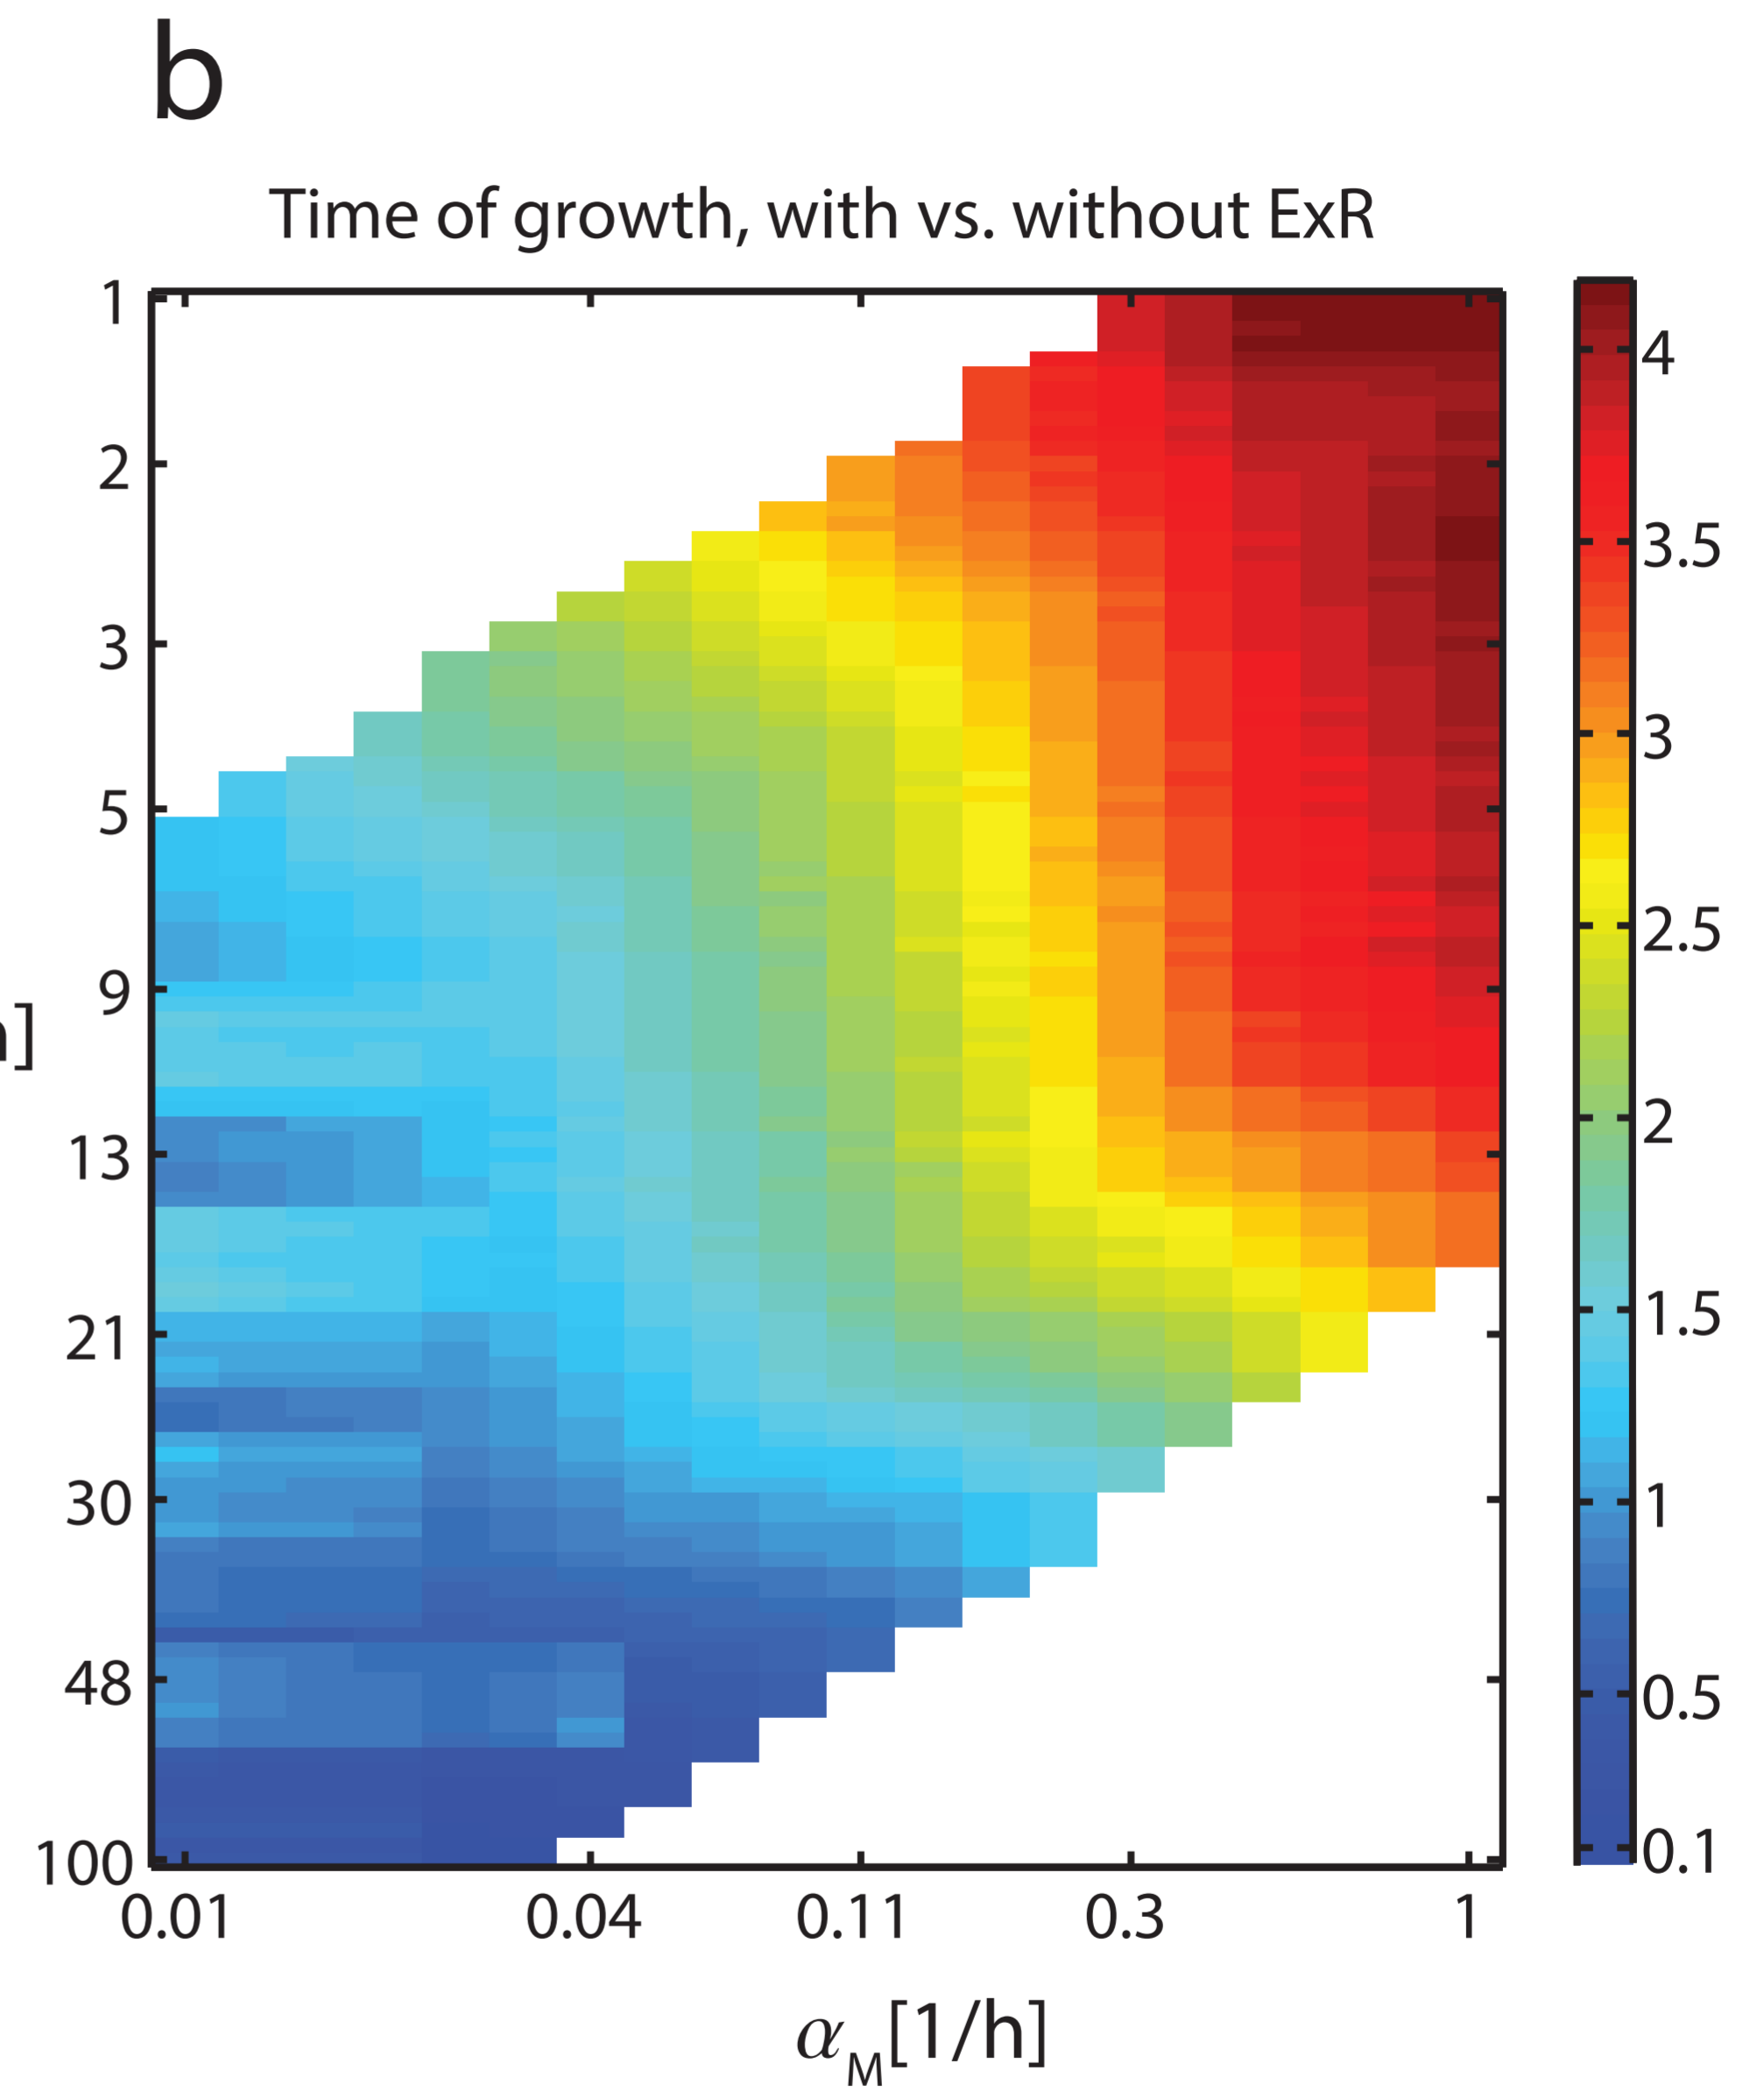

# Fig. S4

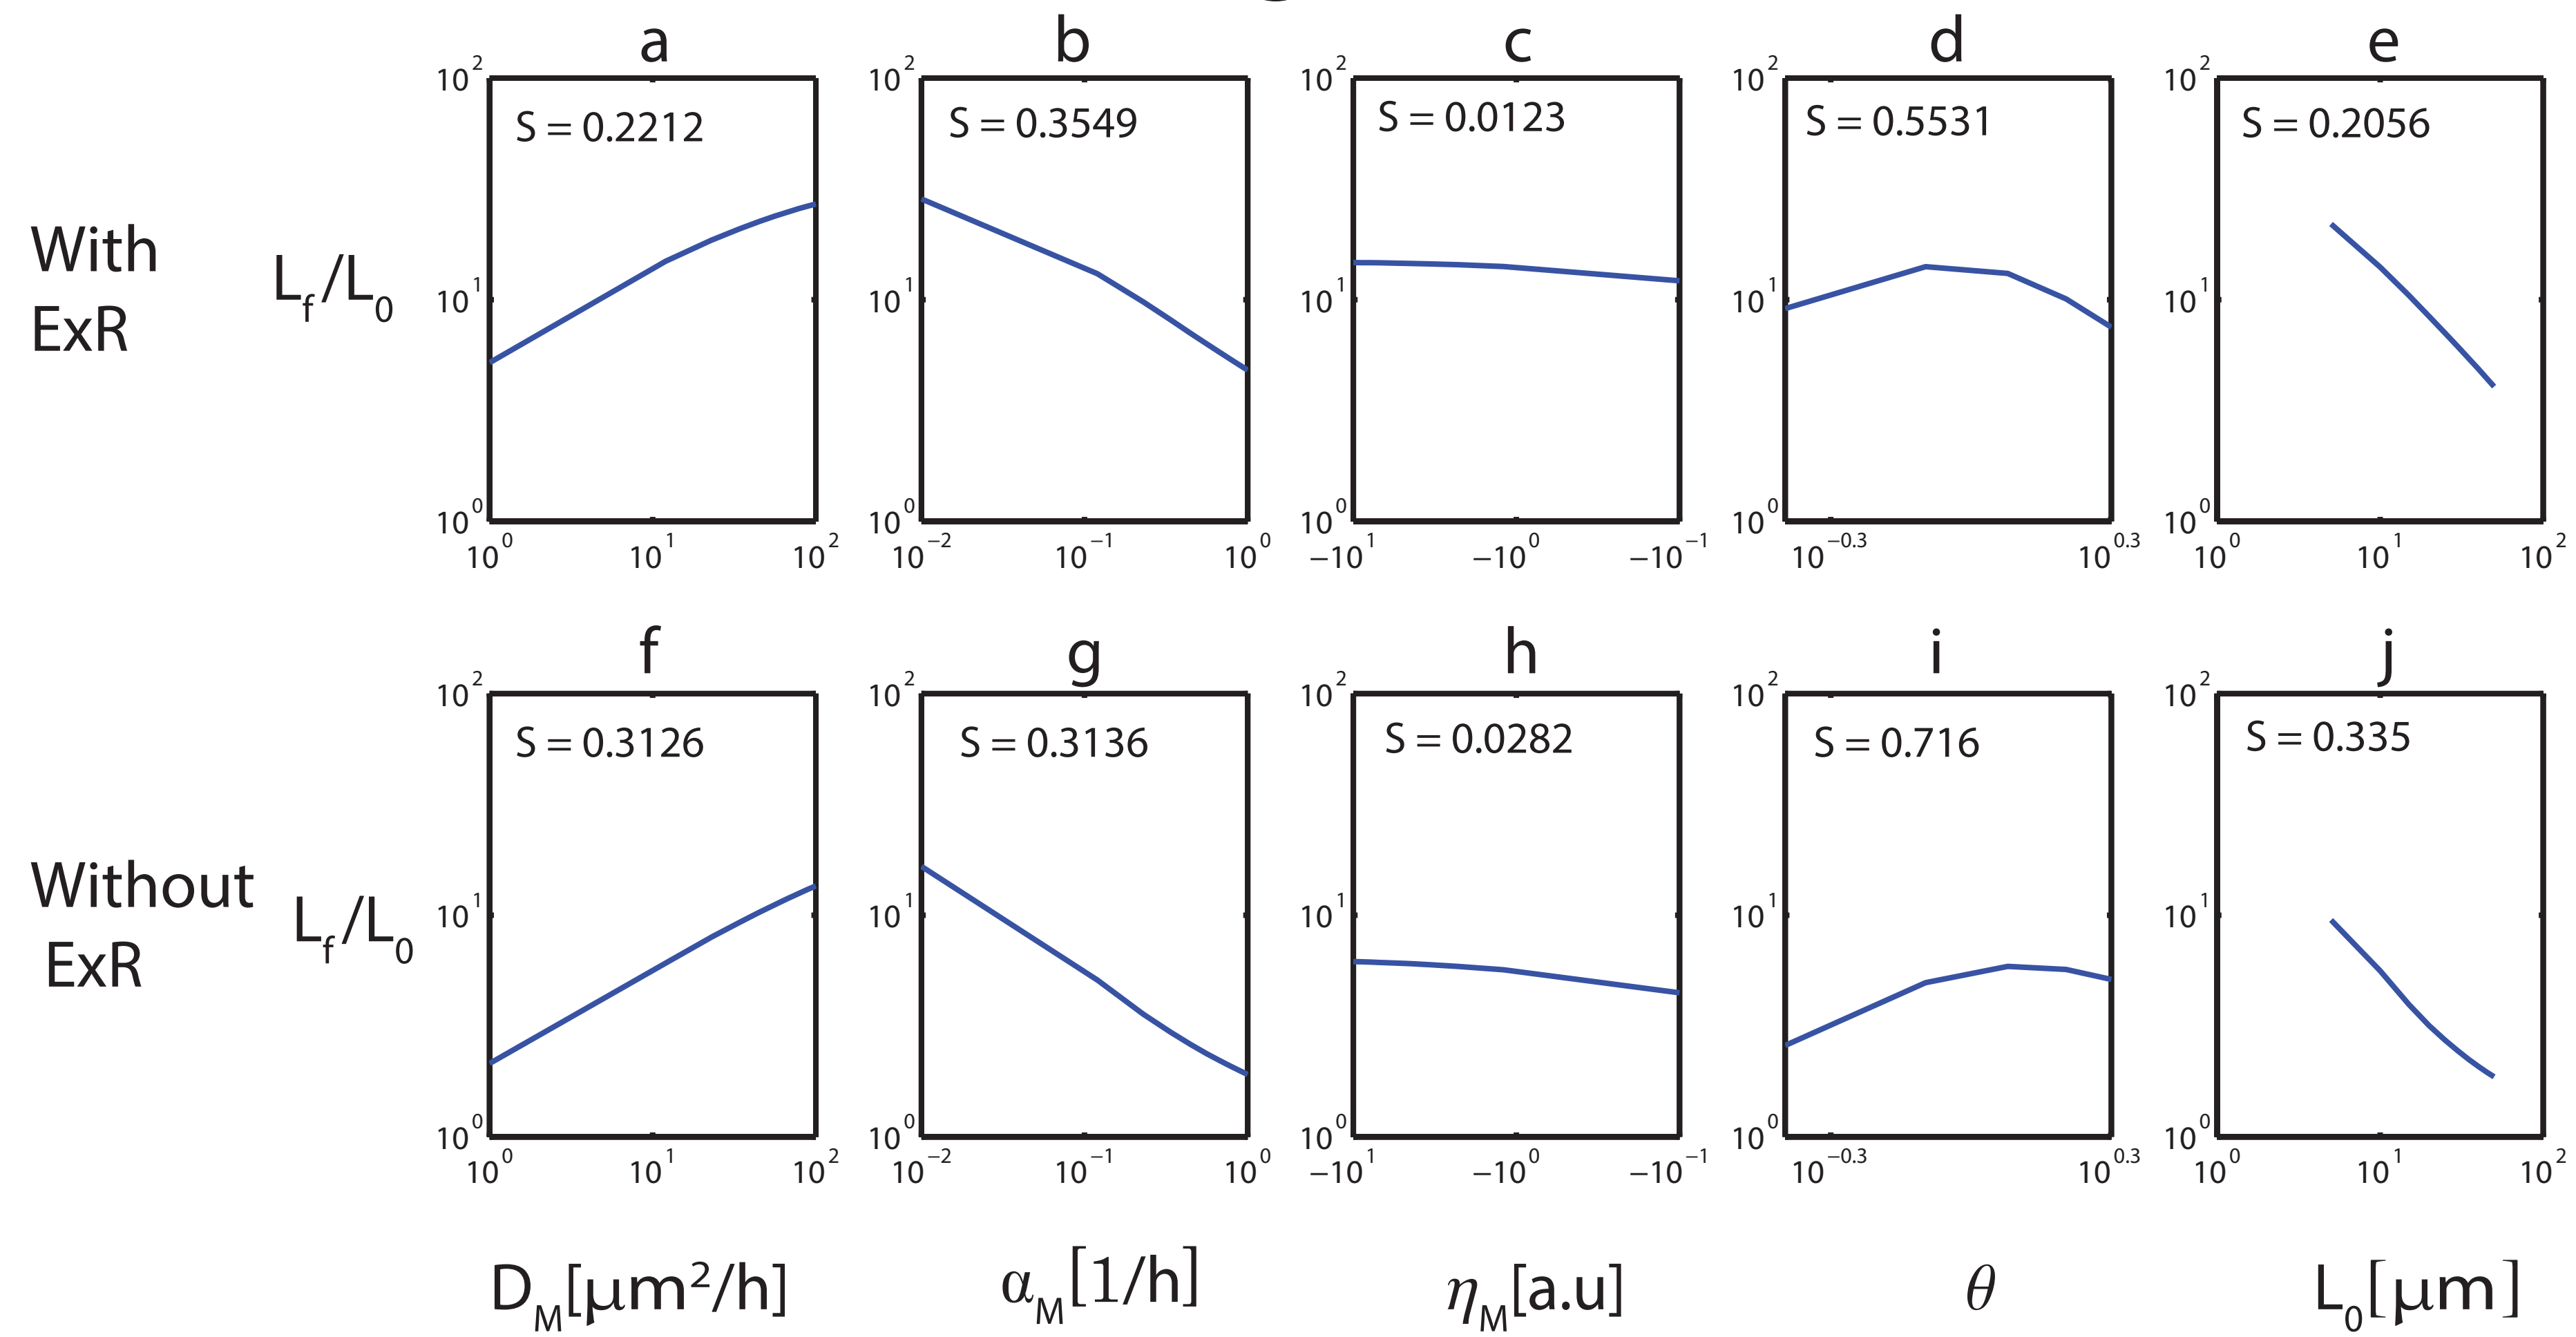

Fig. S5

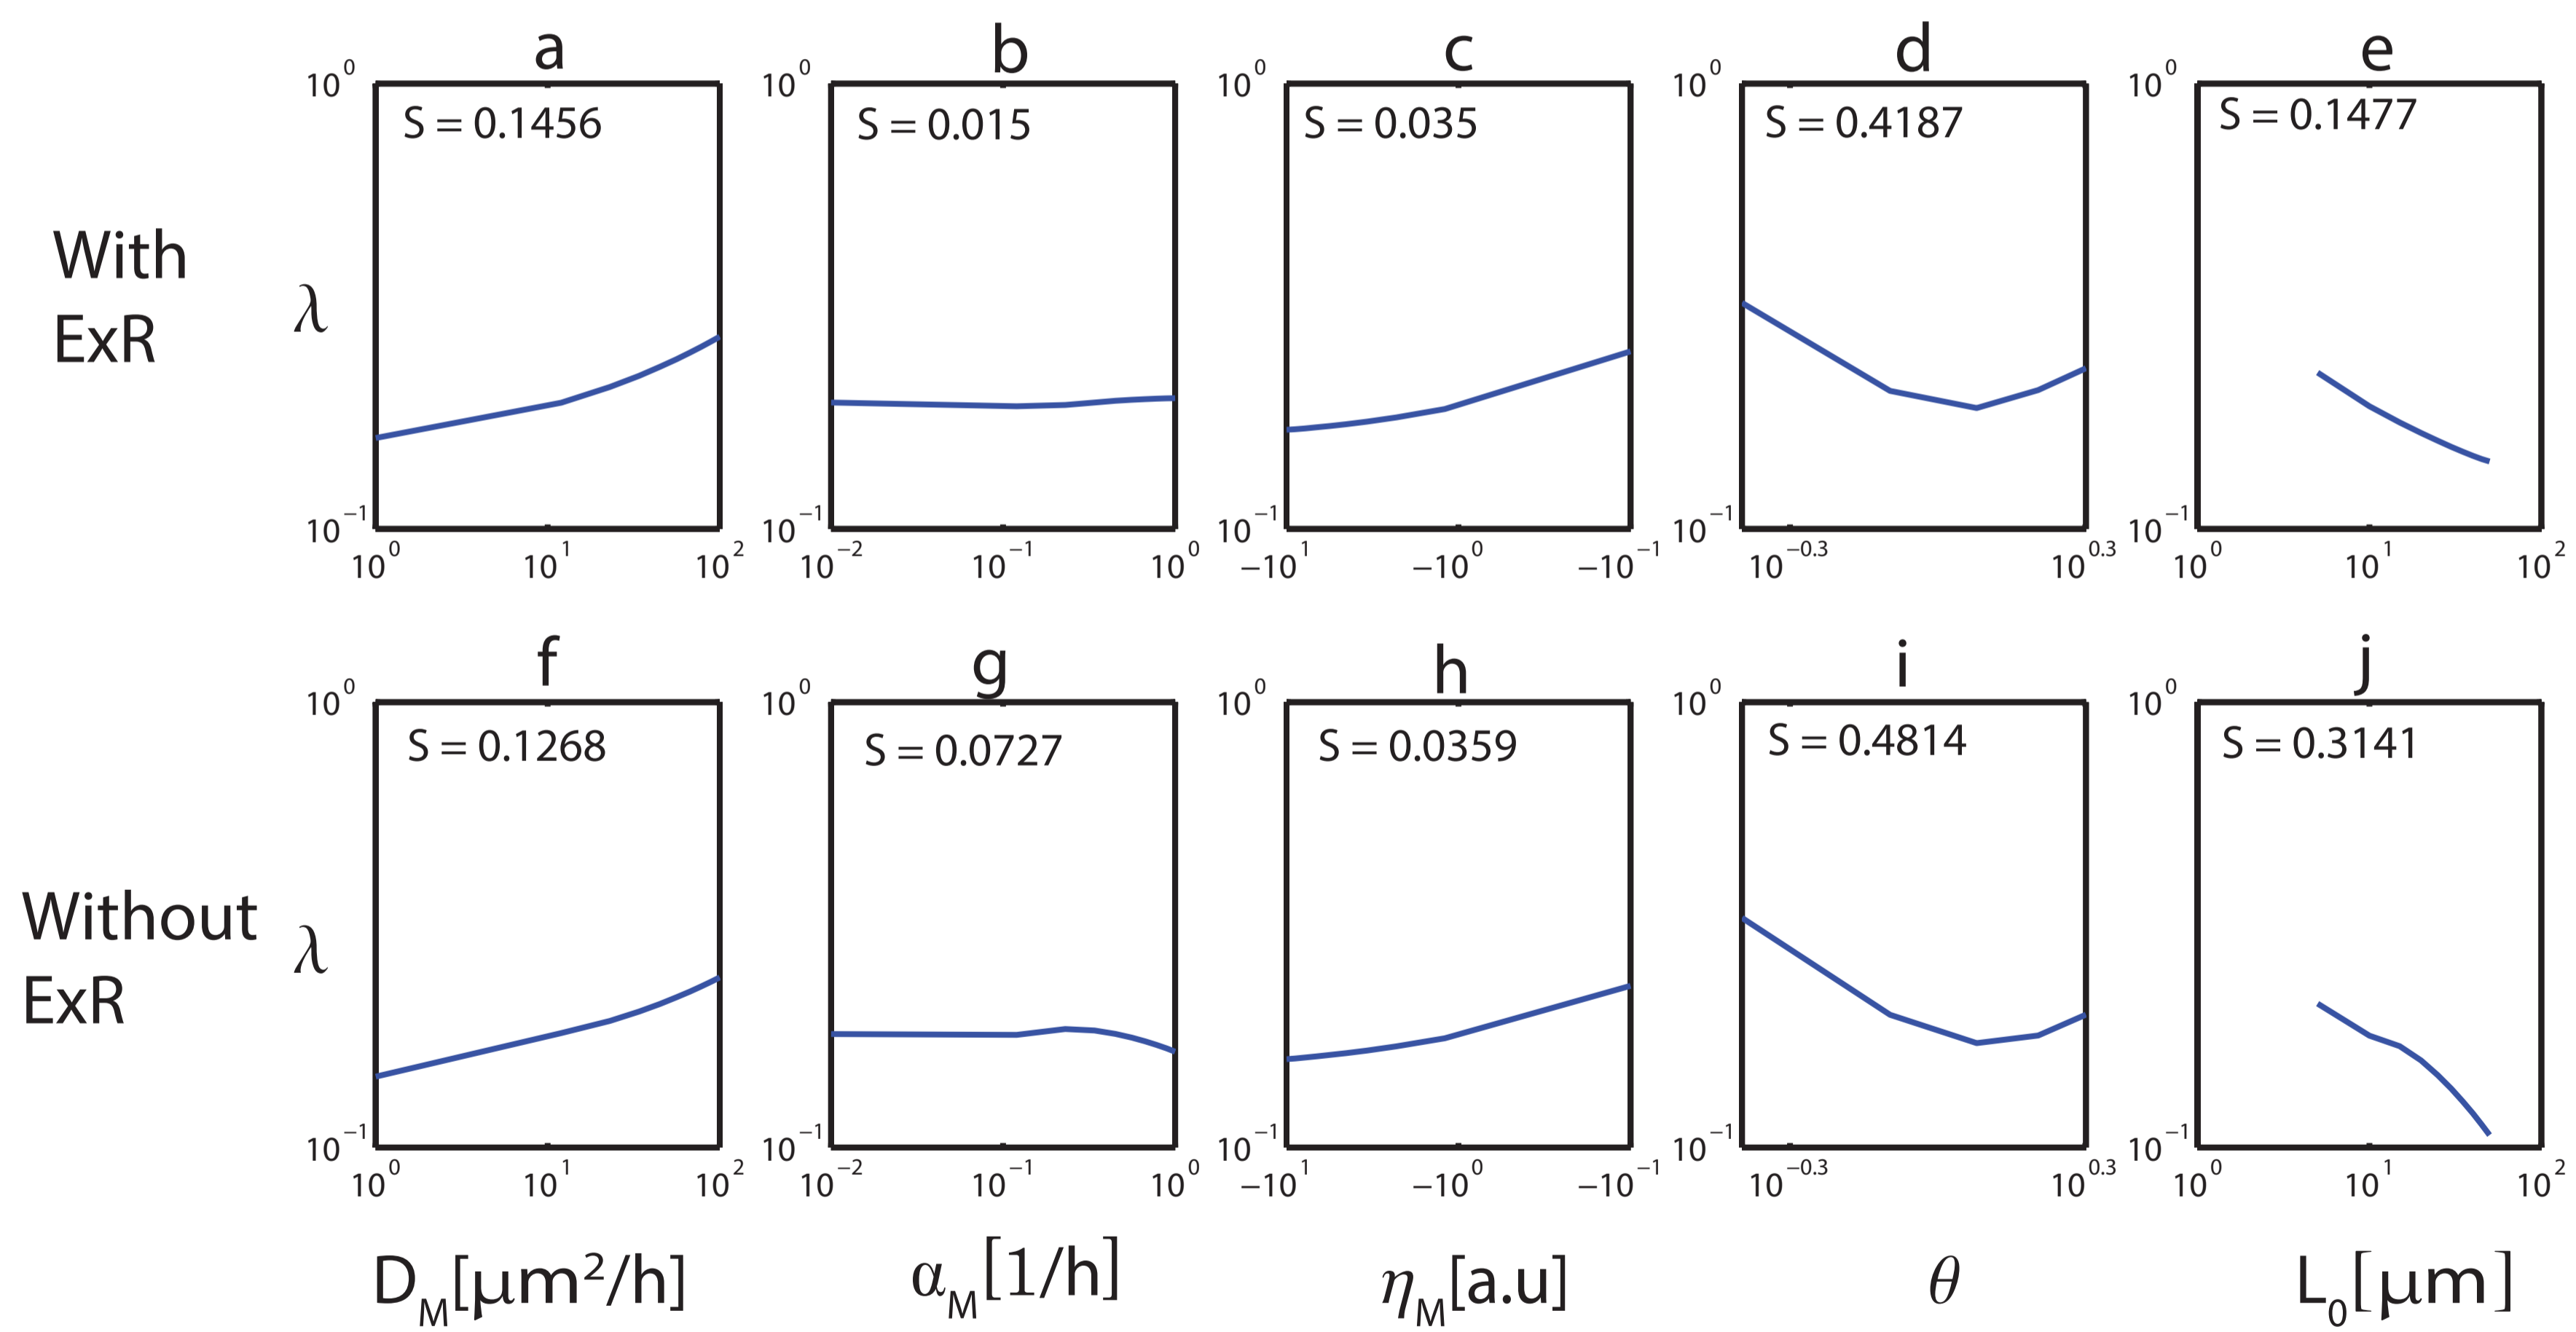

# Fig. S6

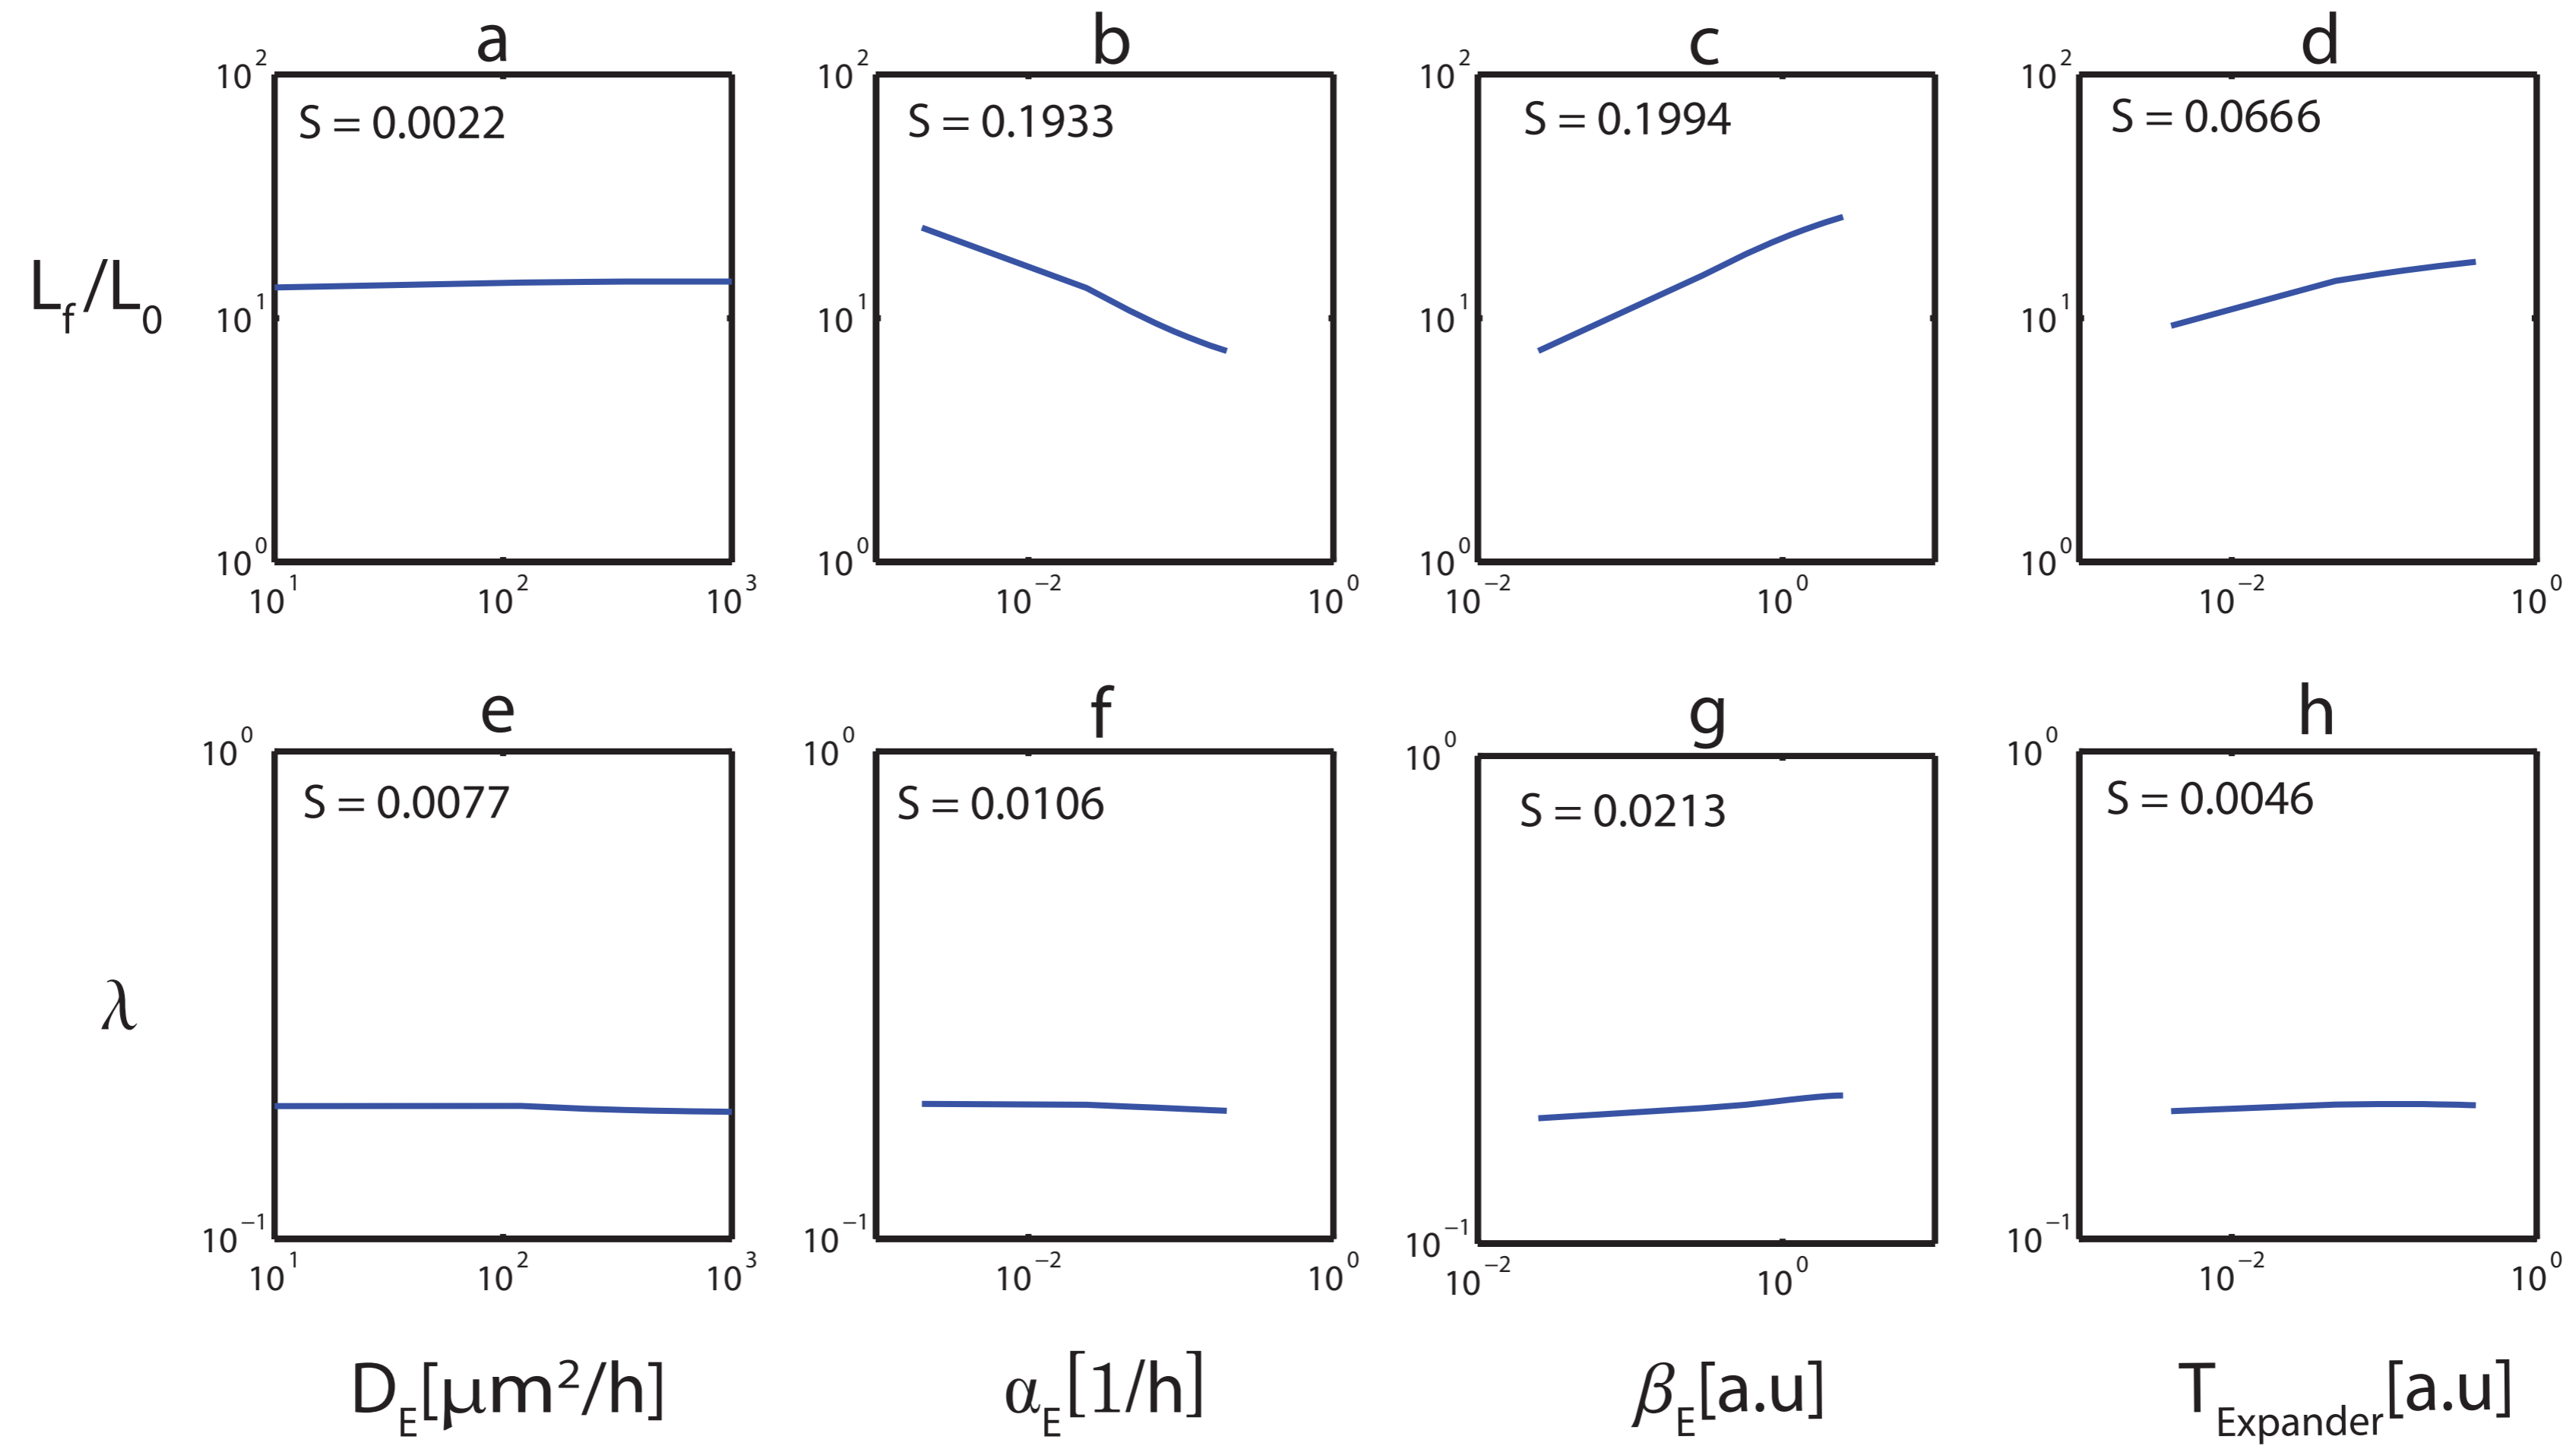

Fig. S7

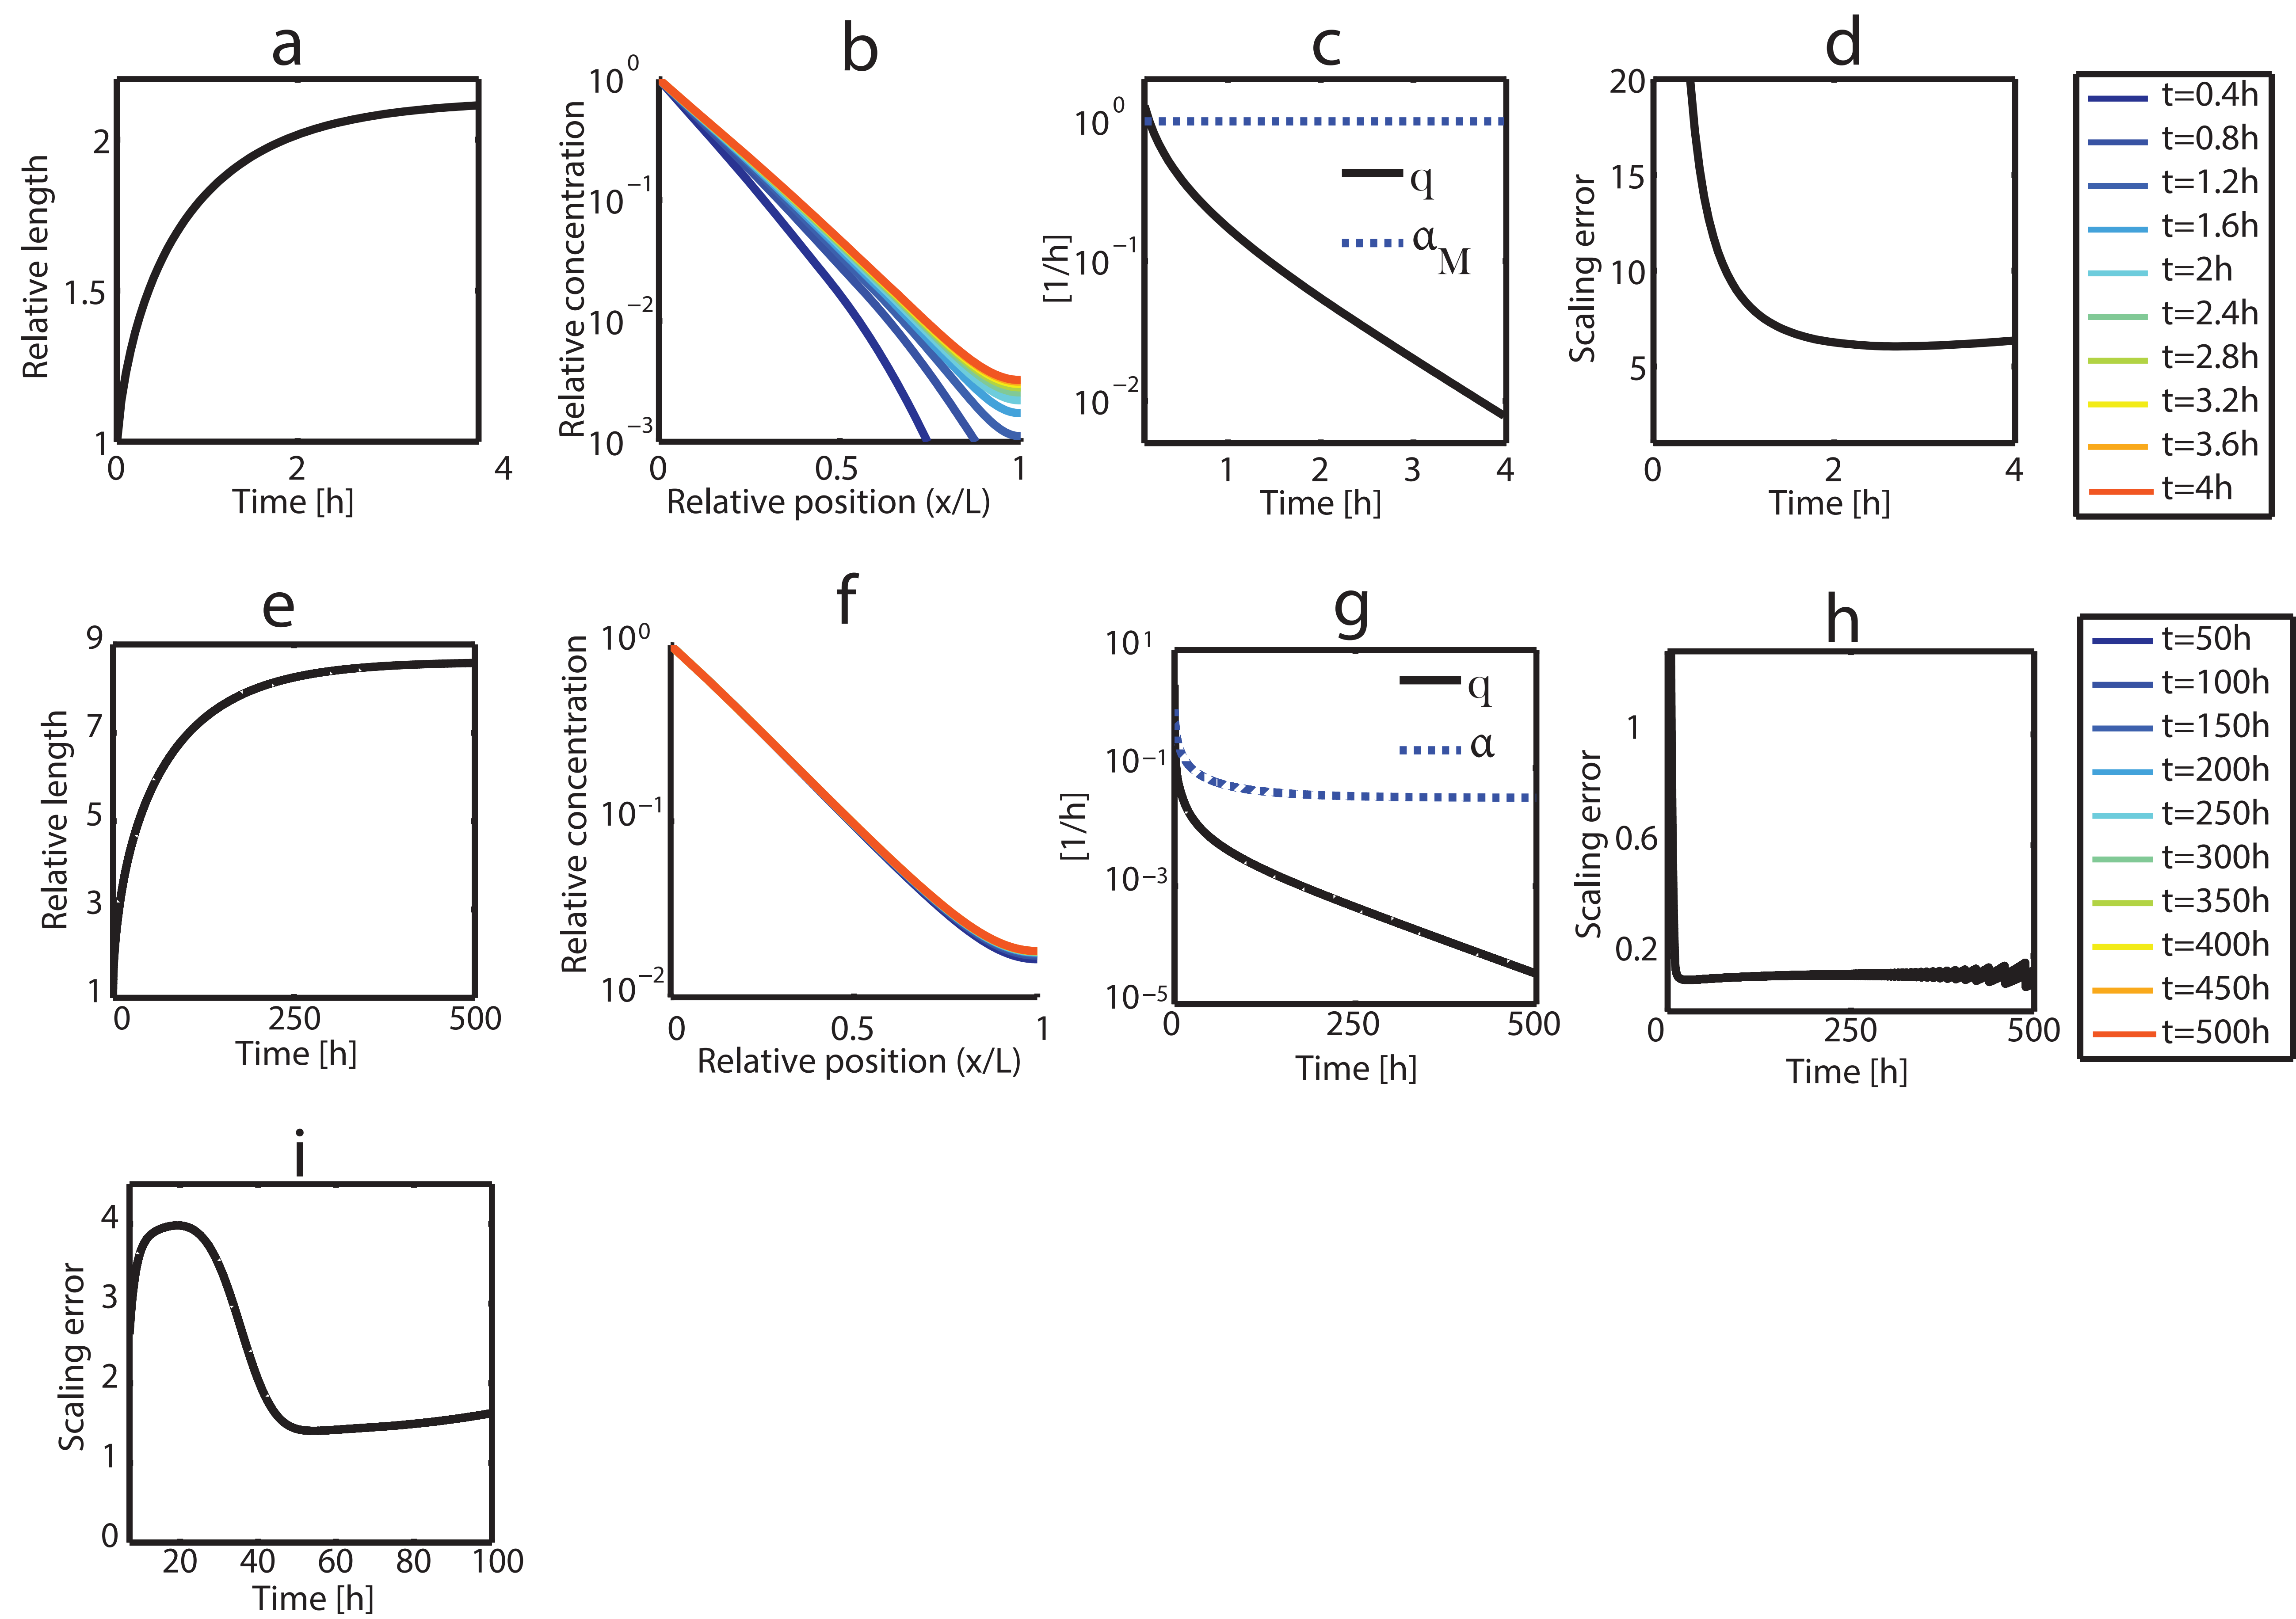

Fig. S8

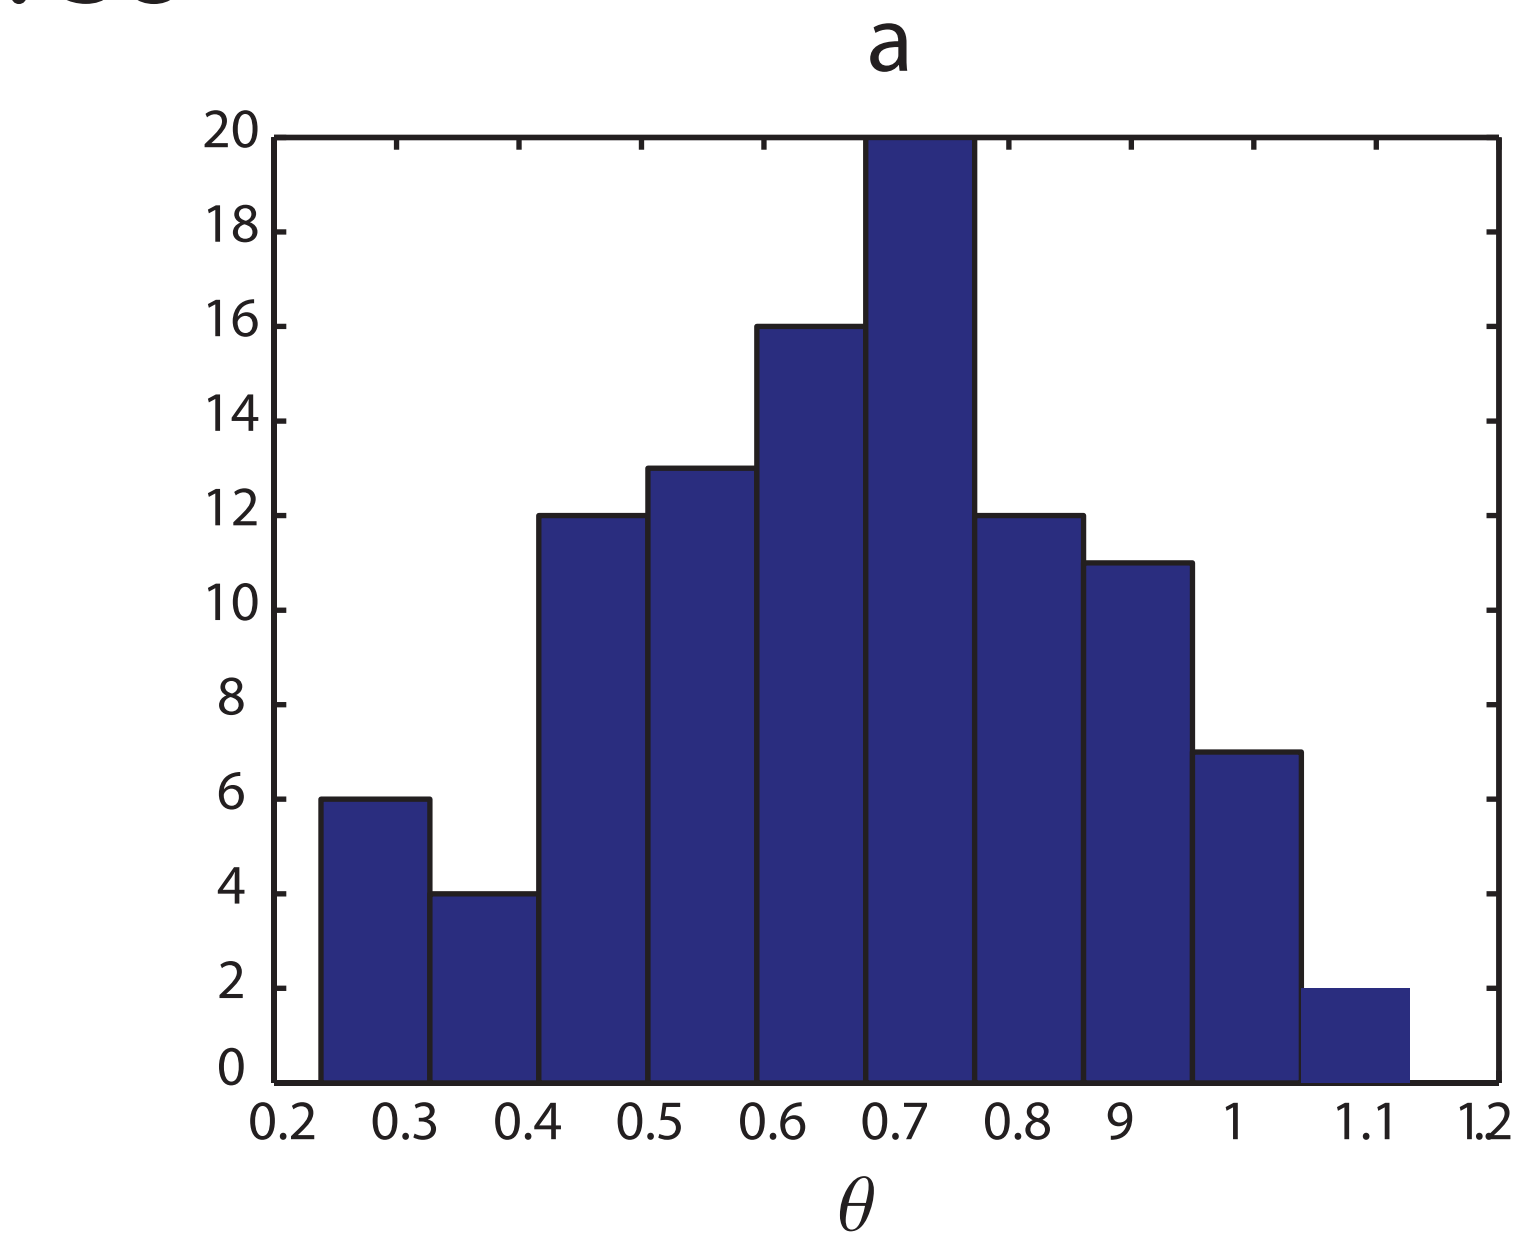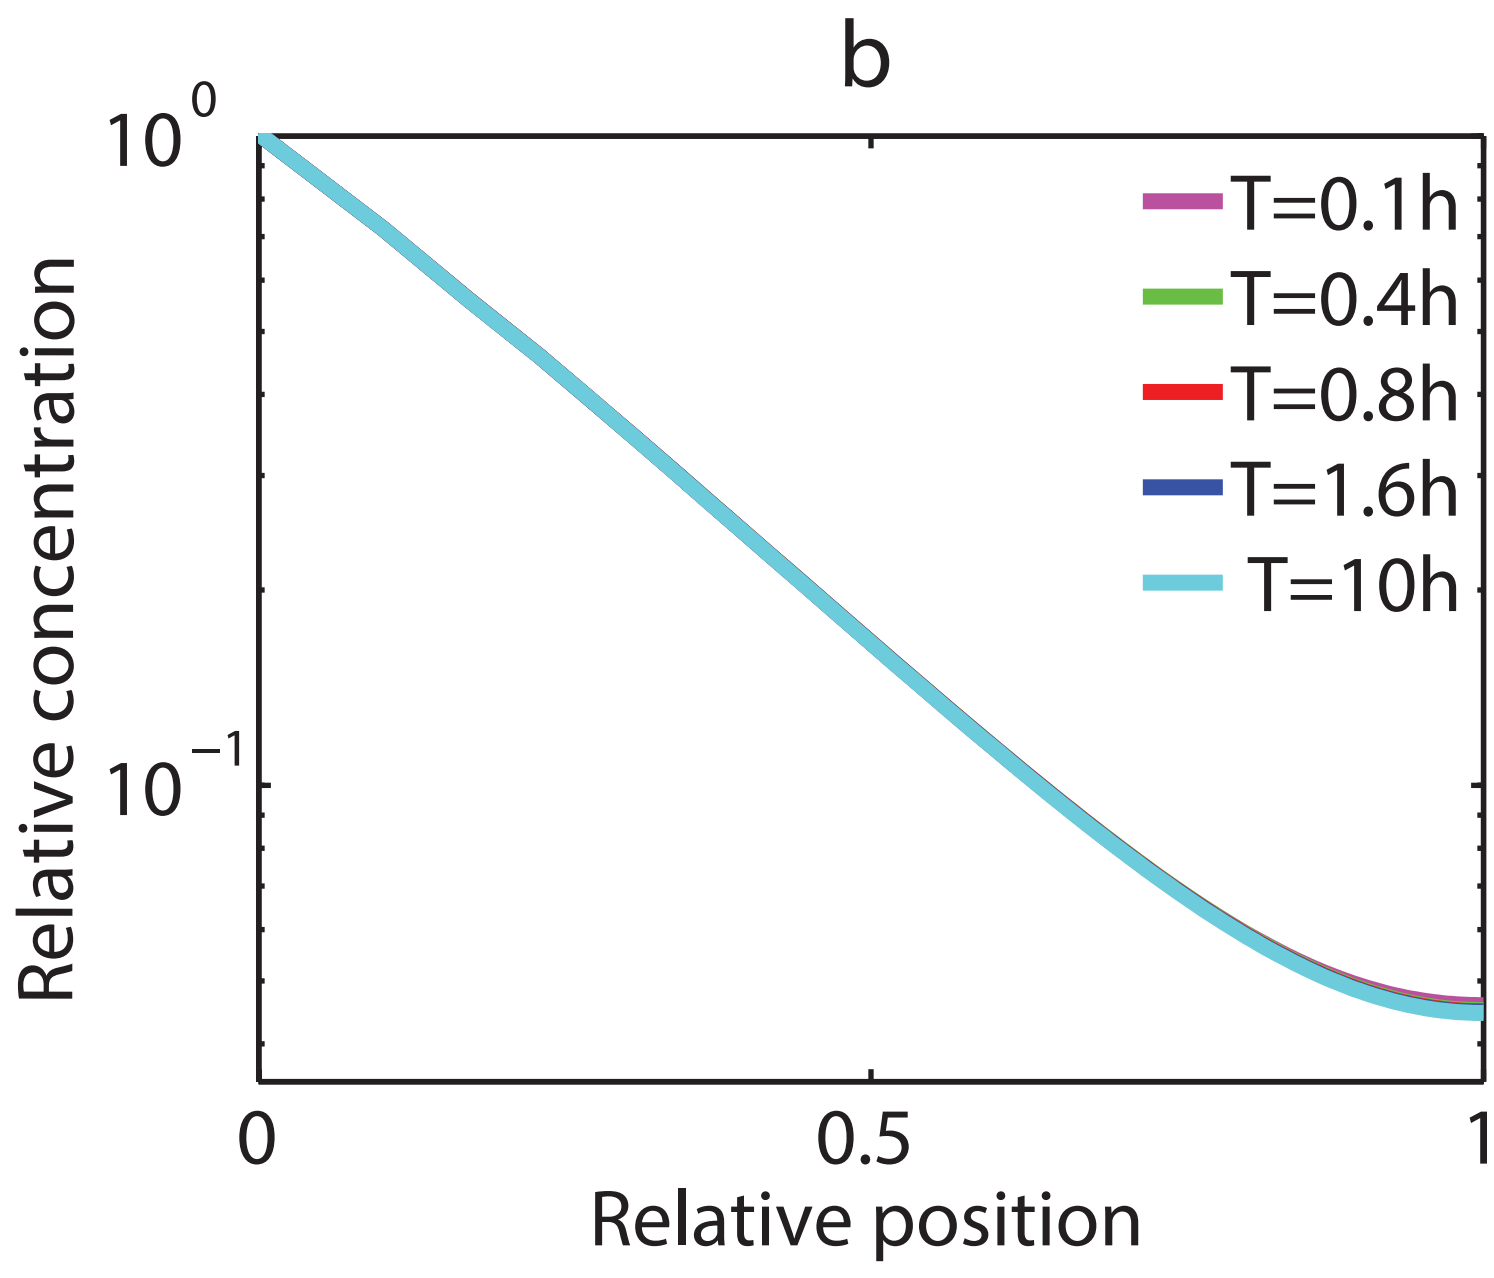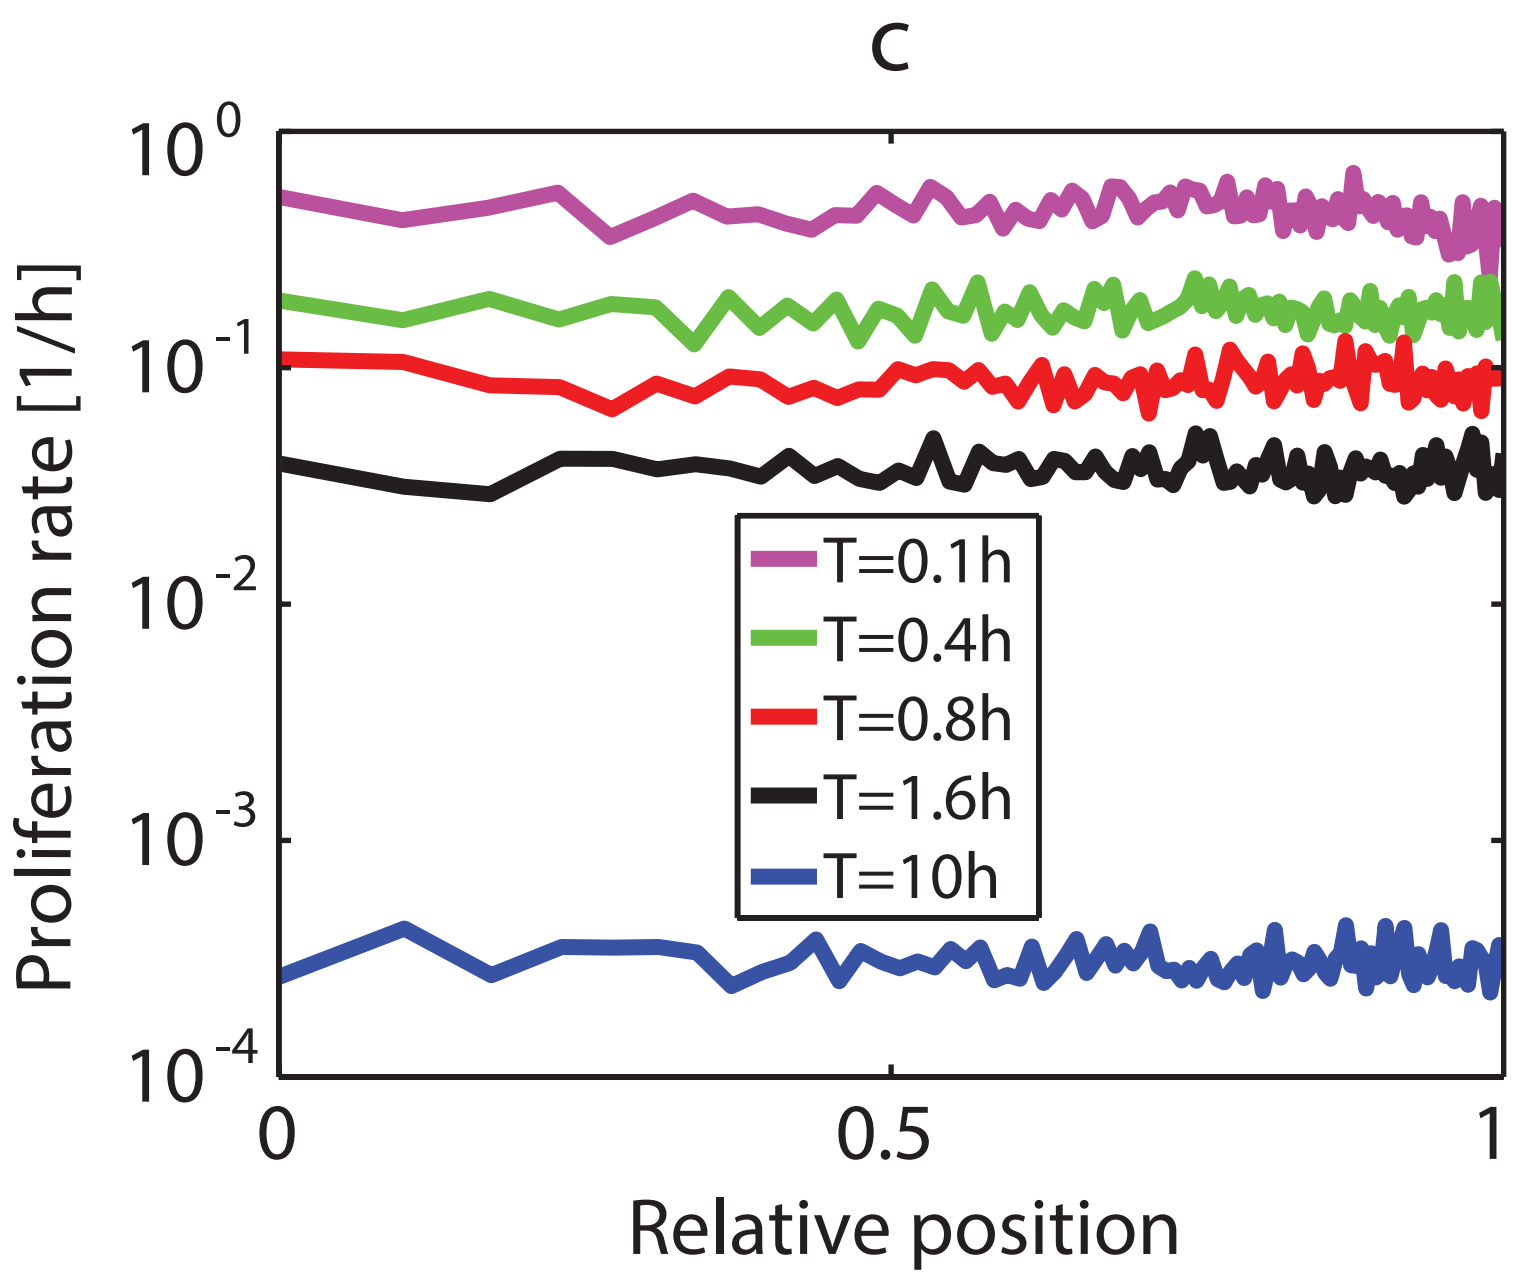

# Fig. S9

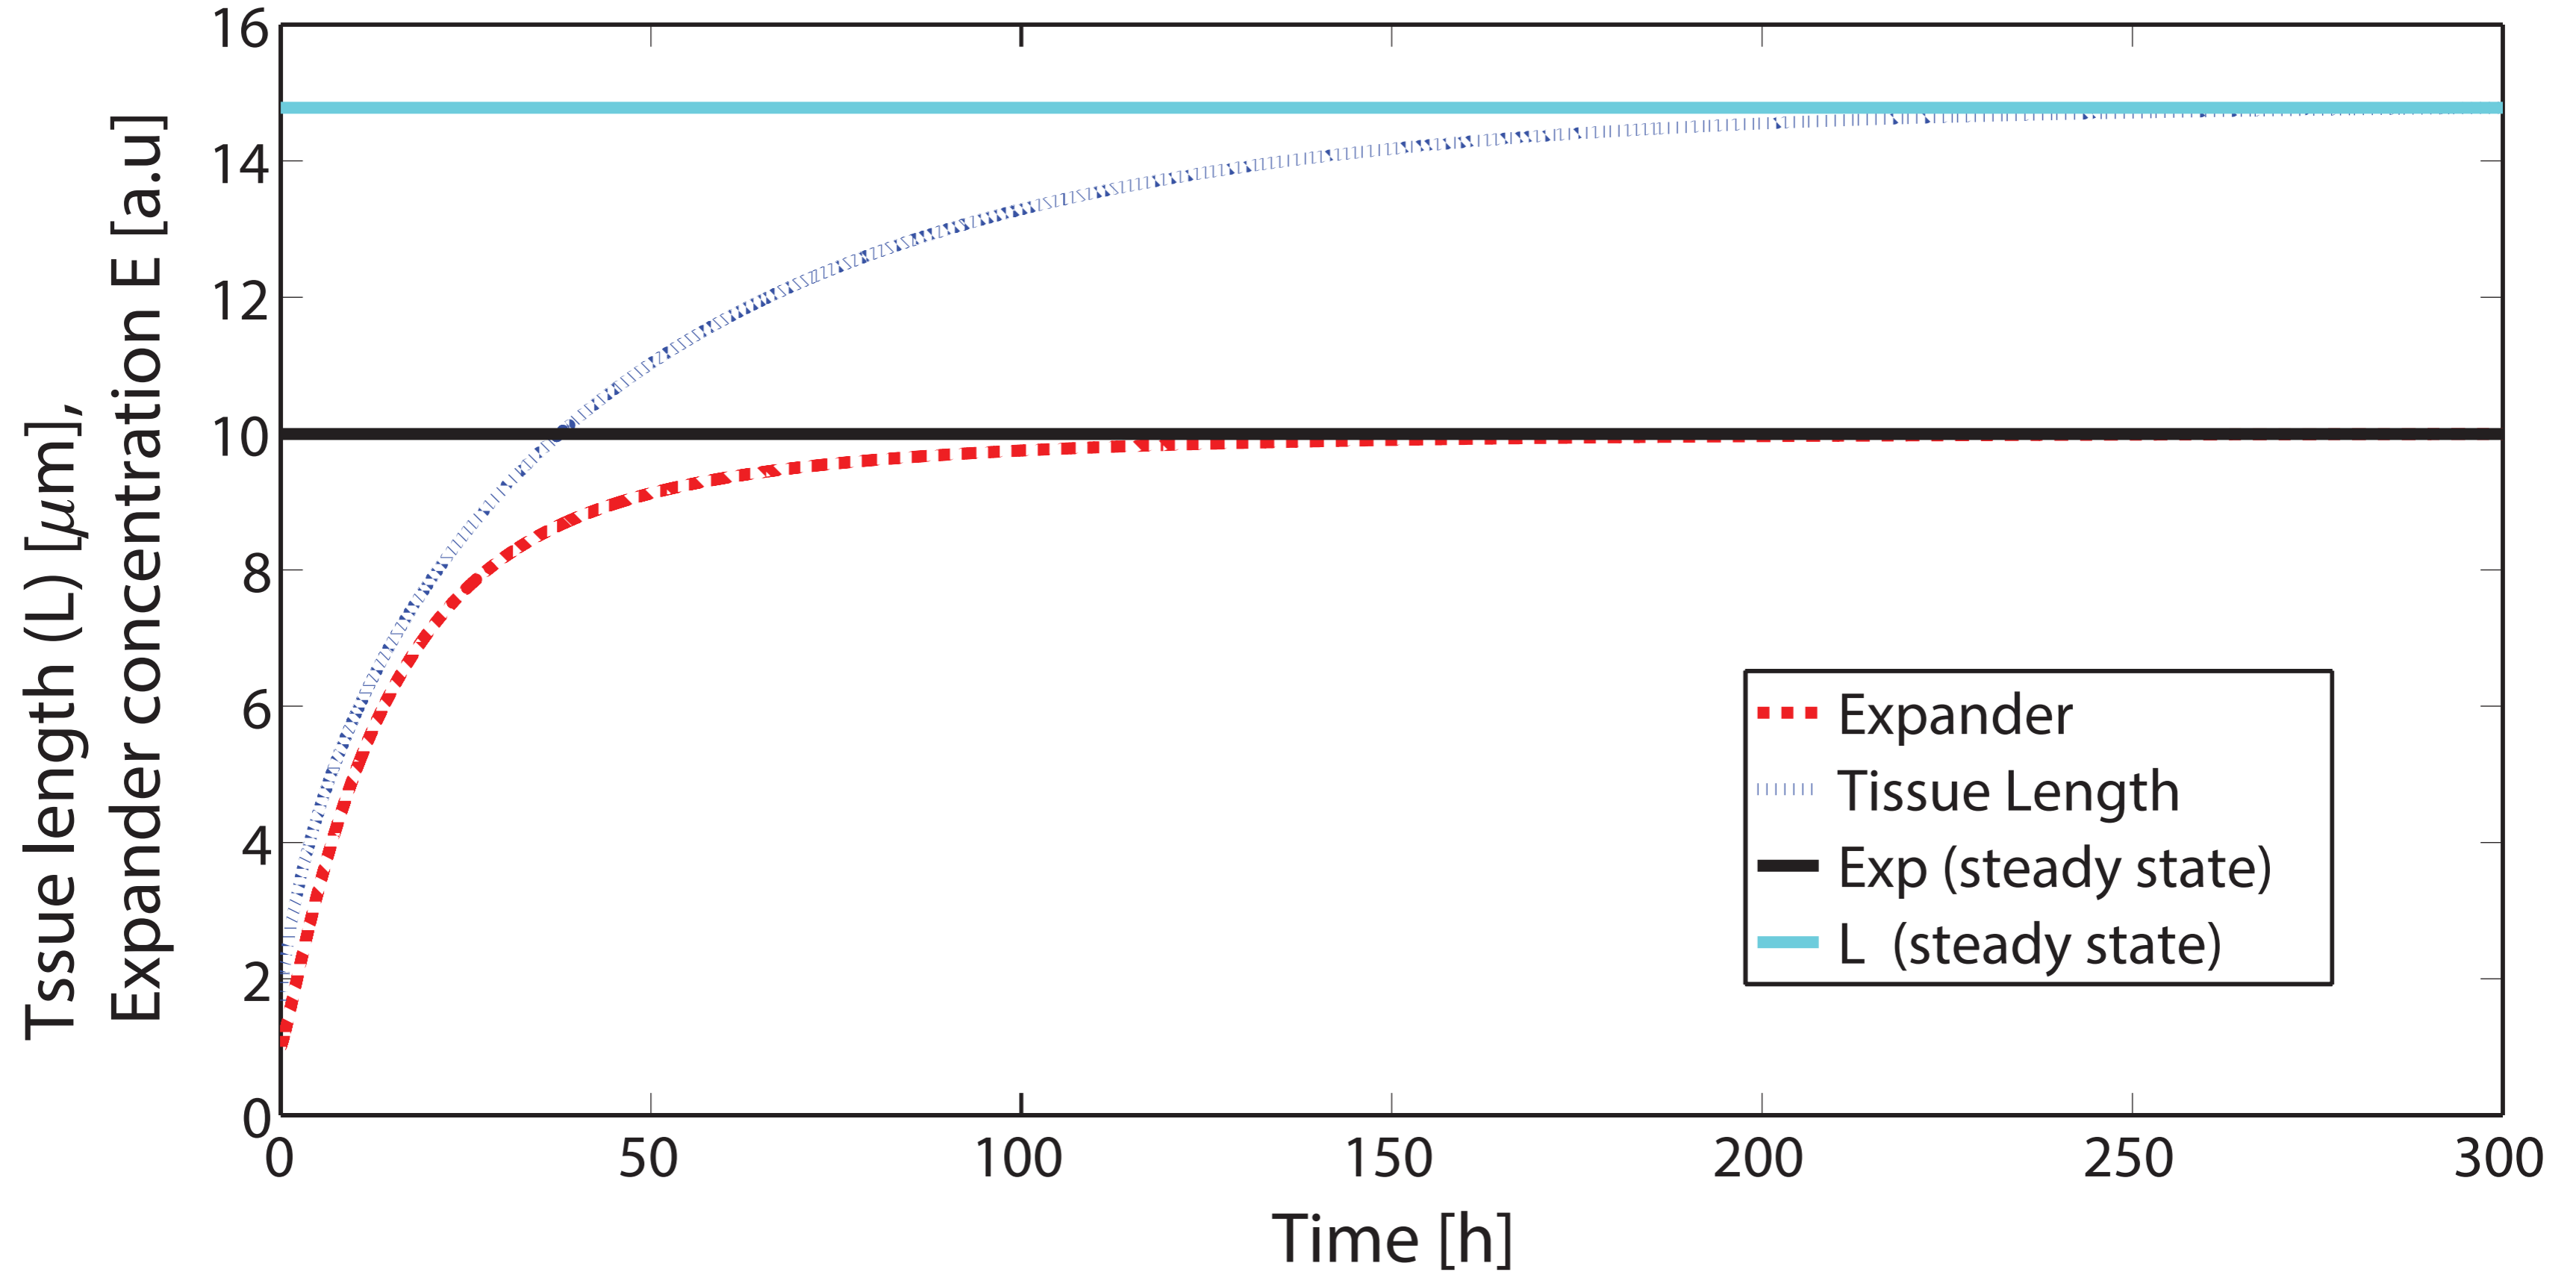

Fig. S10

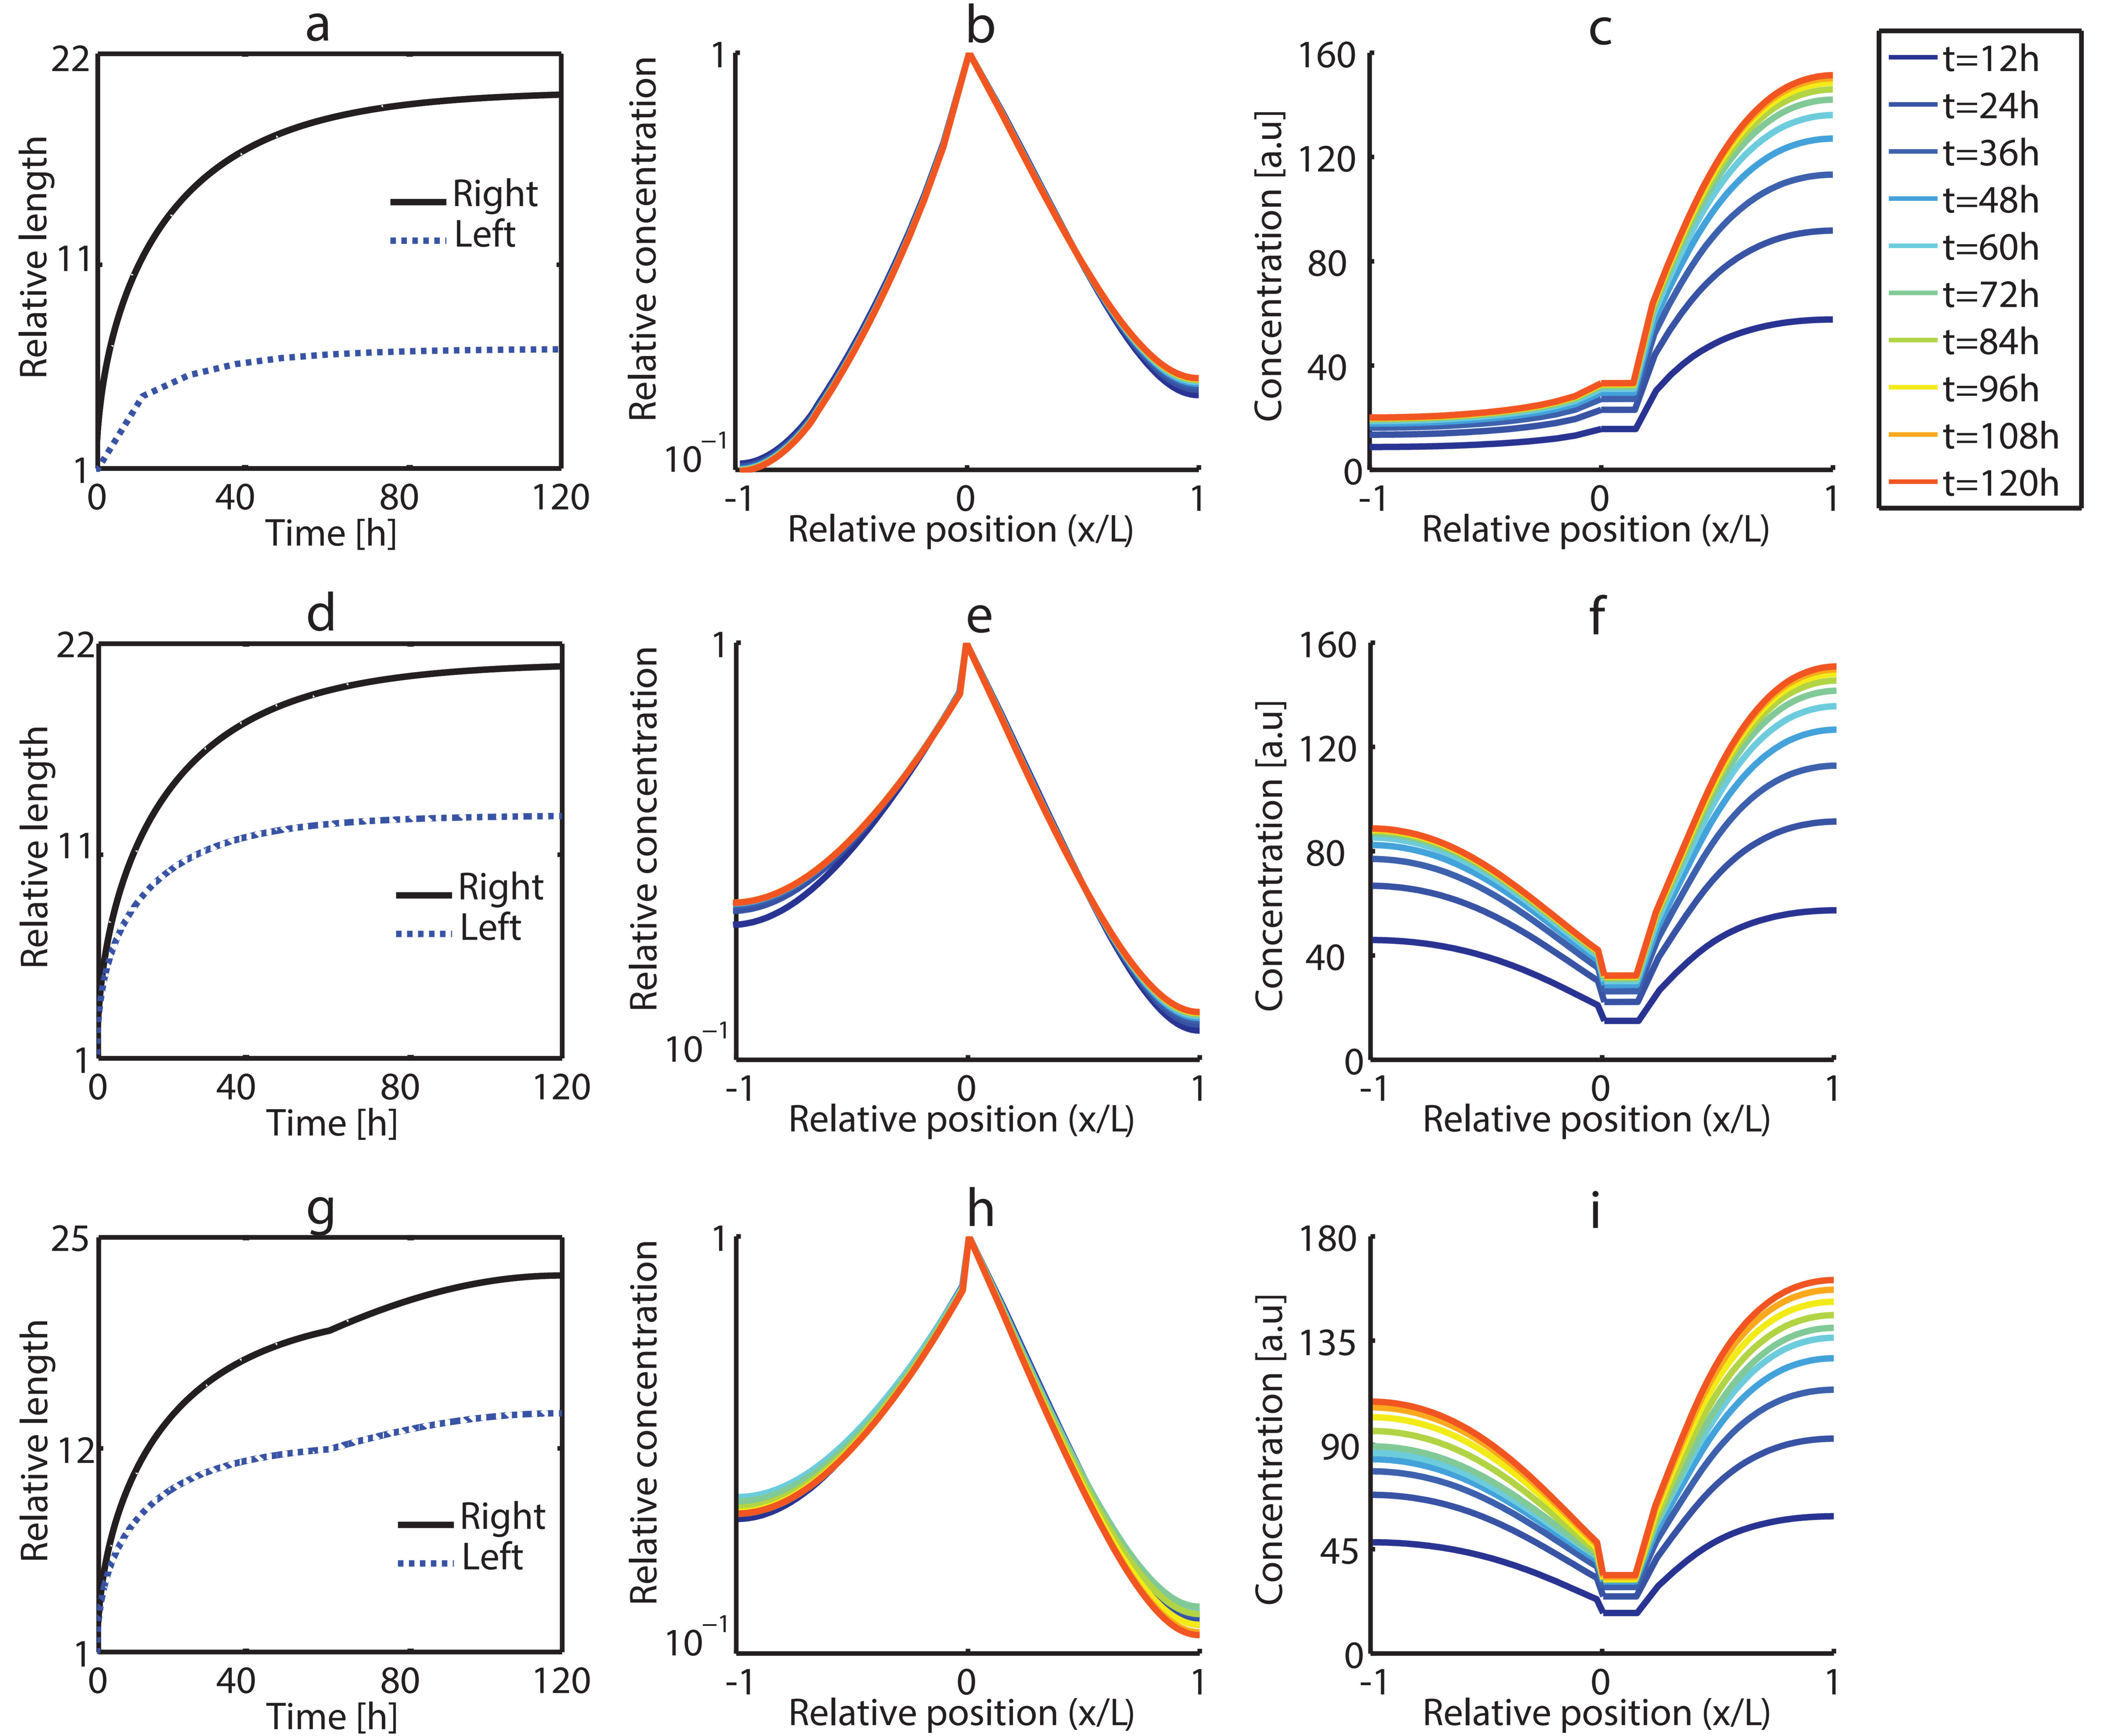

Fig. S11

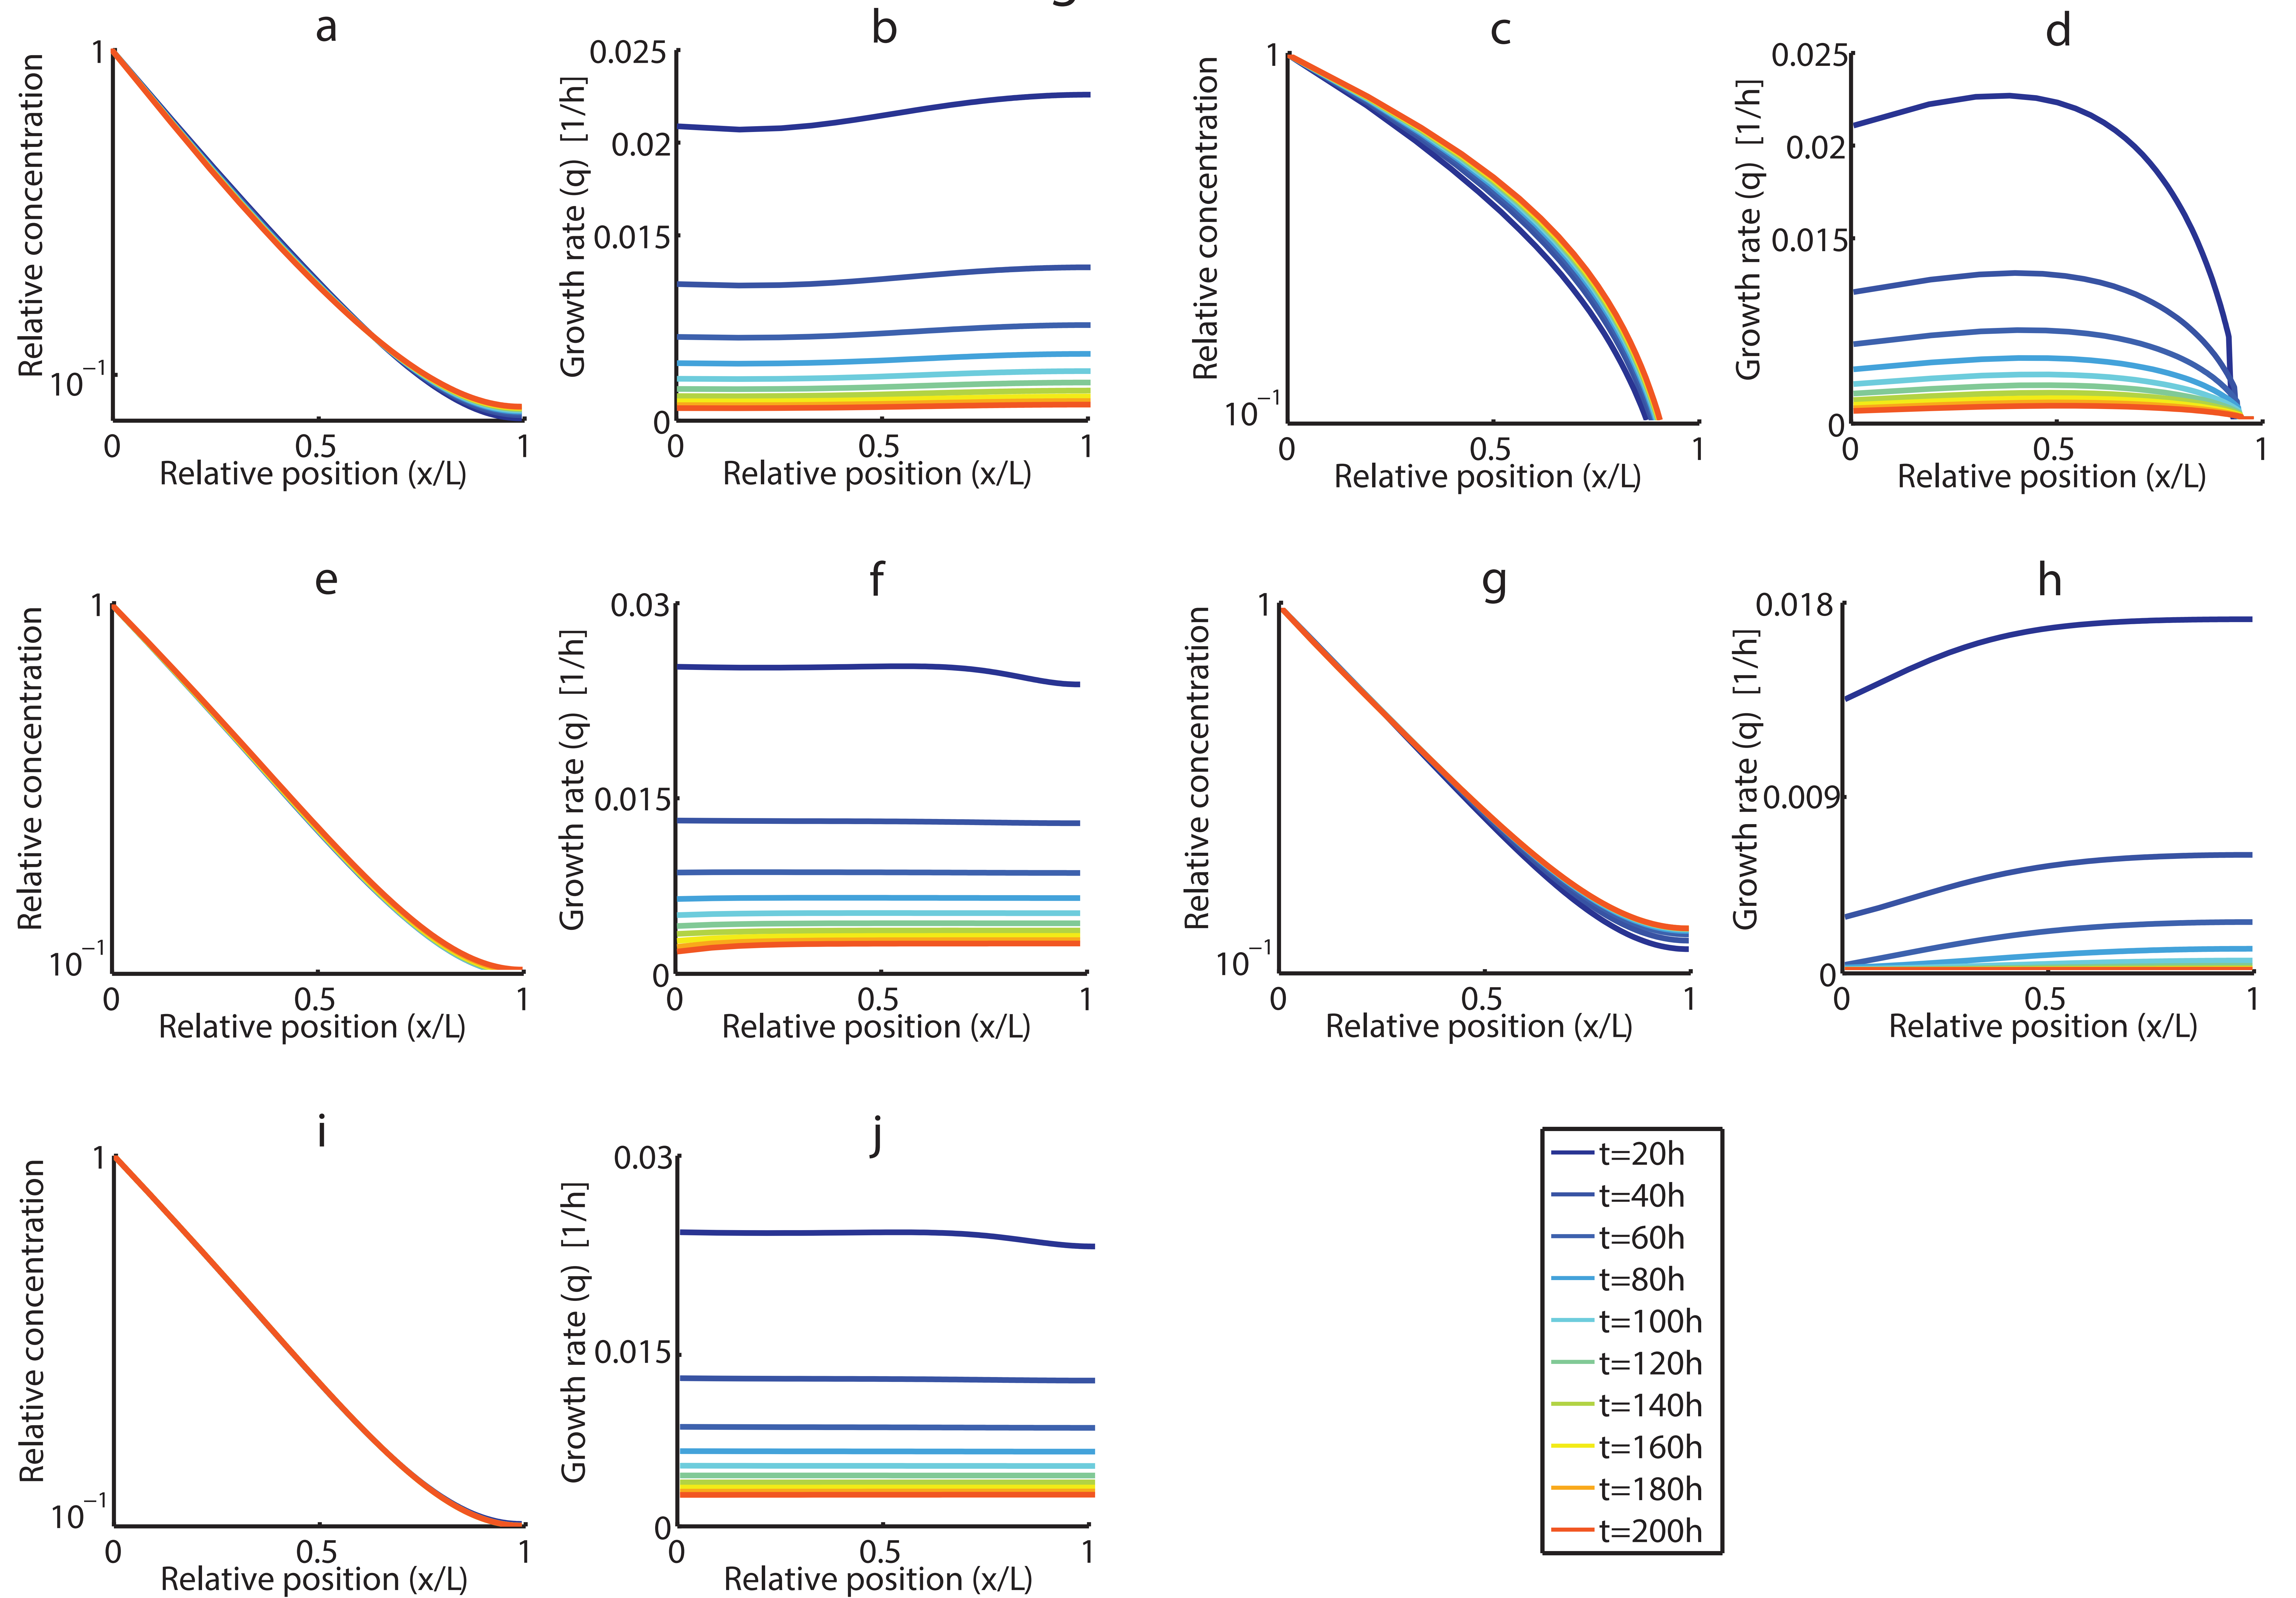

Fig. S12

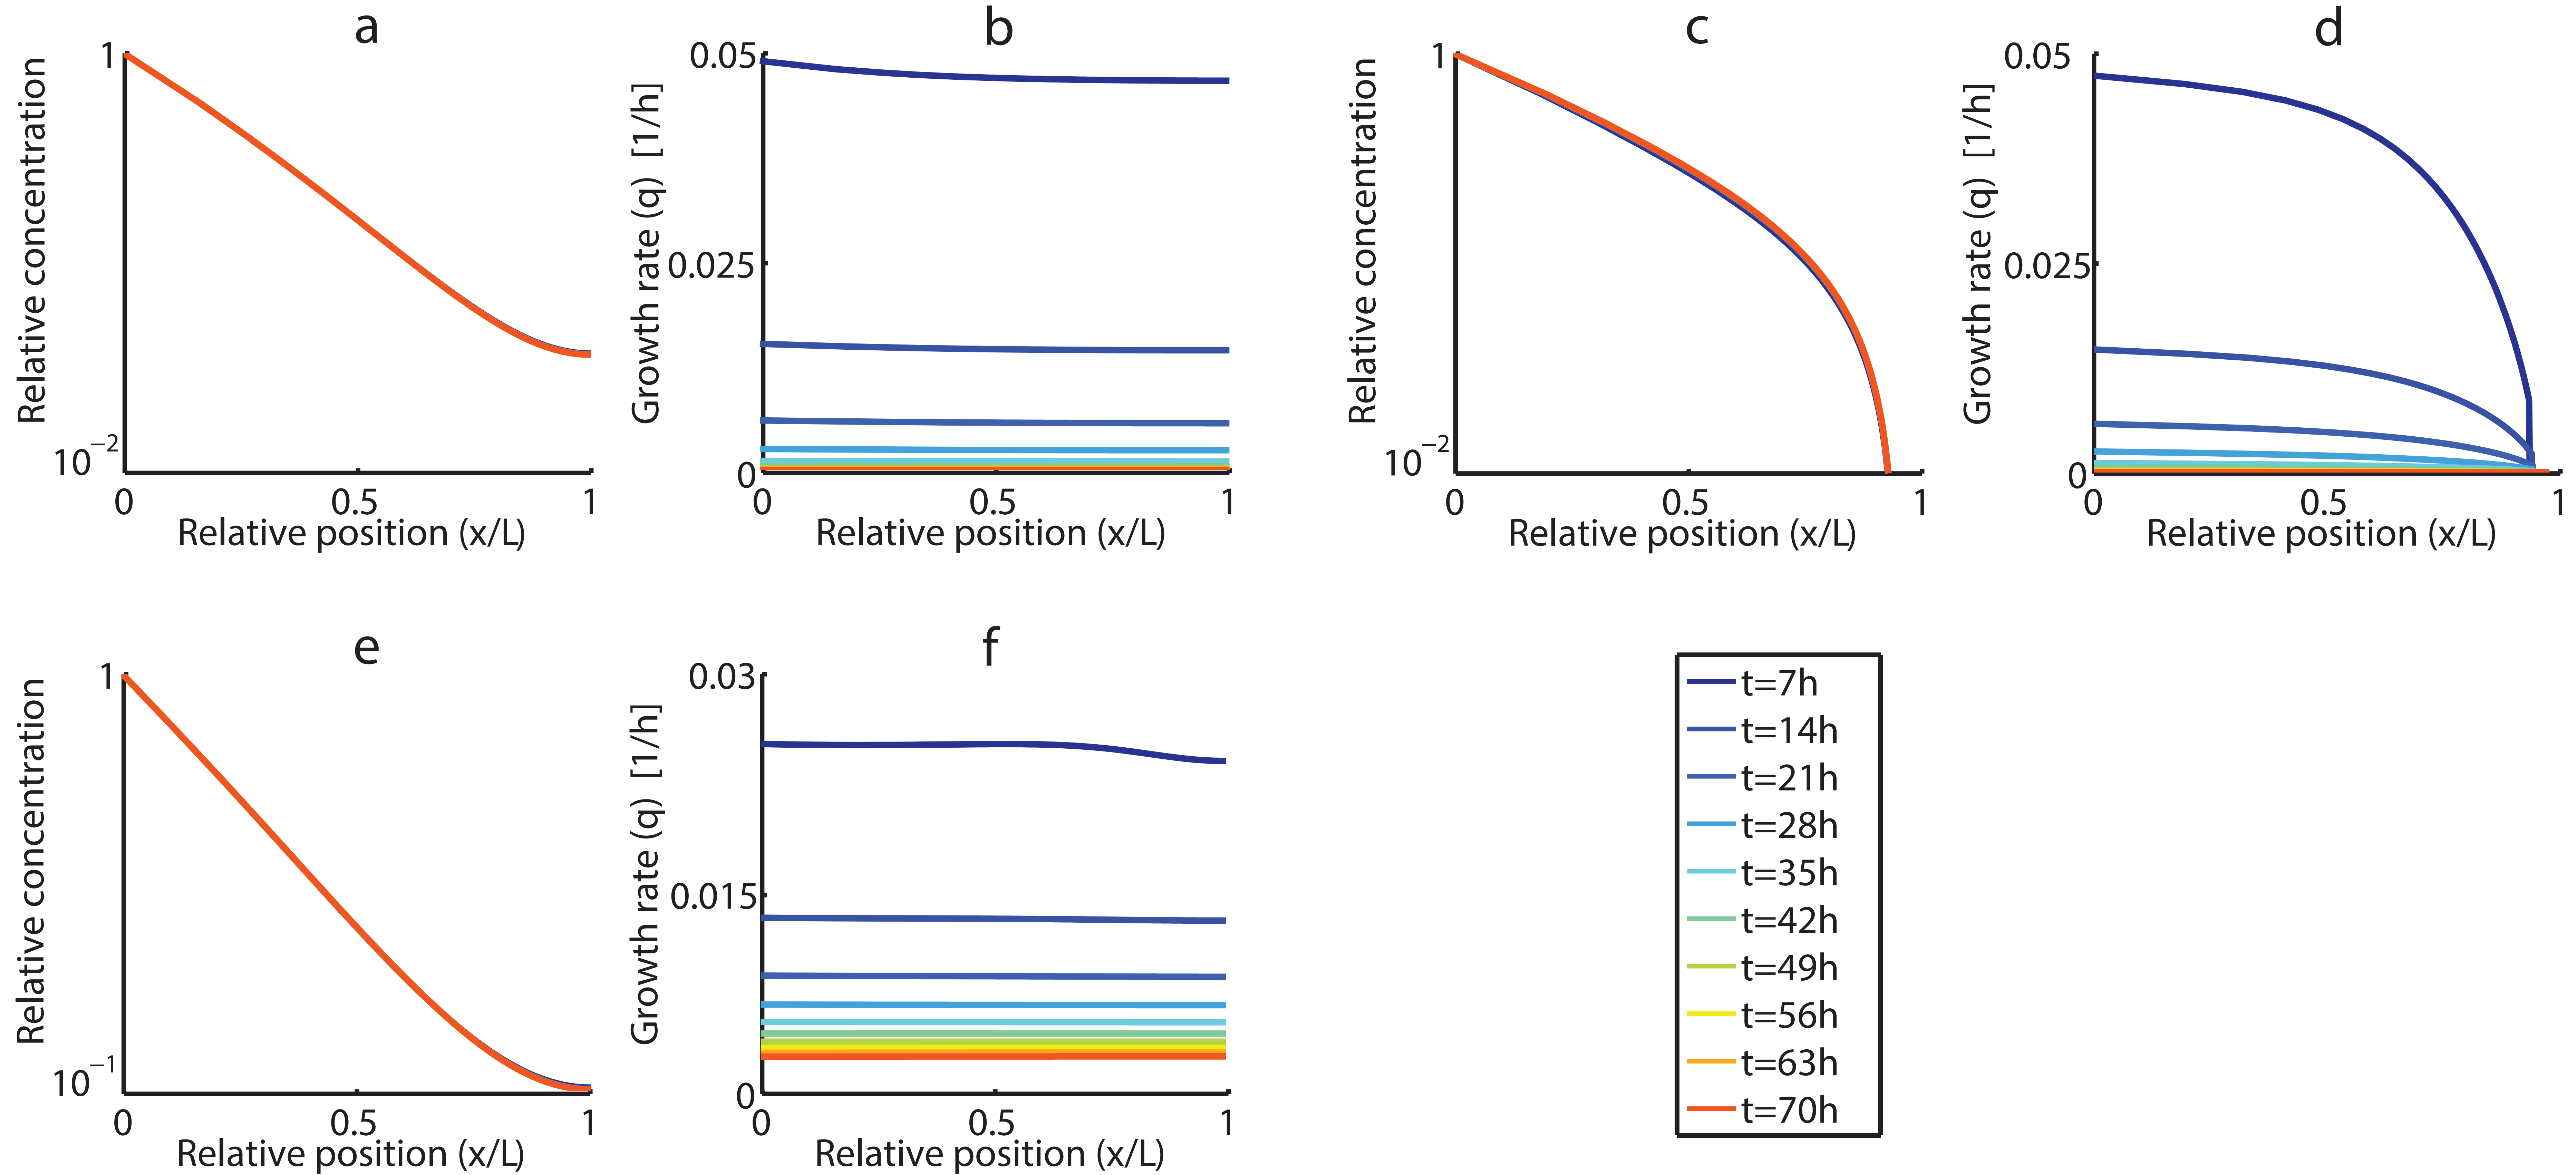

Fig S13

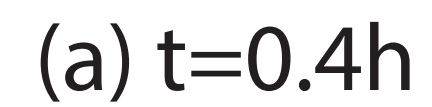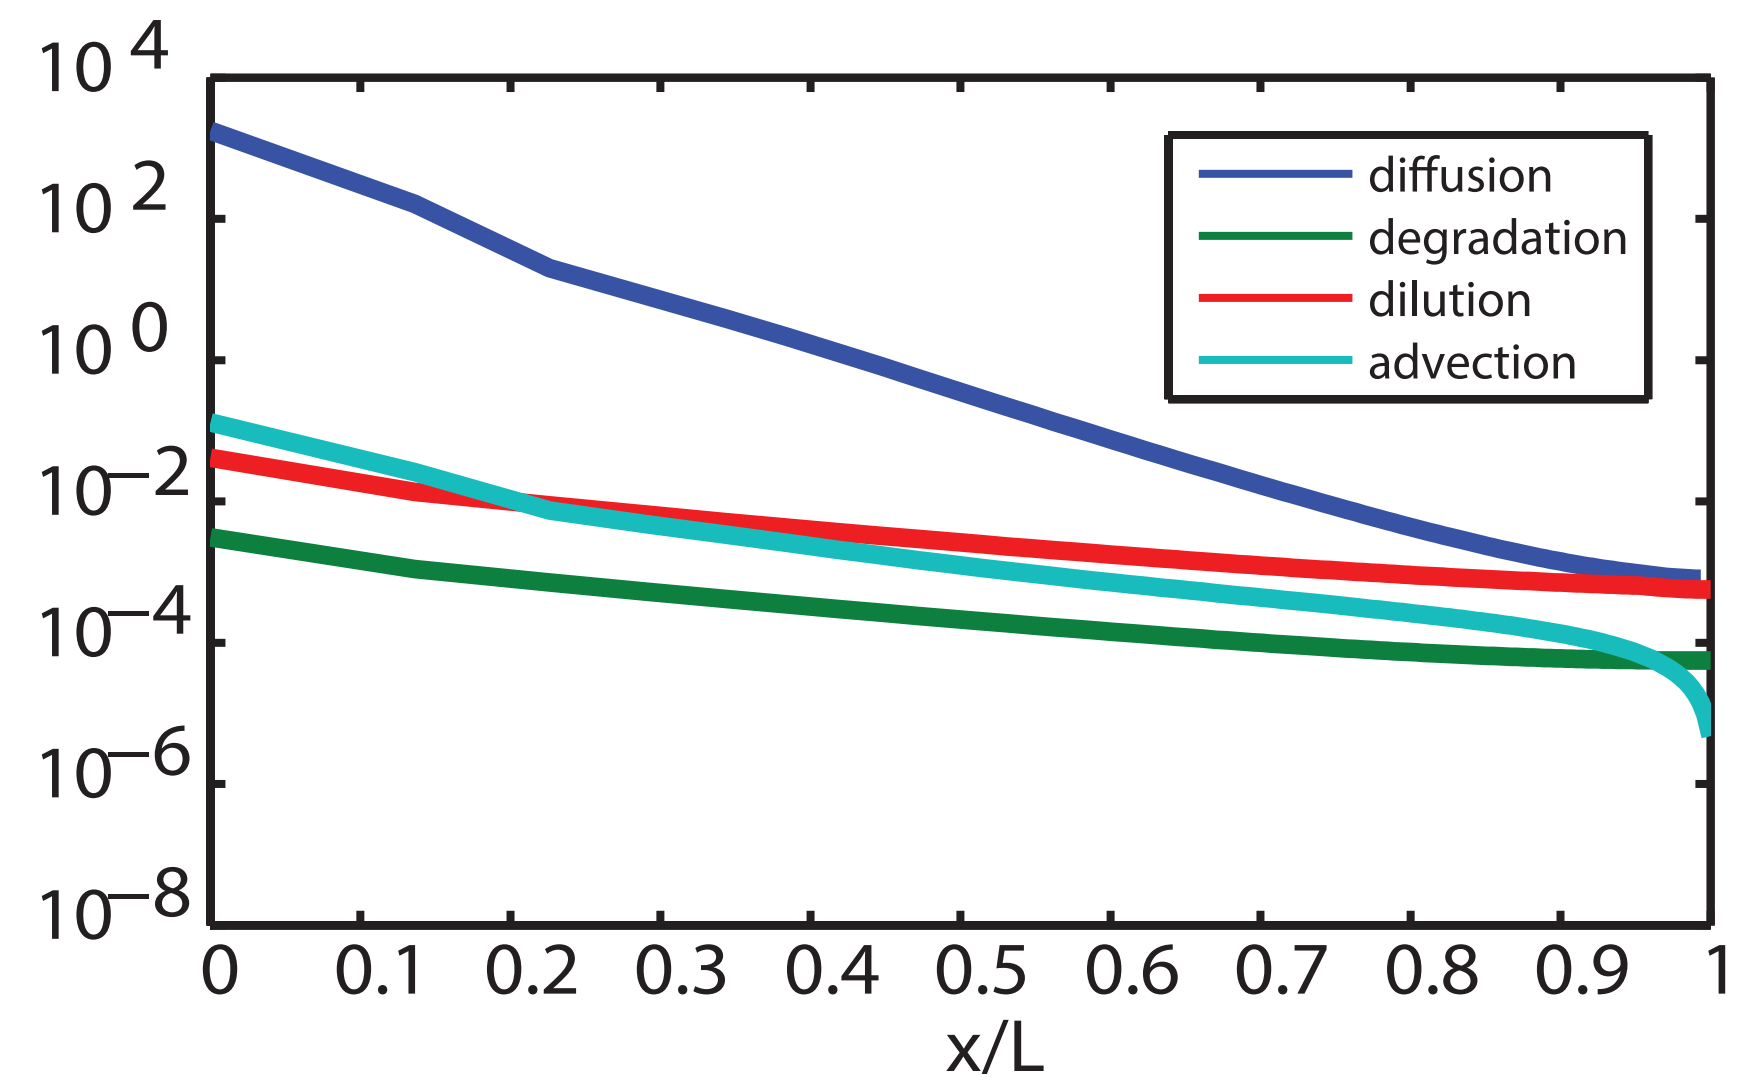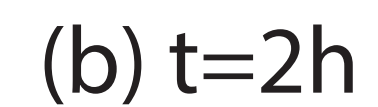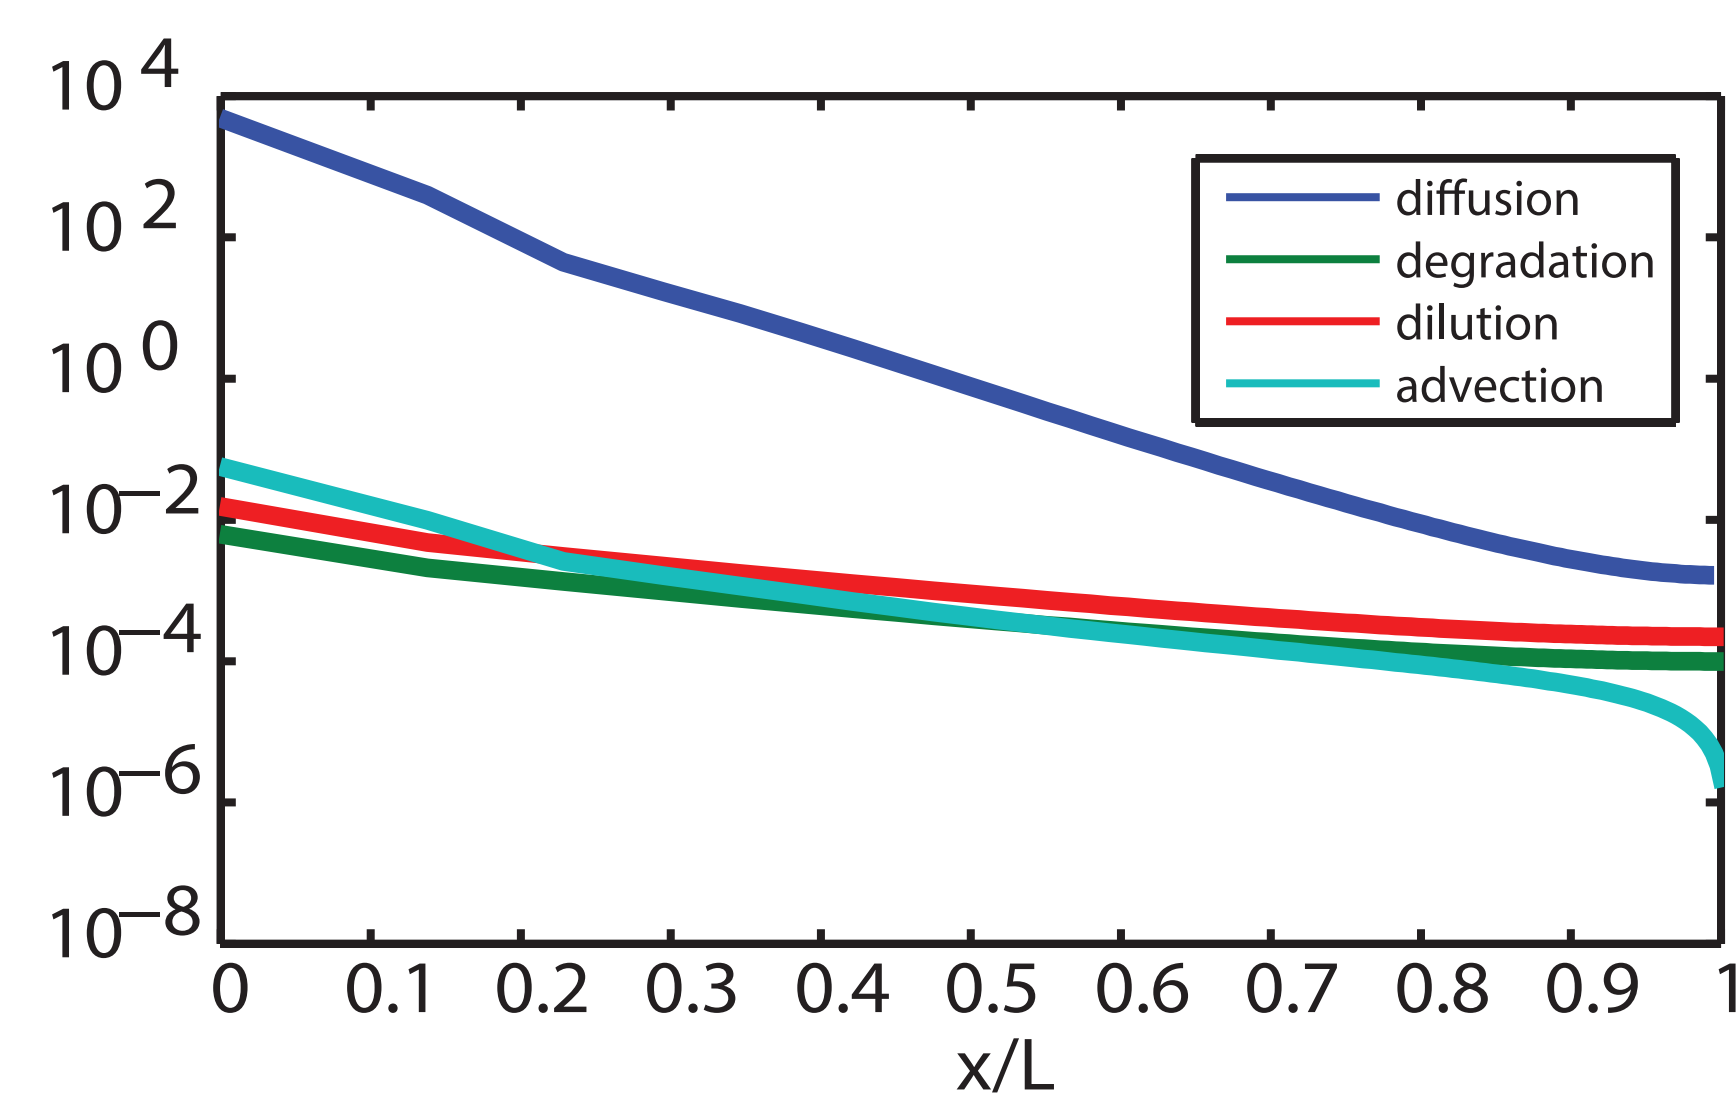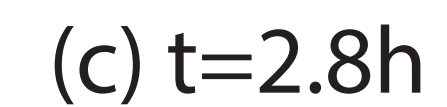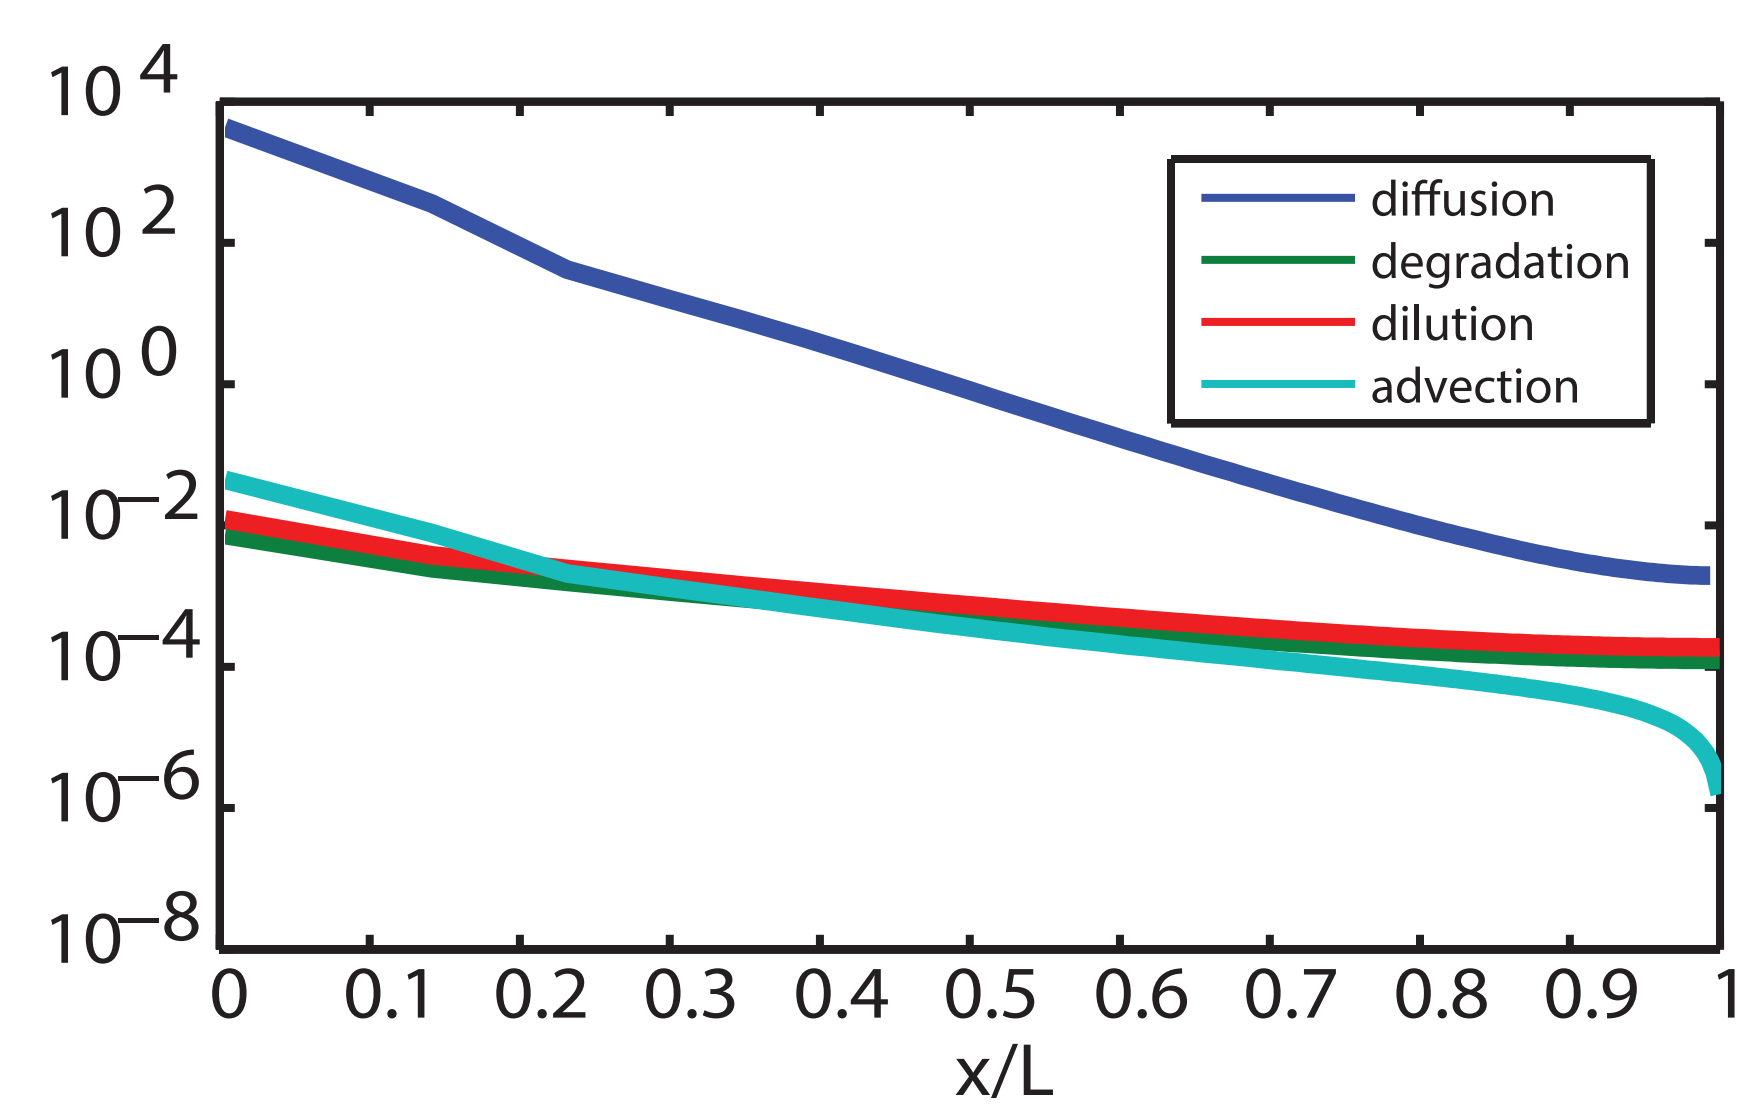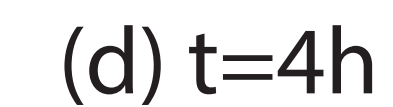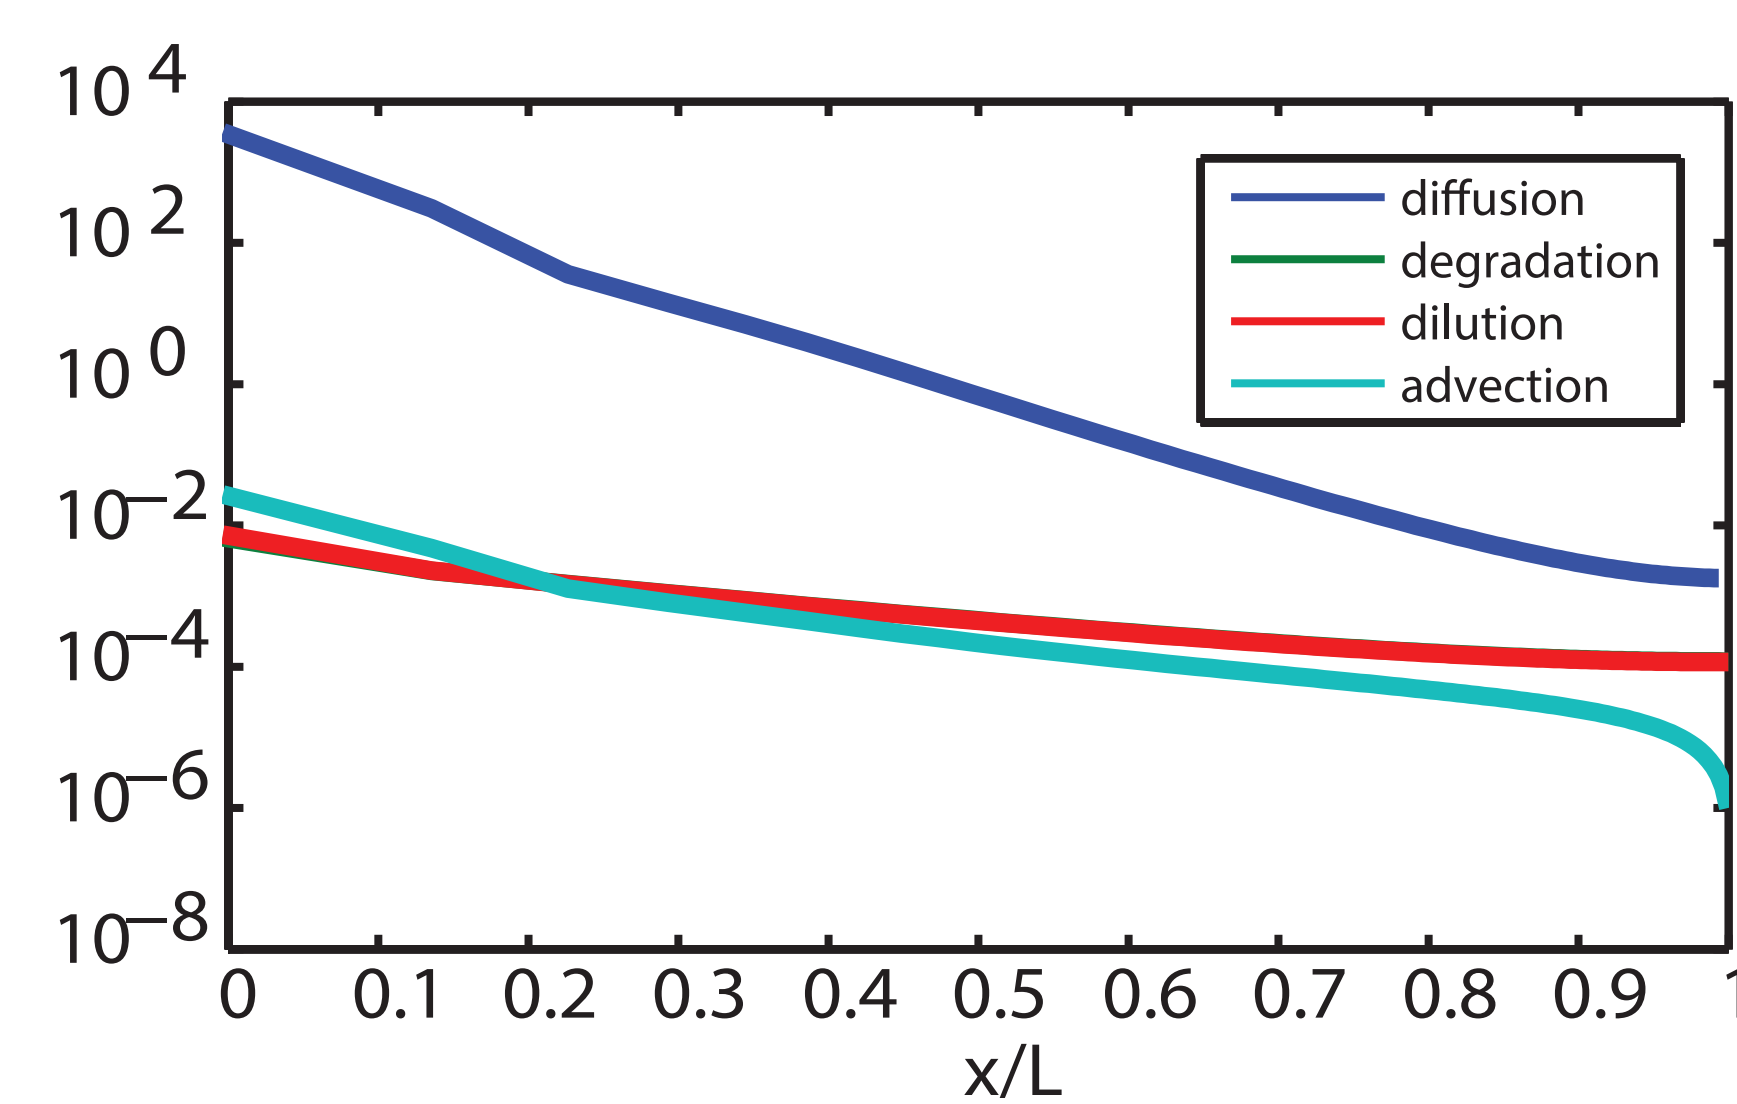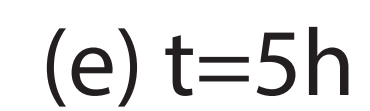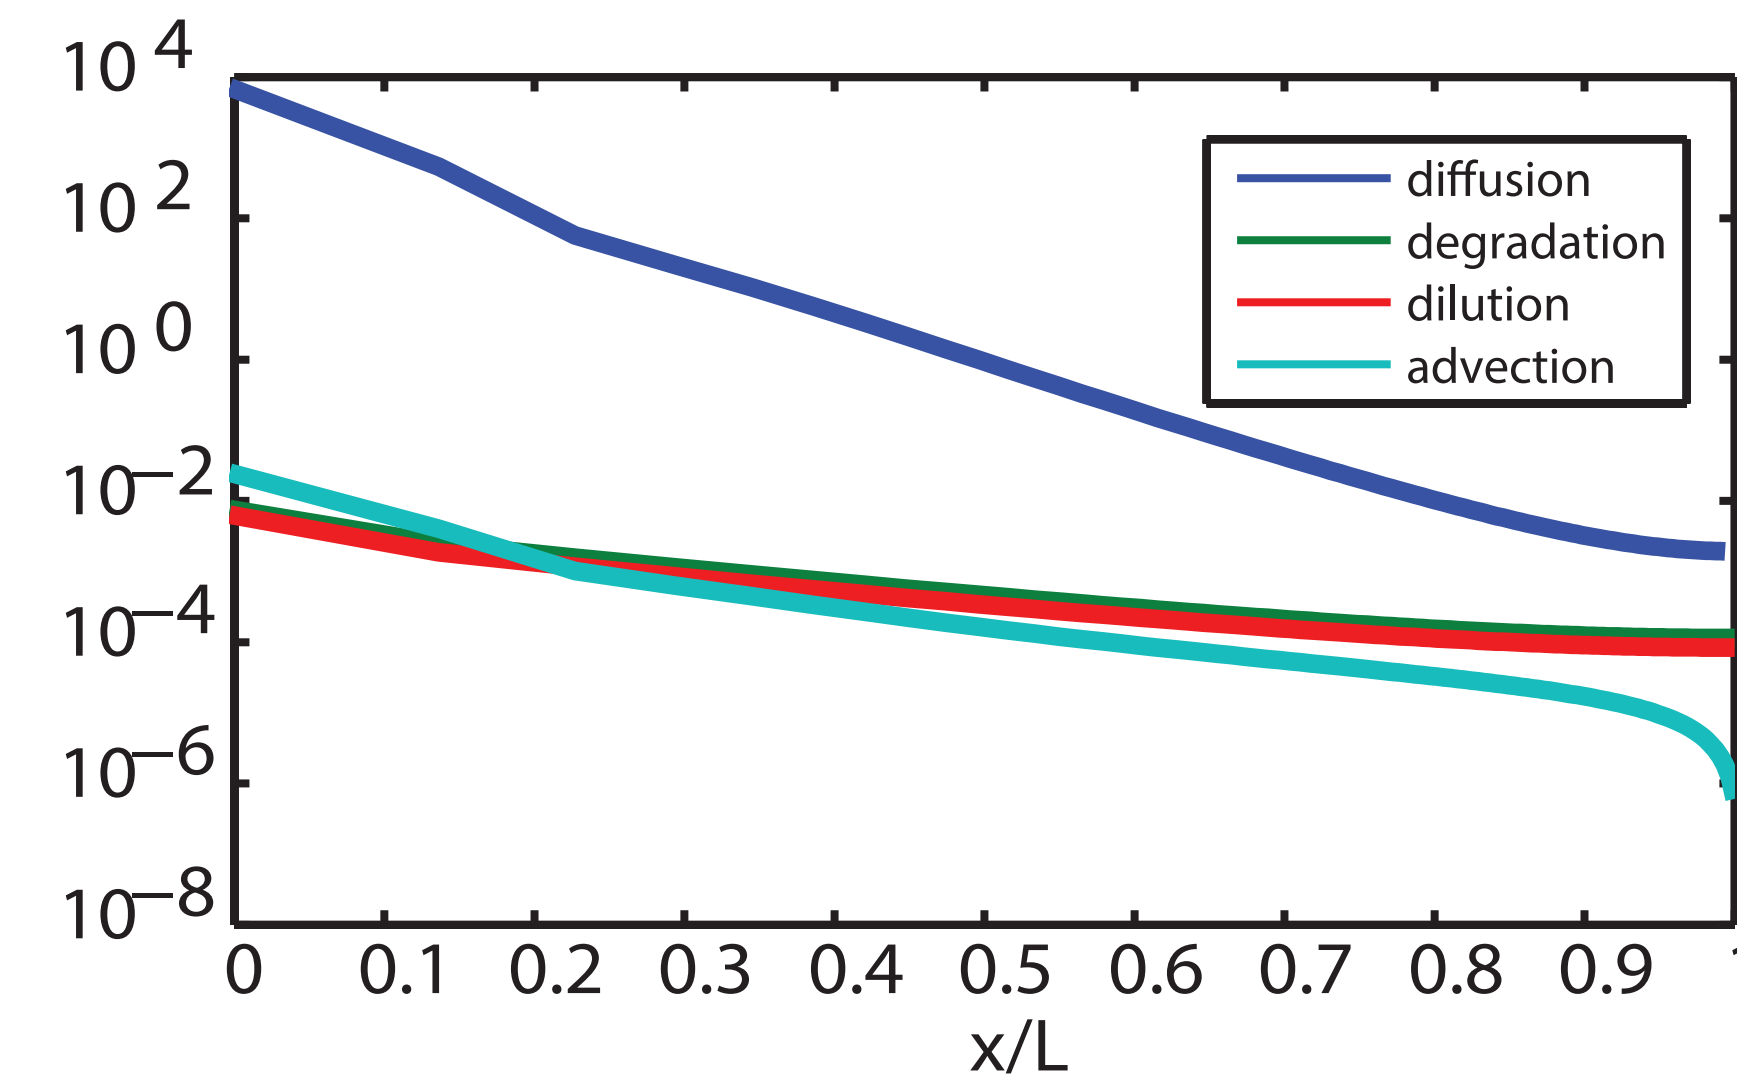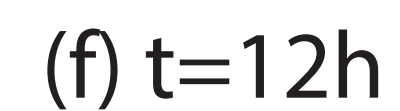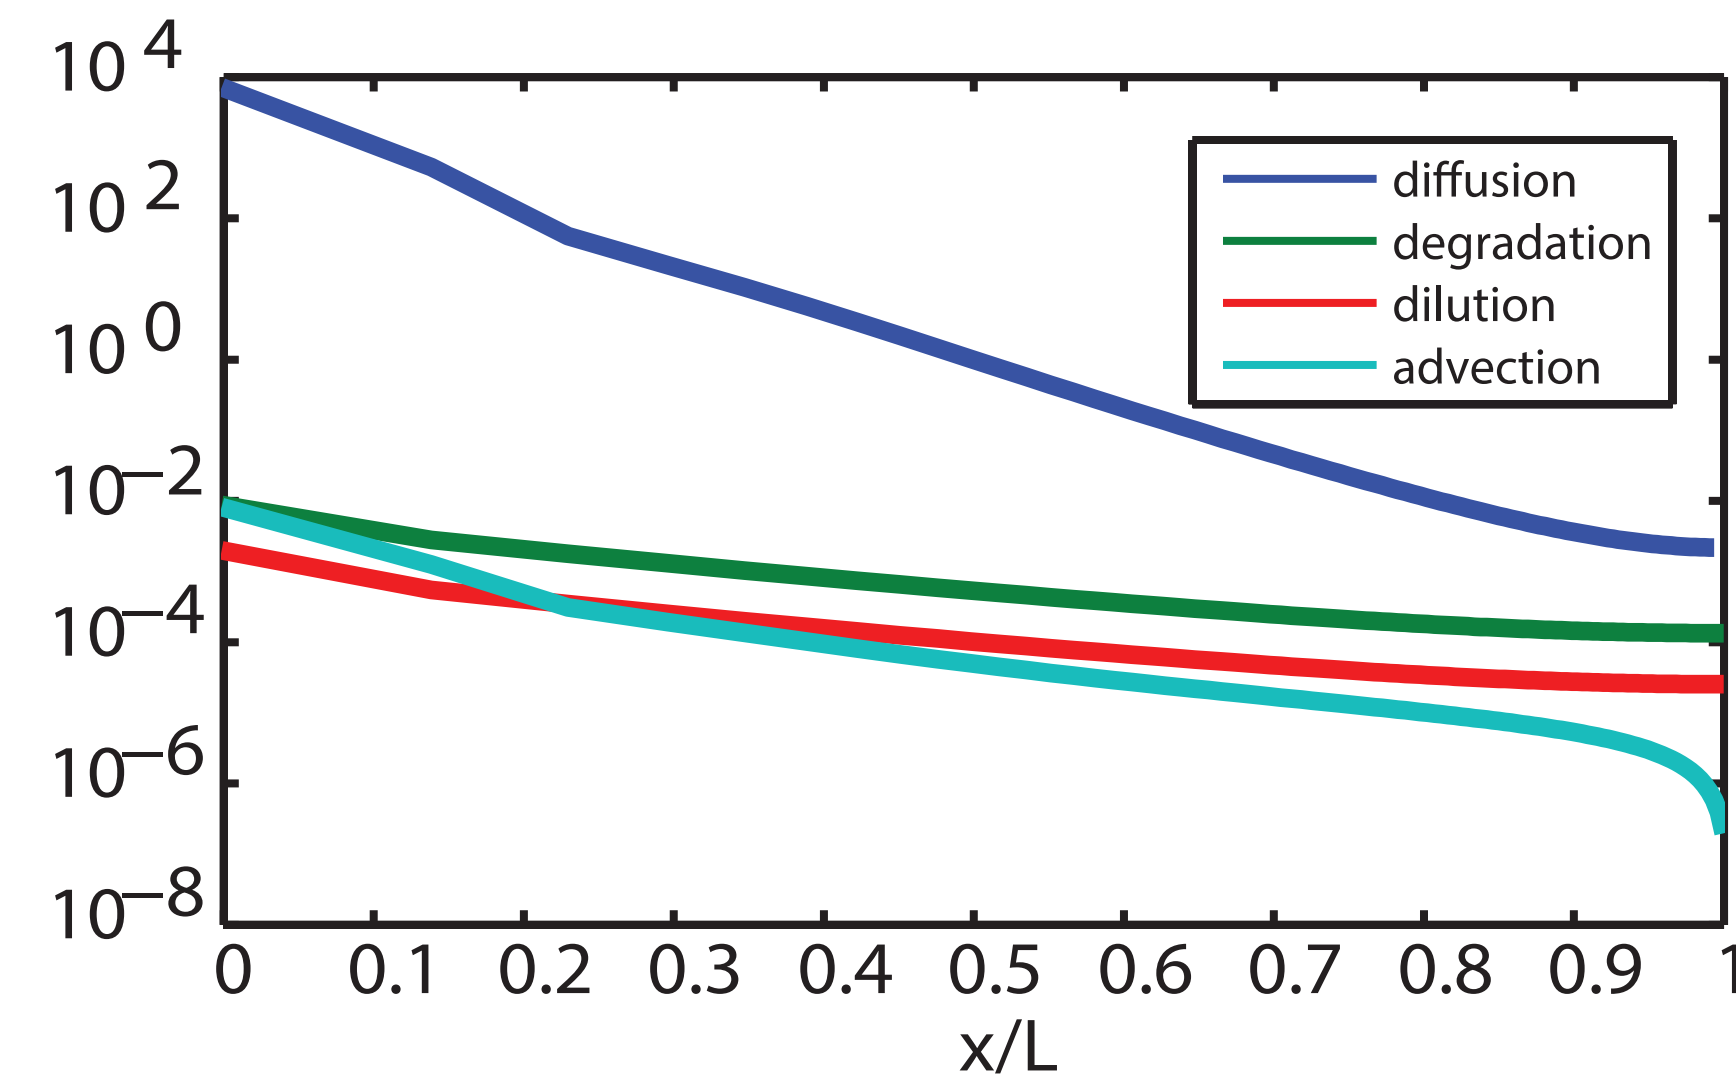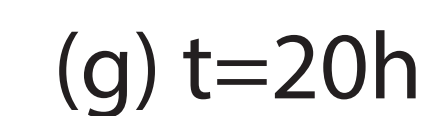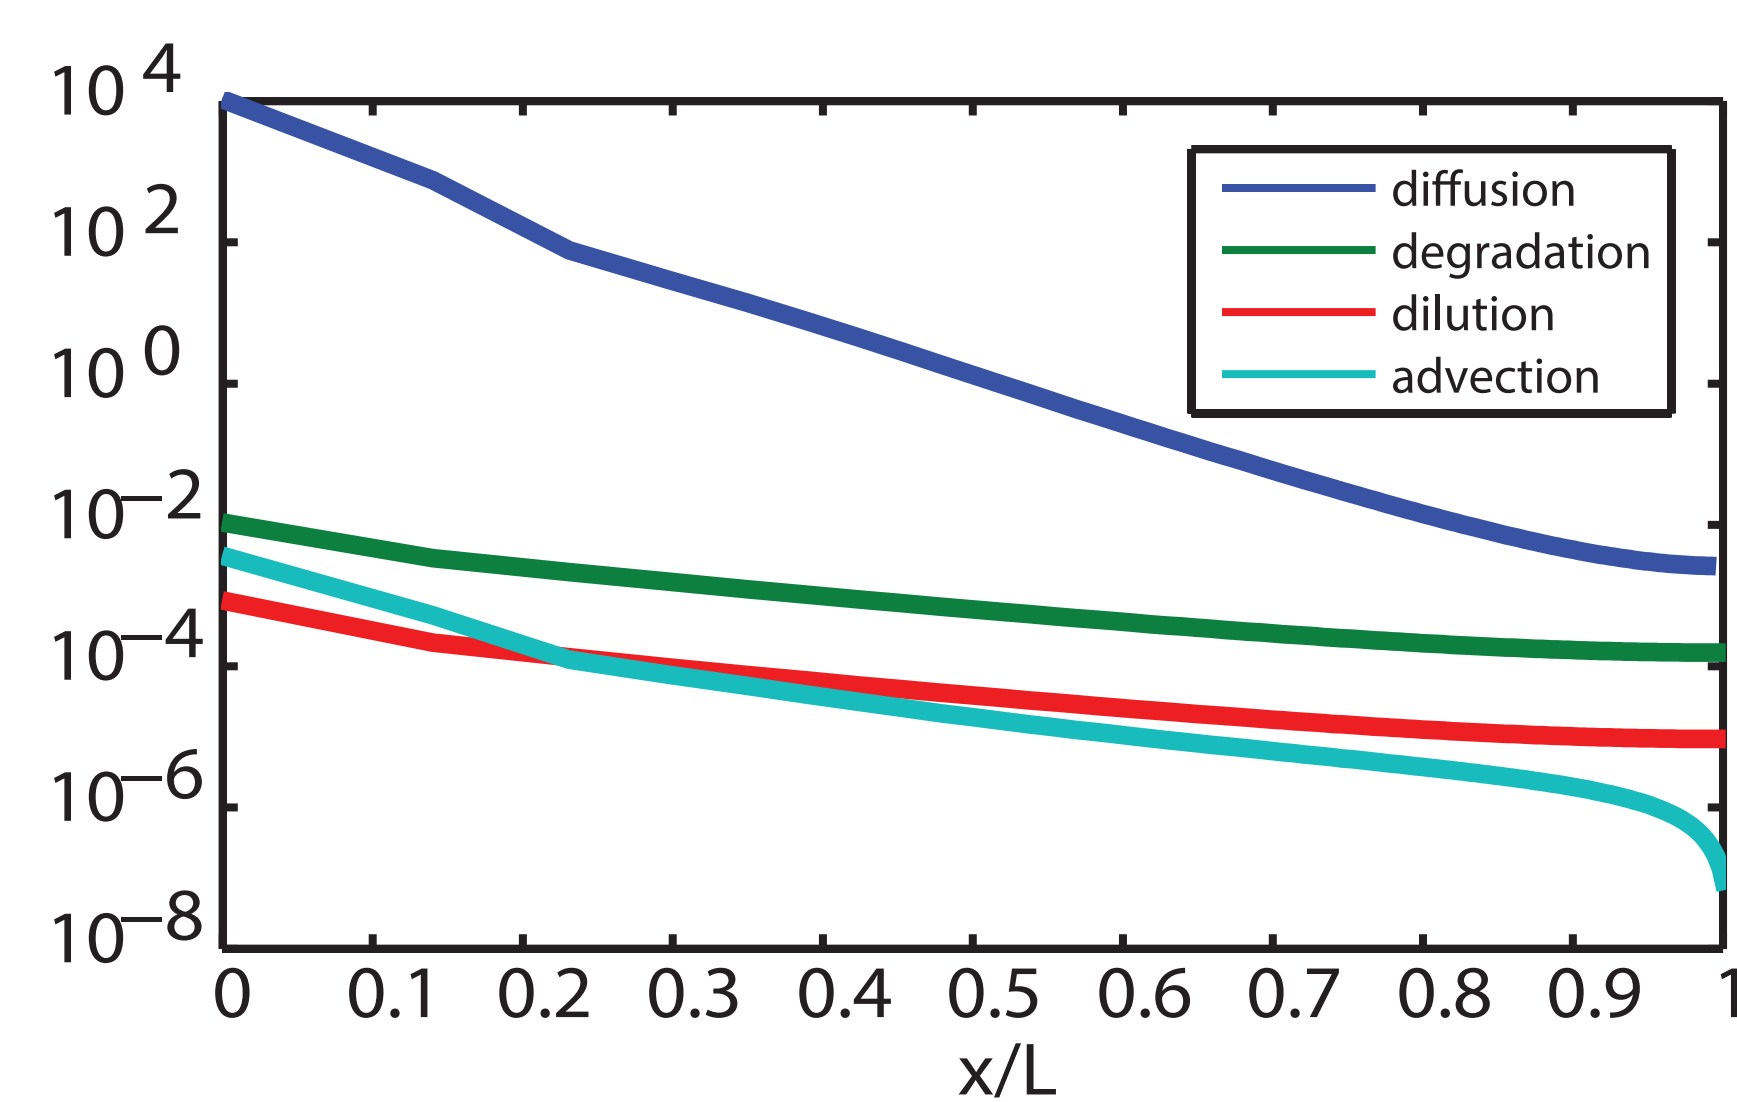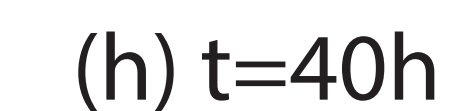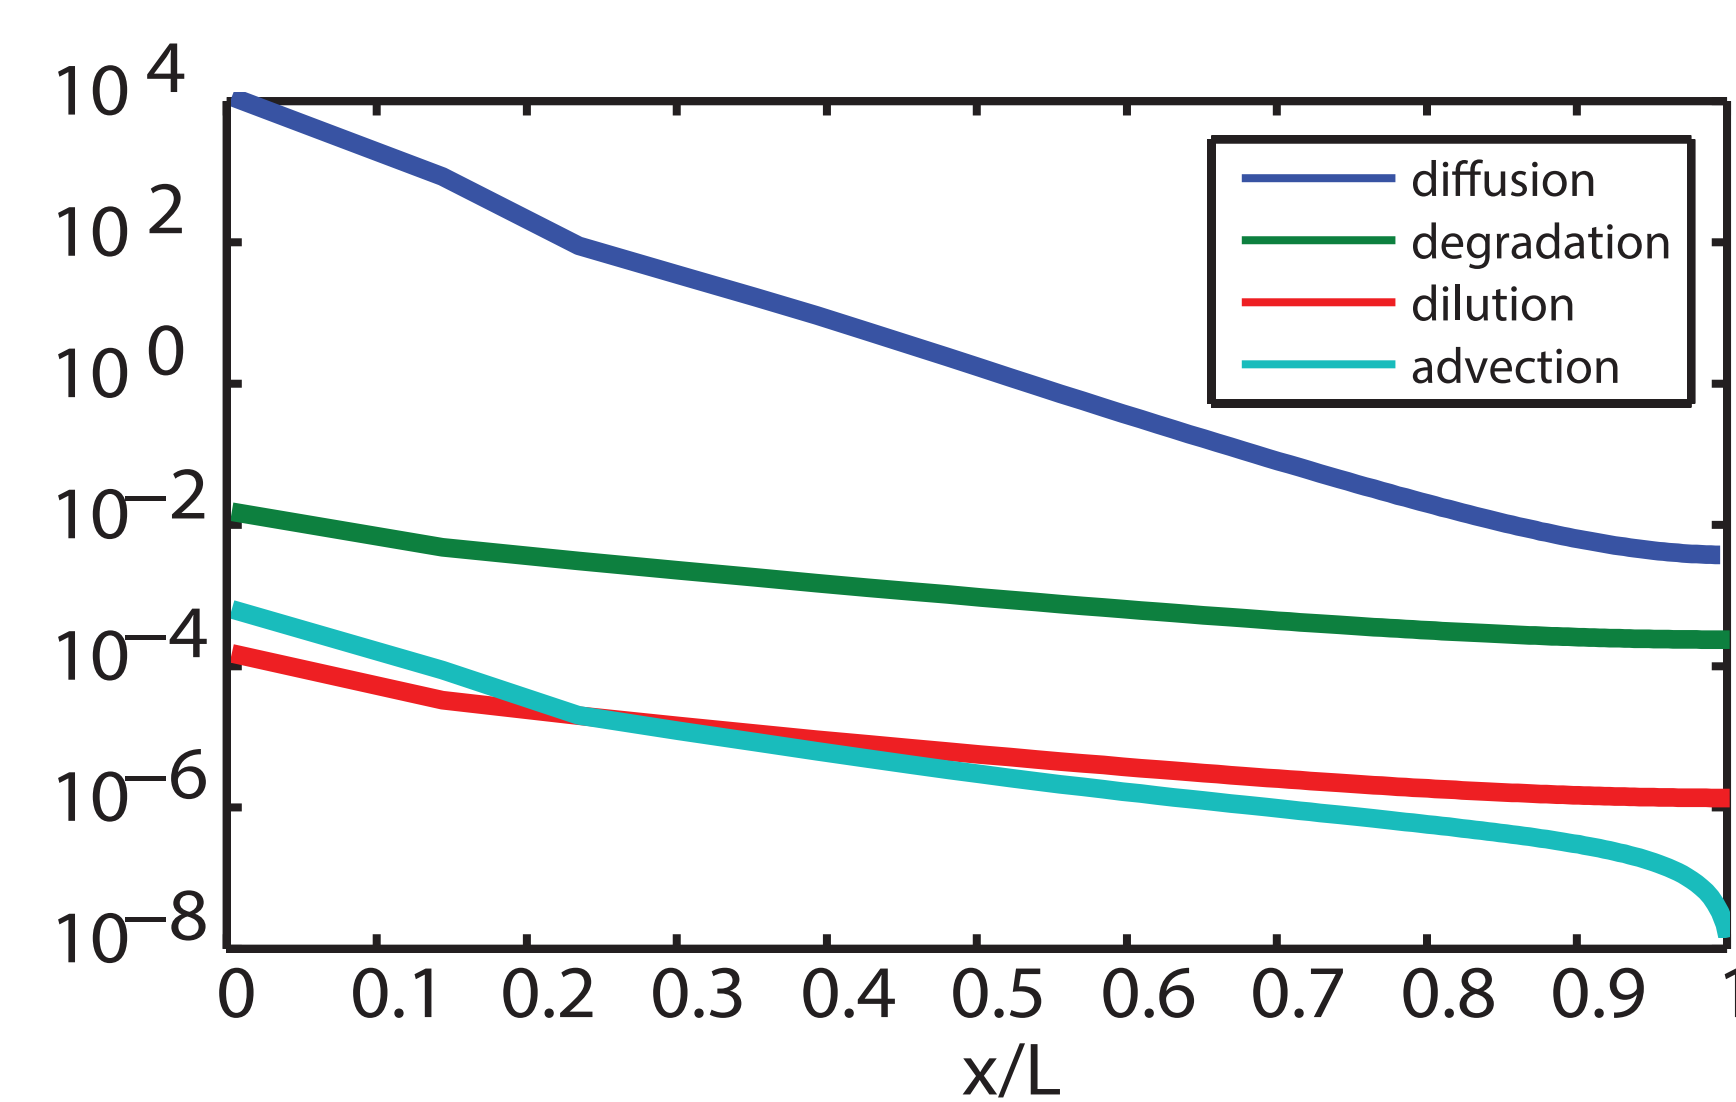

# Fig. S14

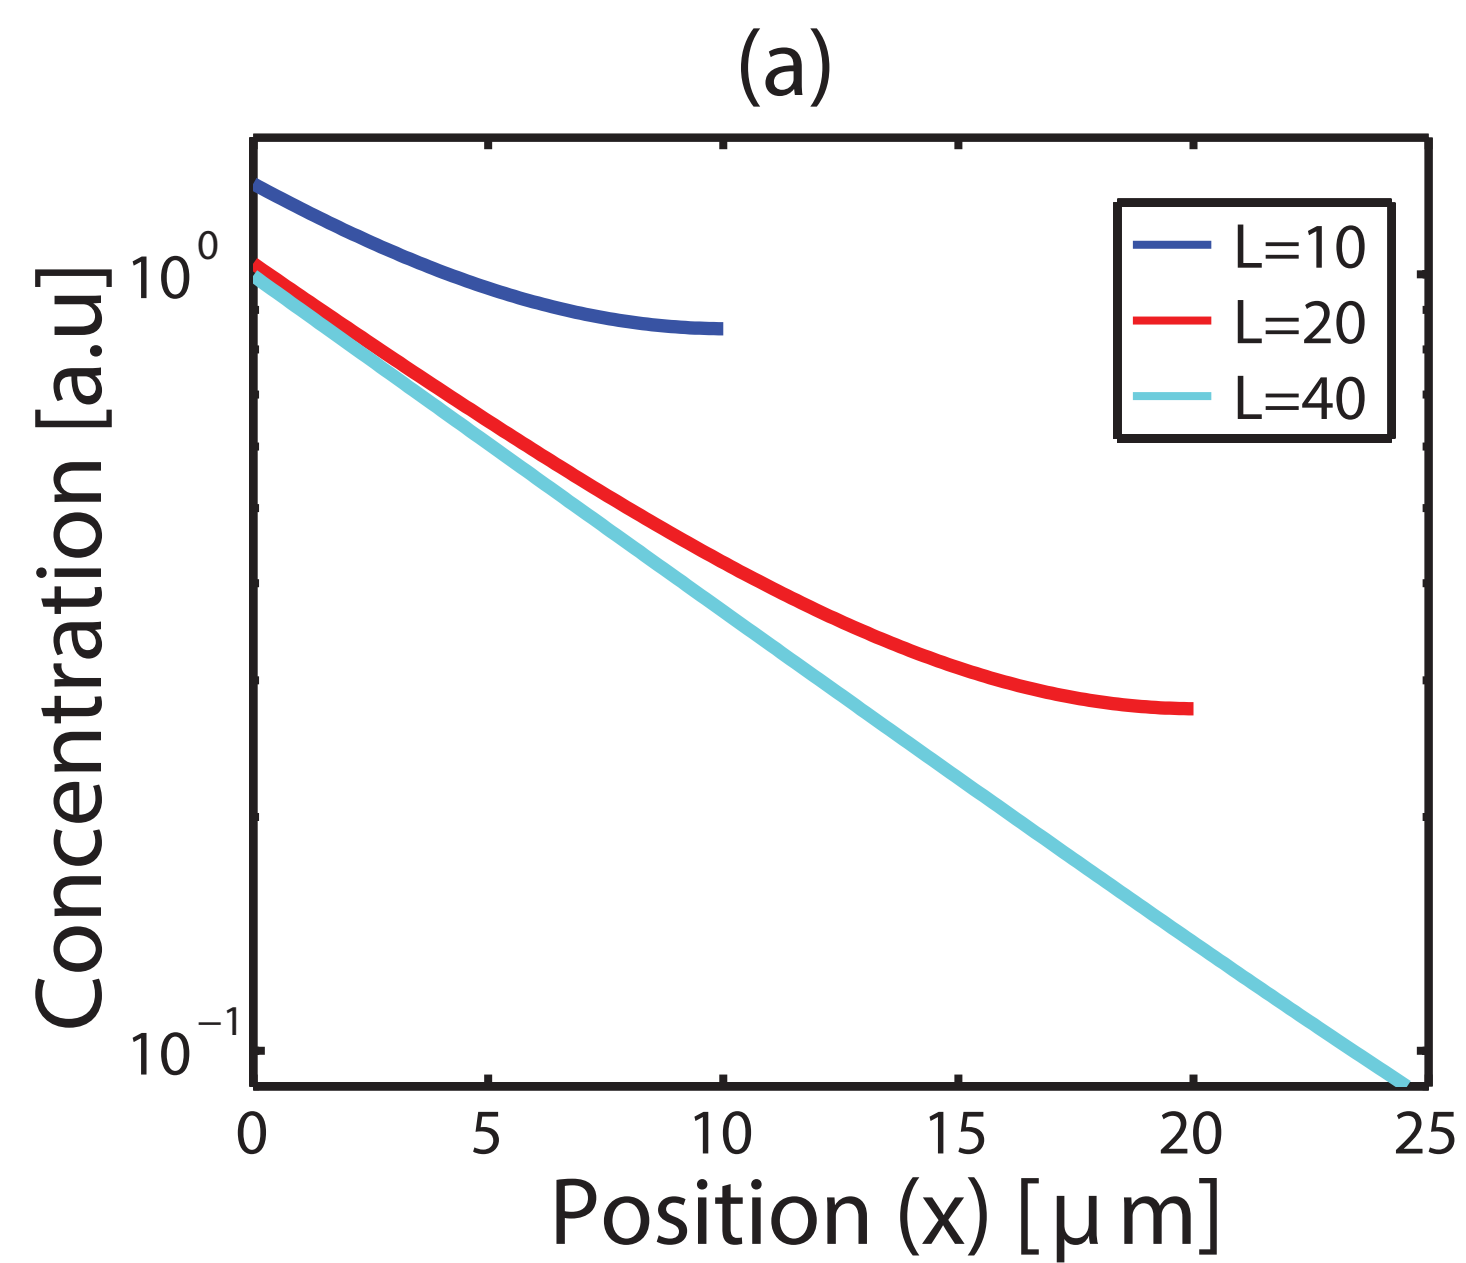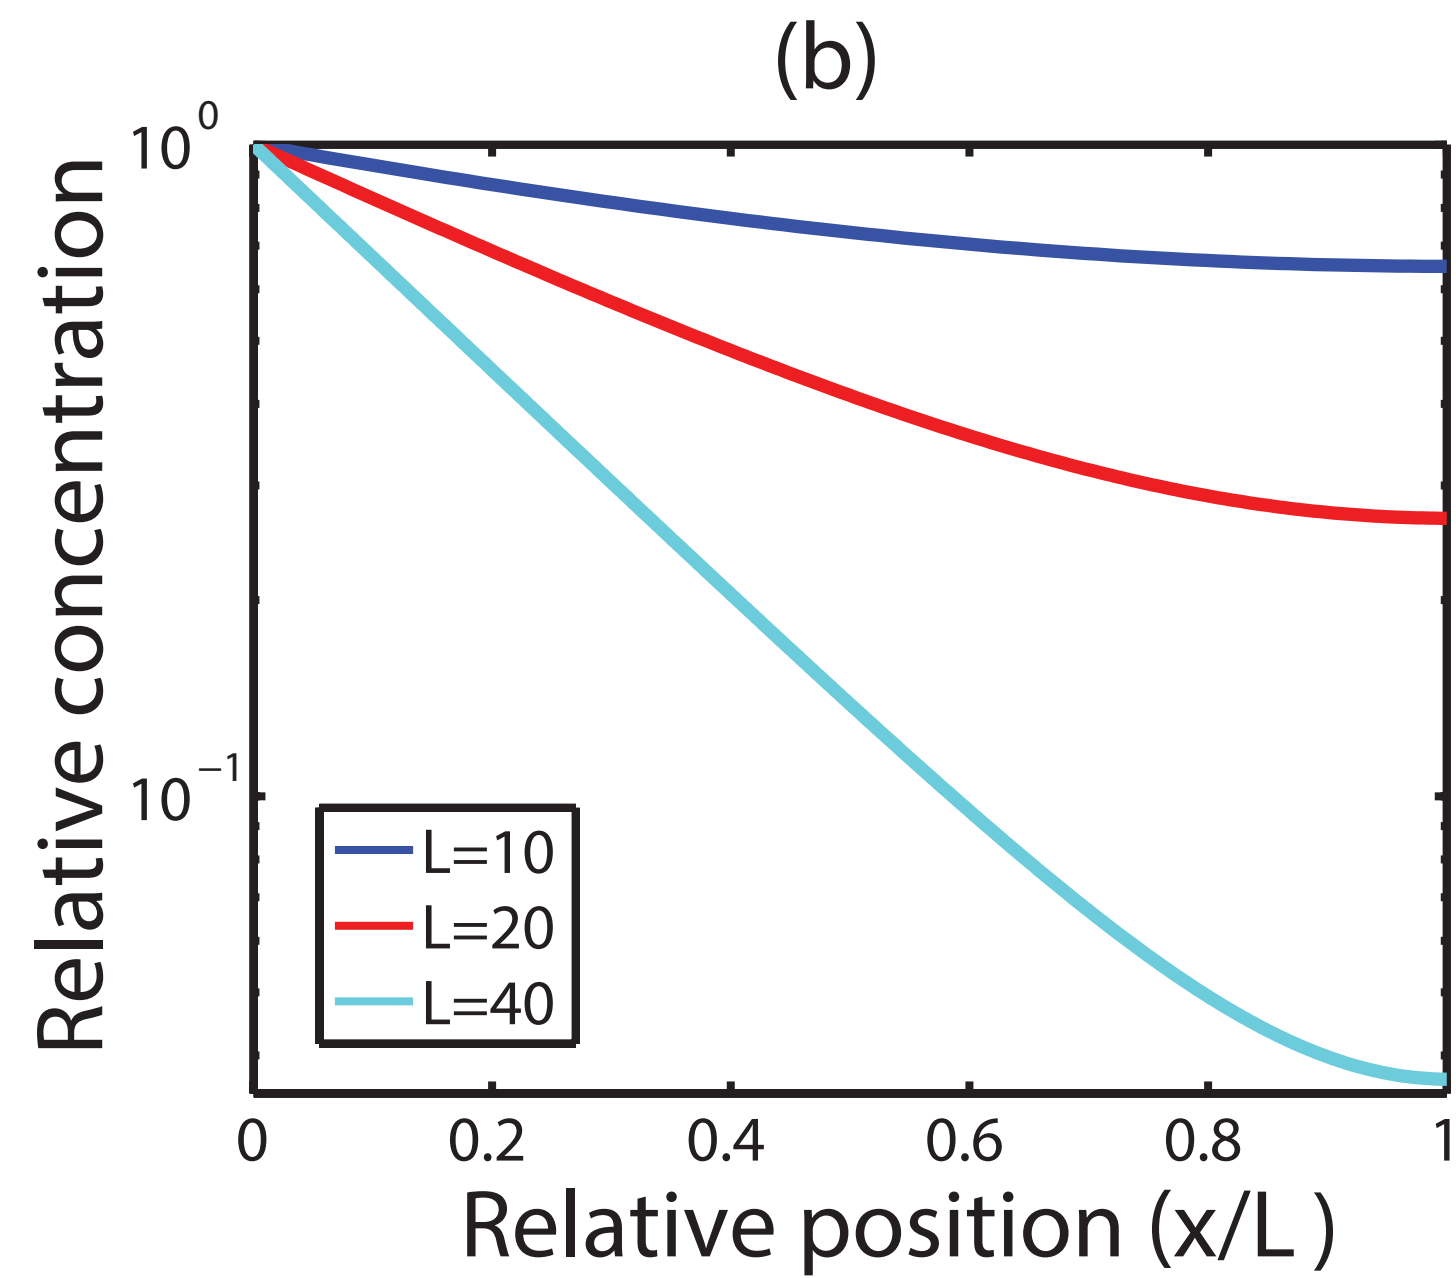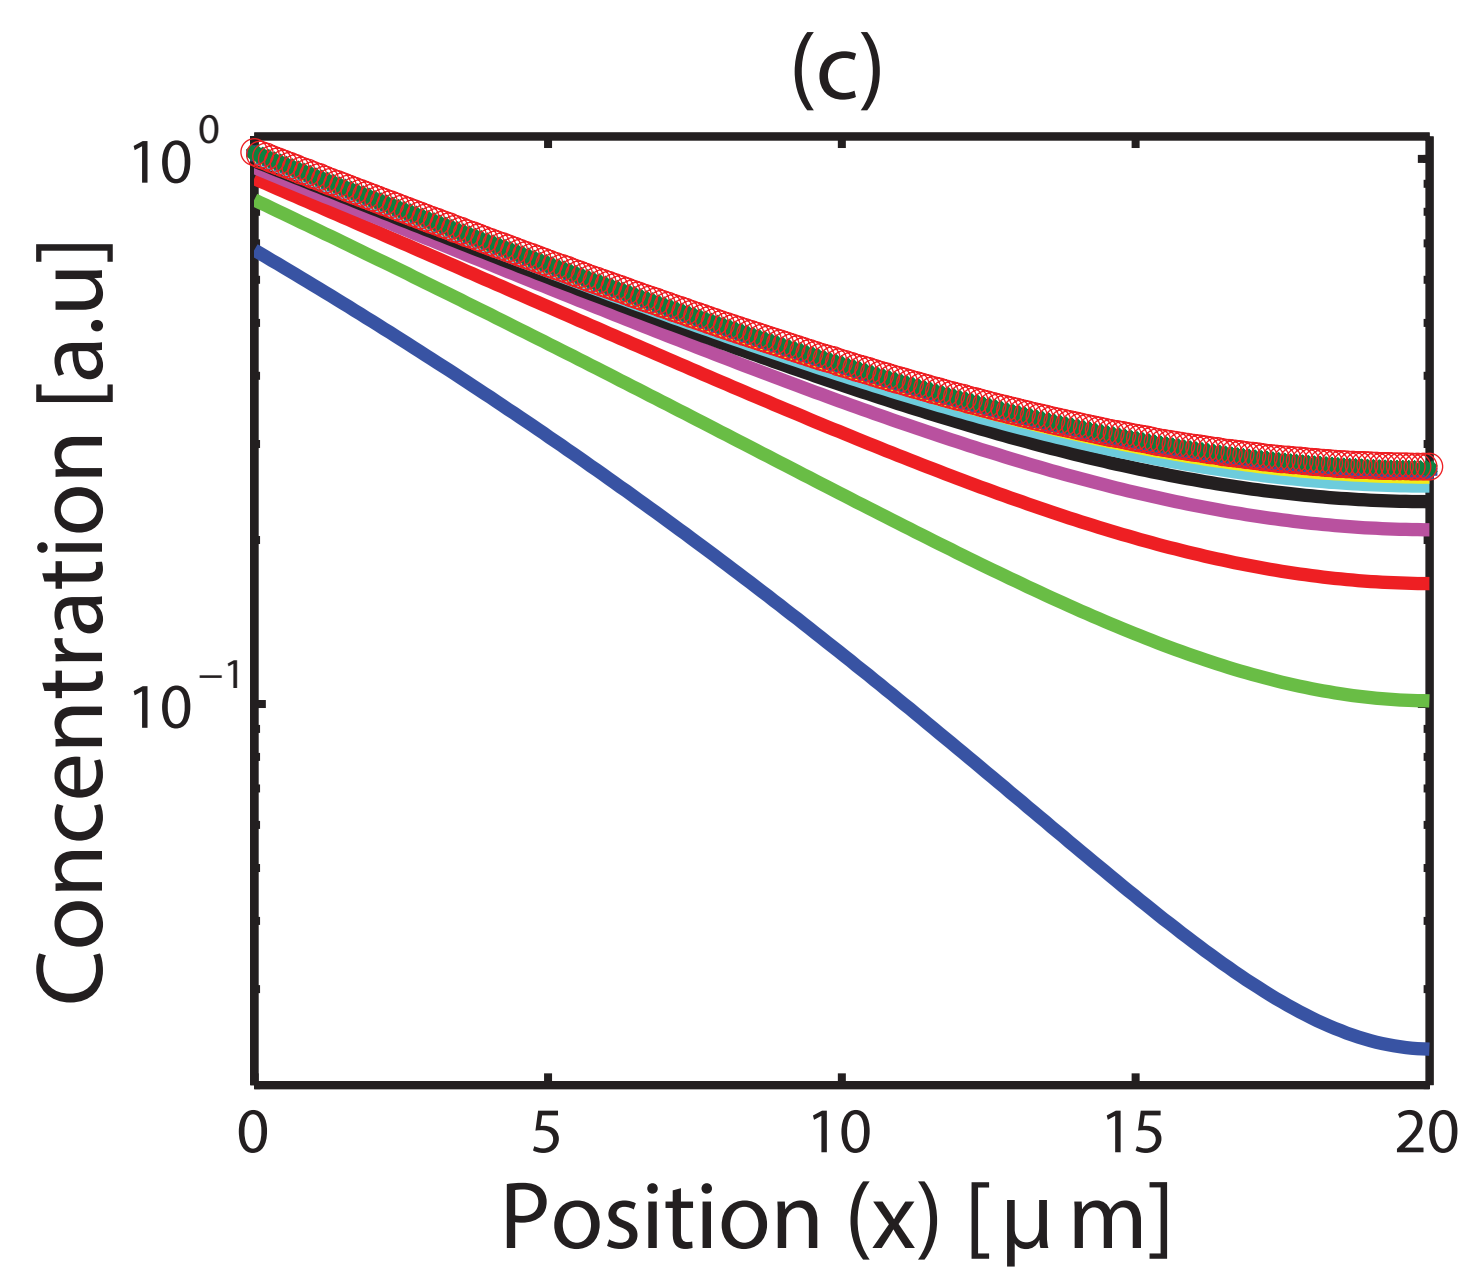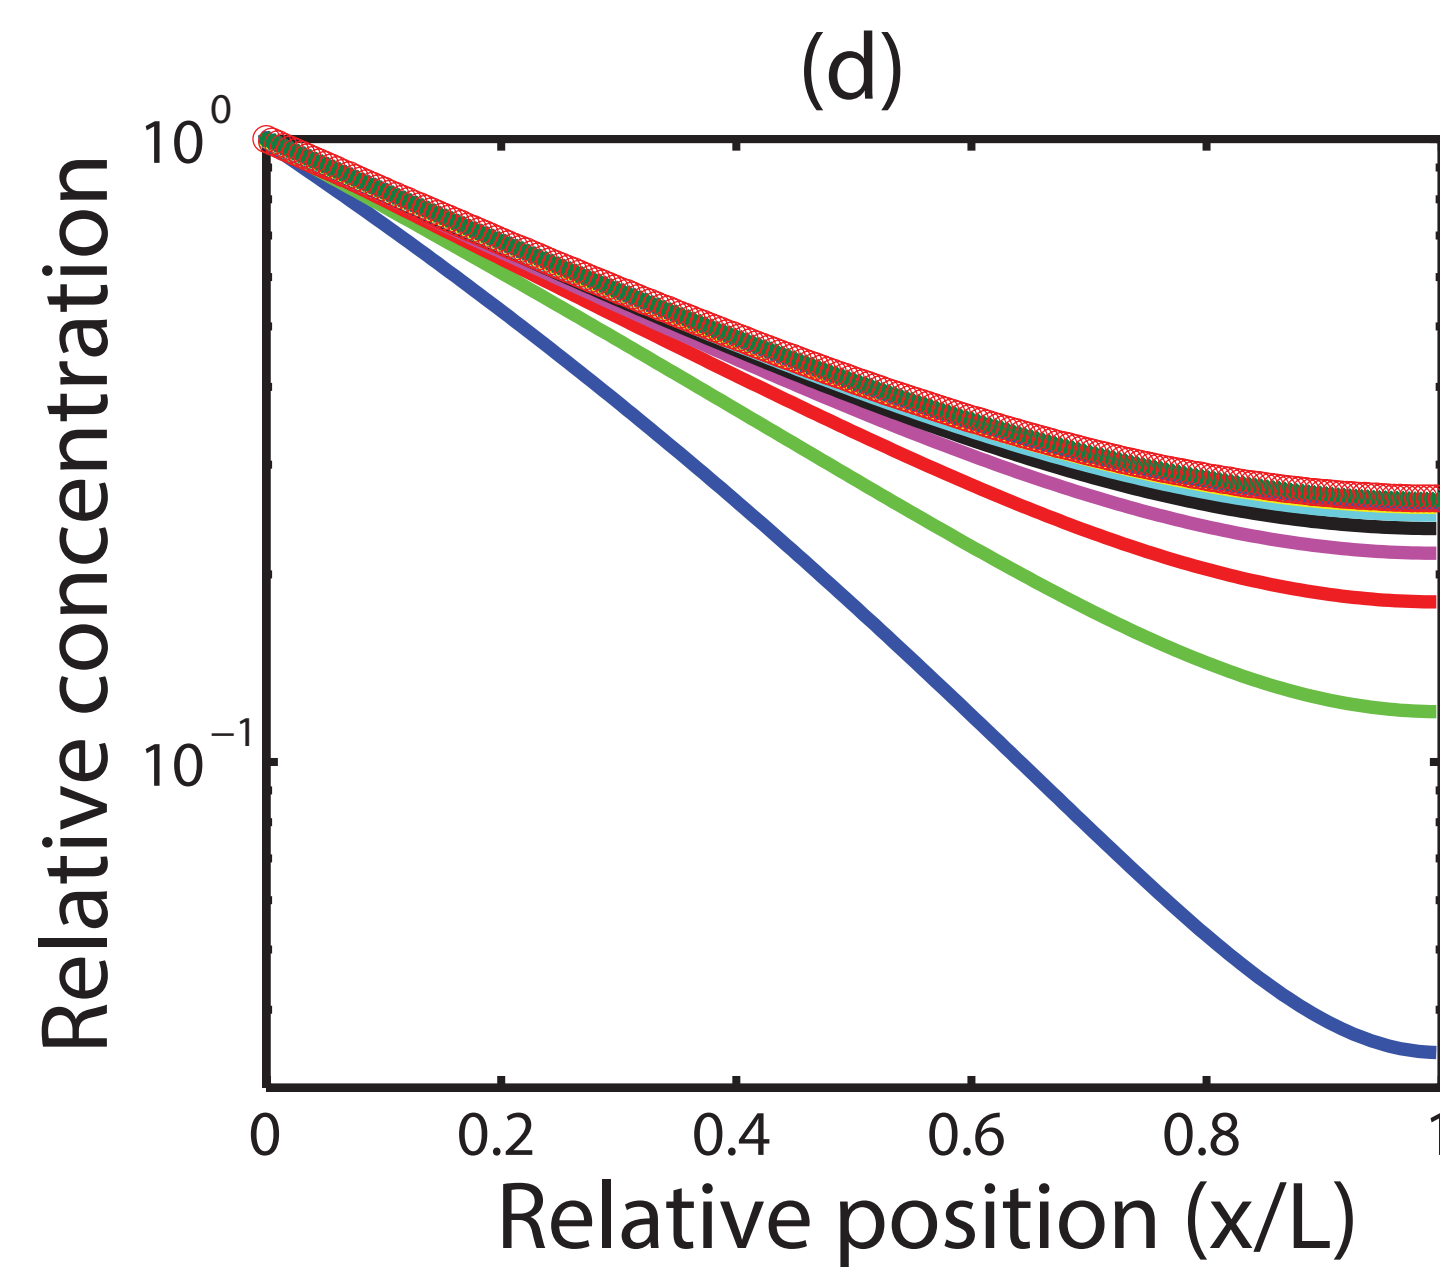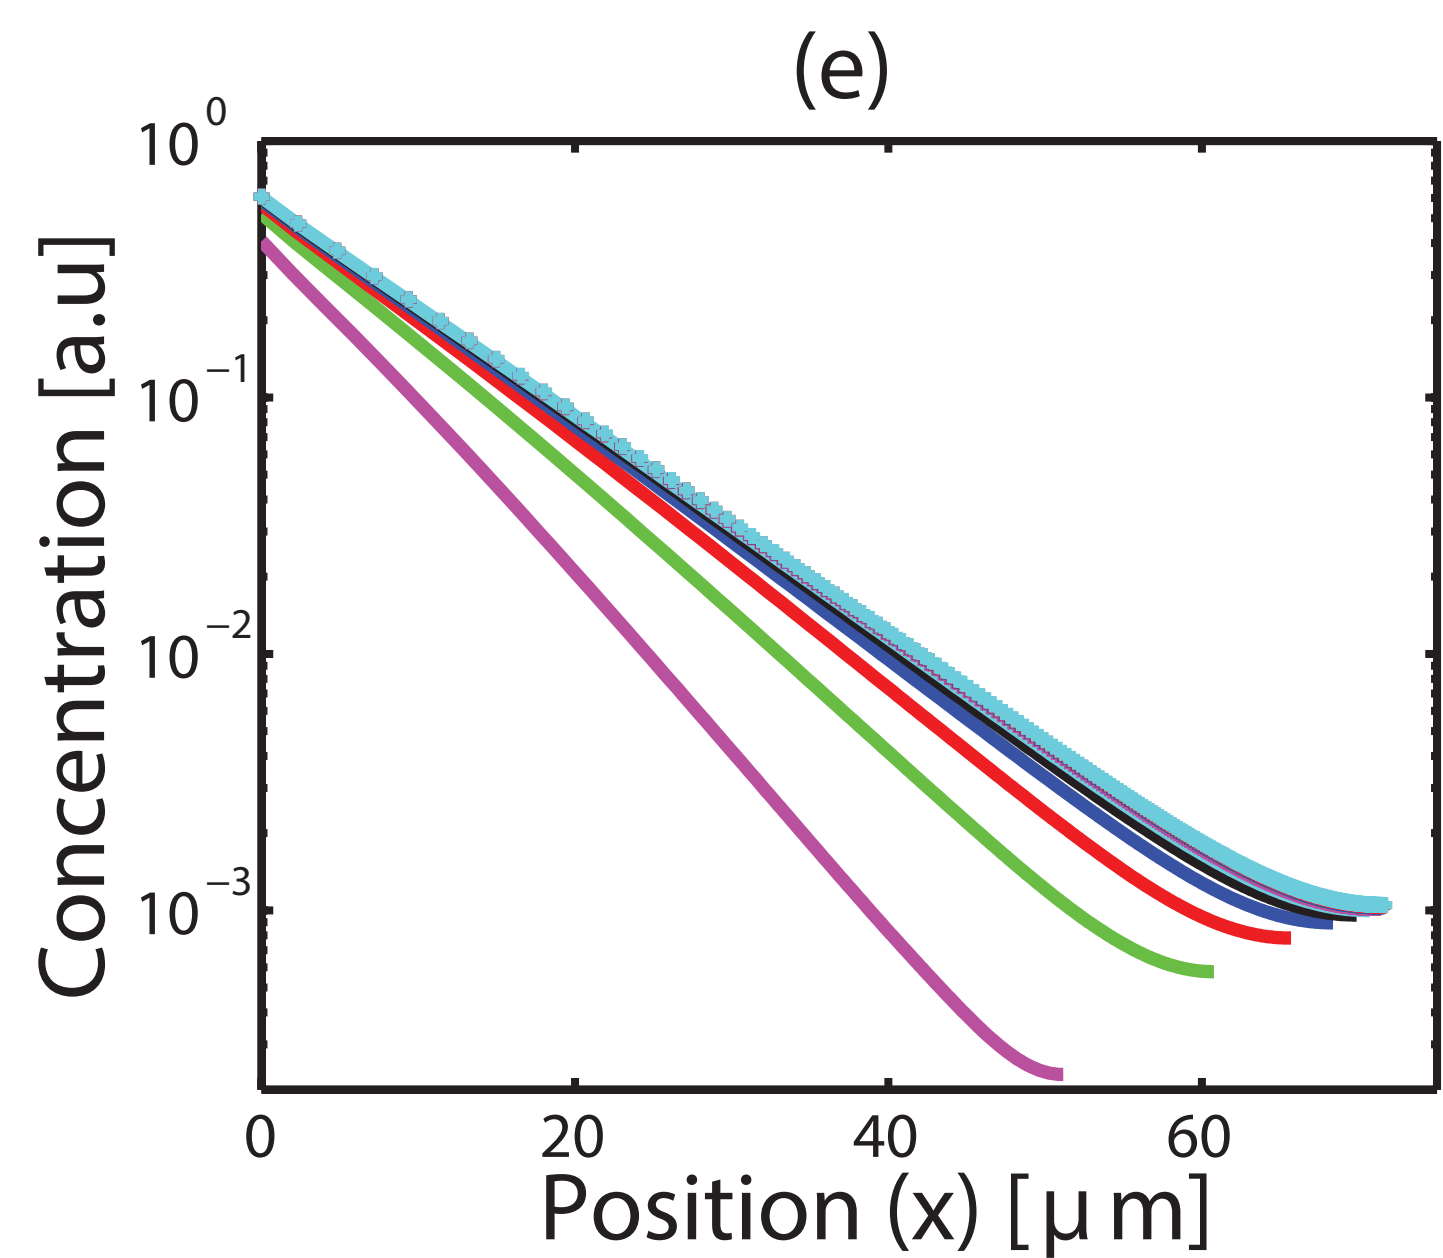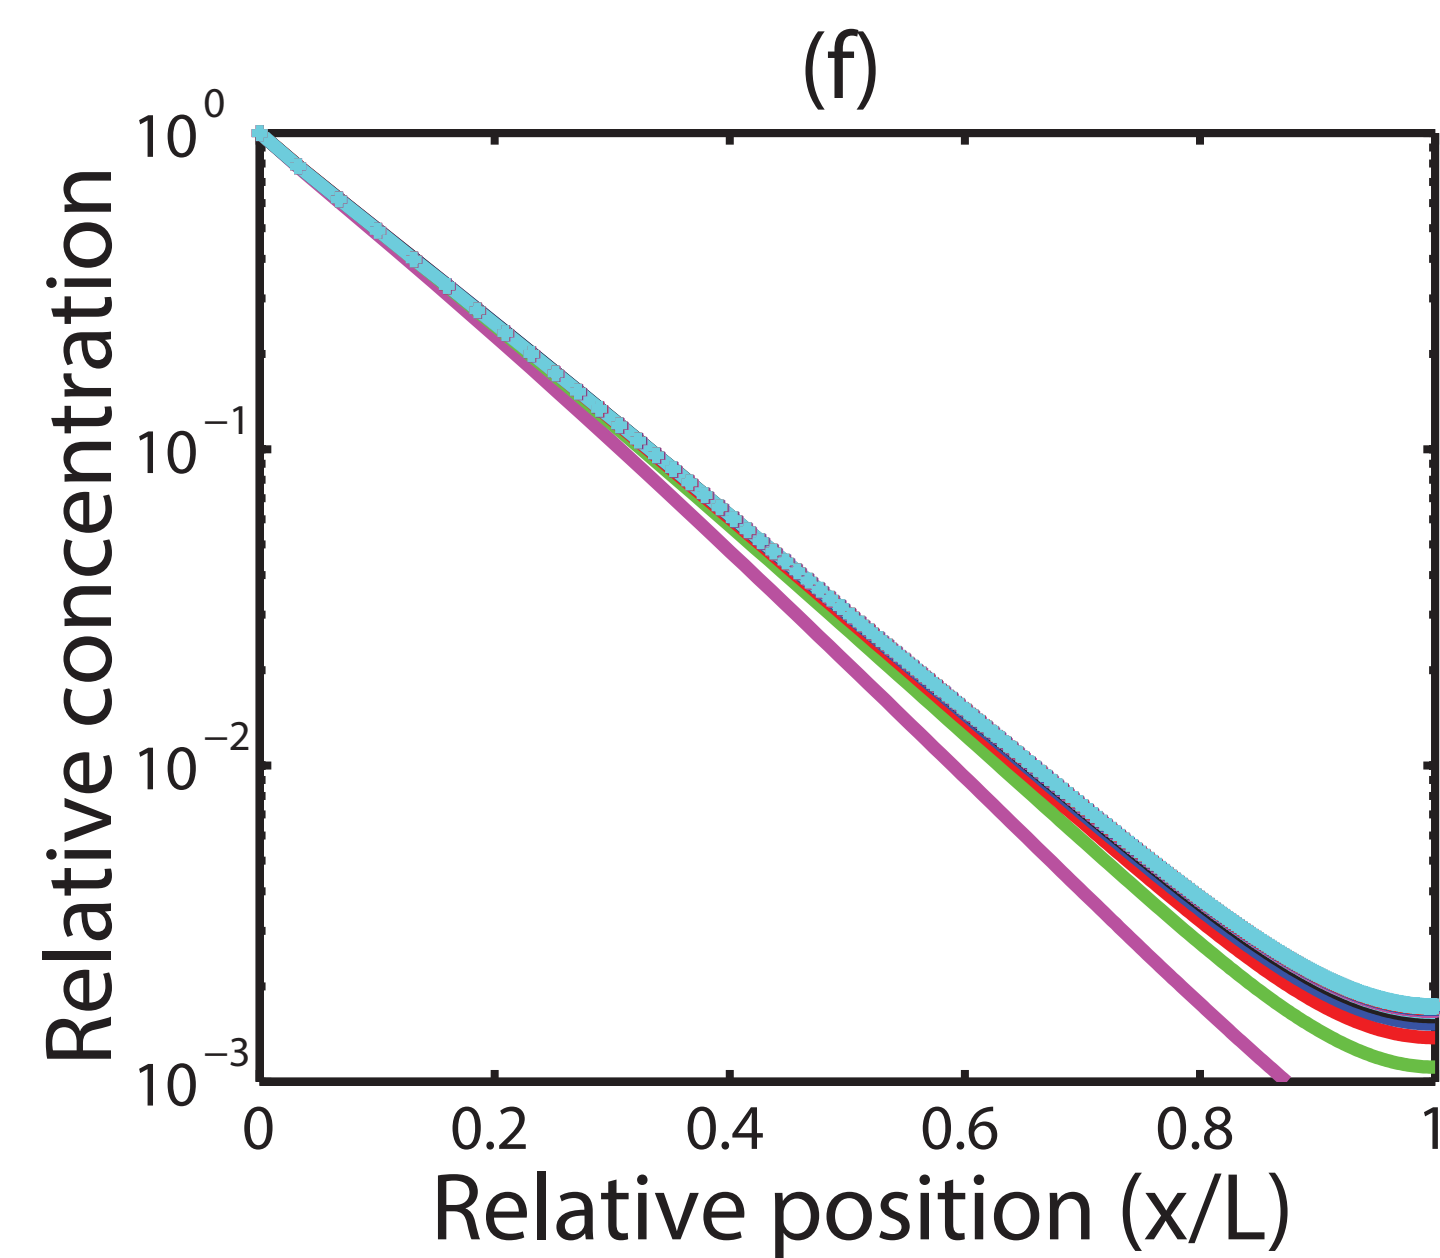

Fig. S15

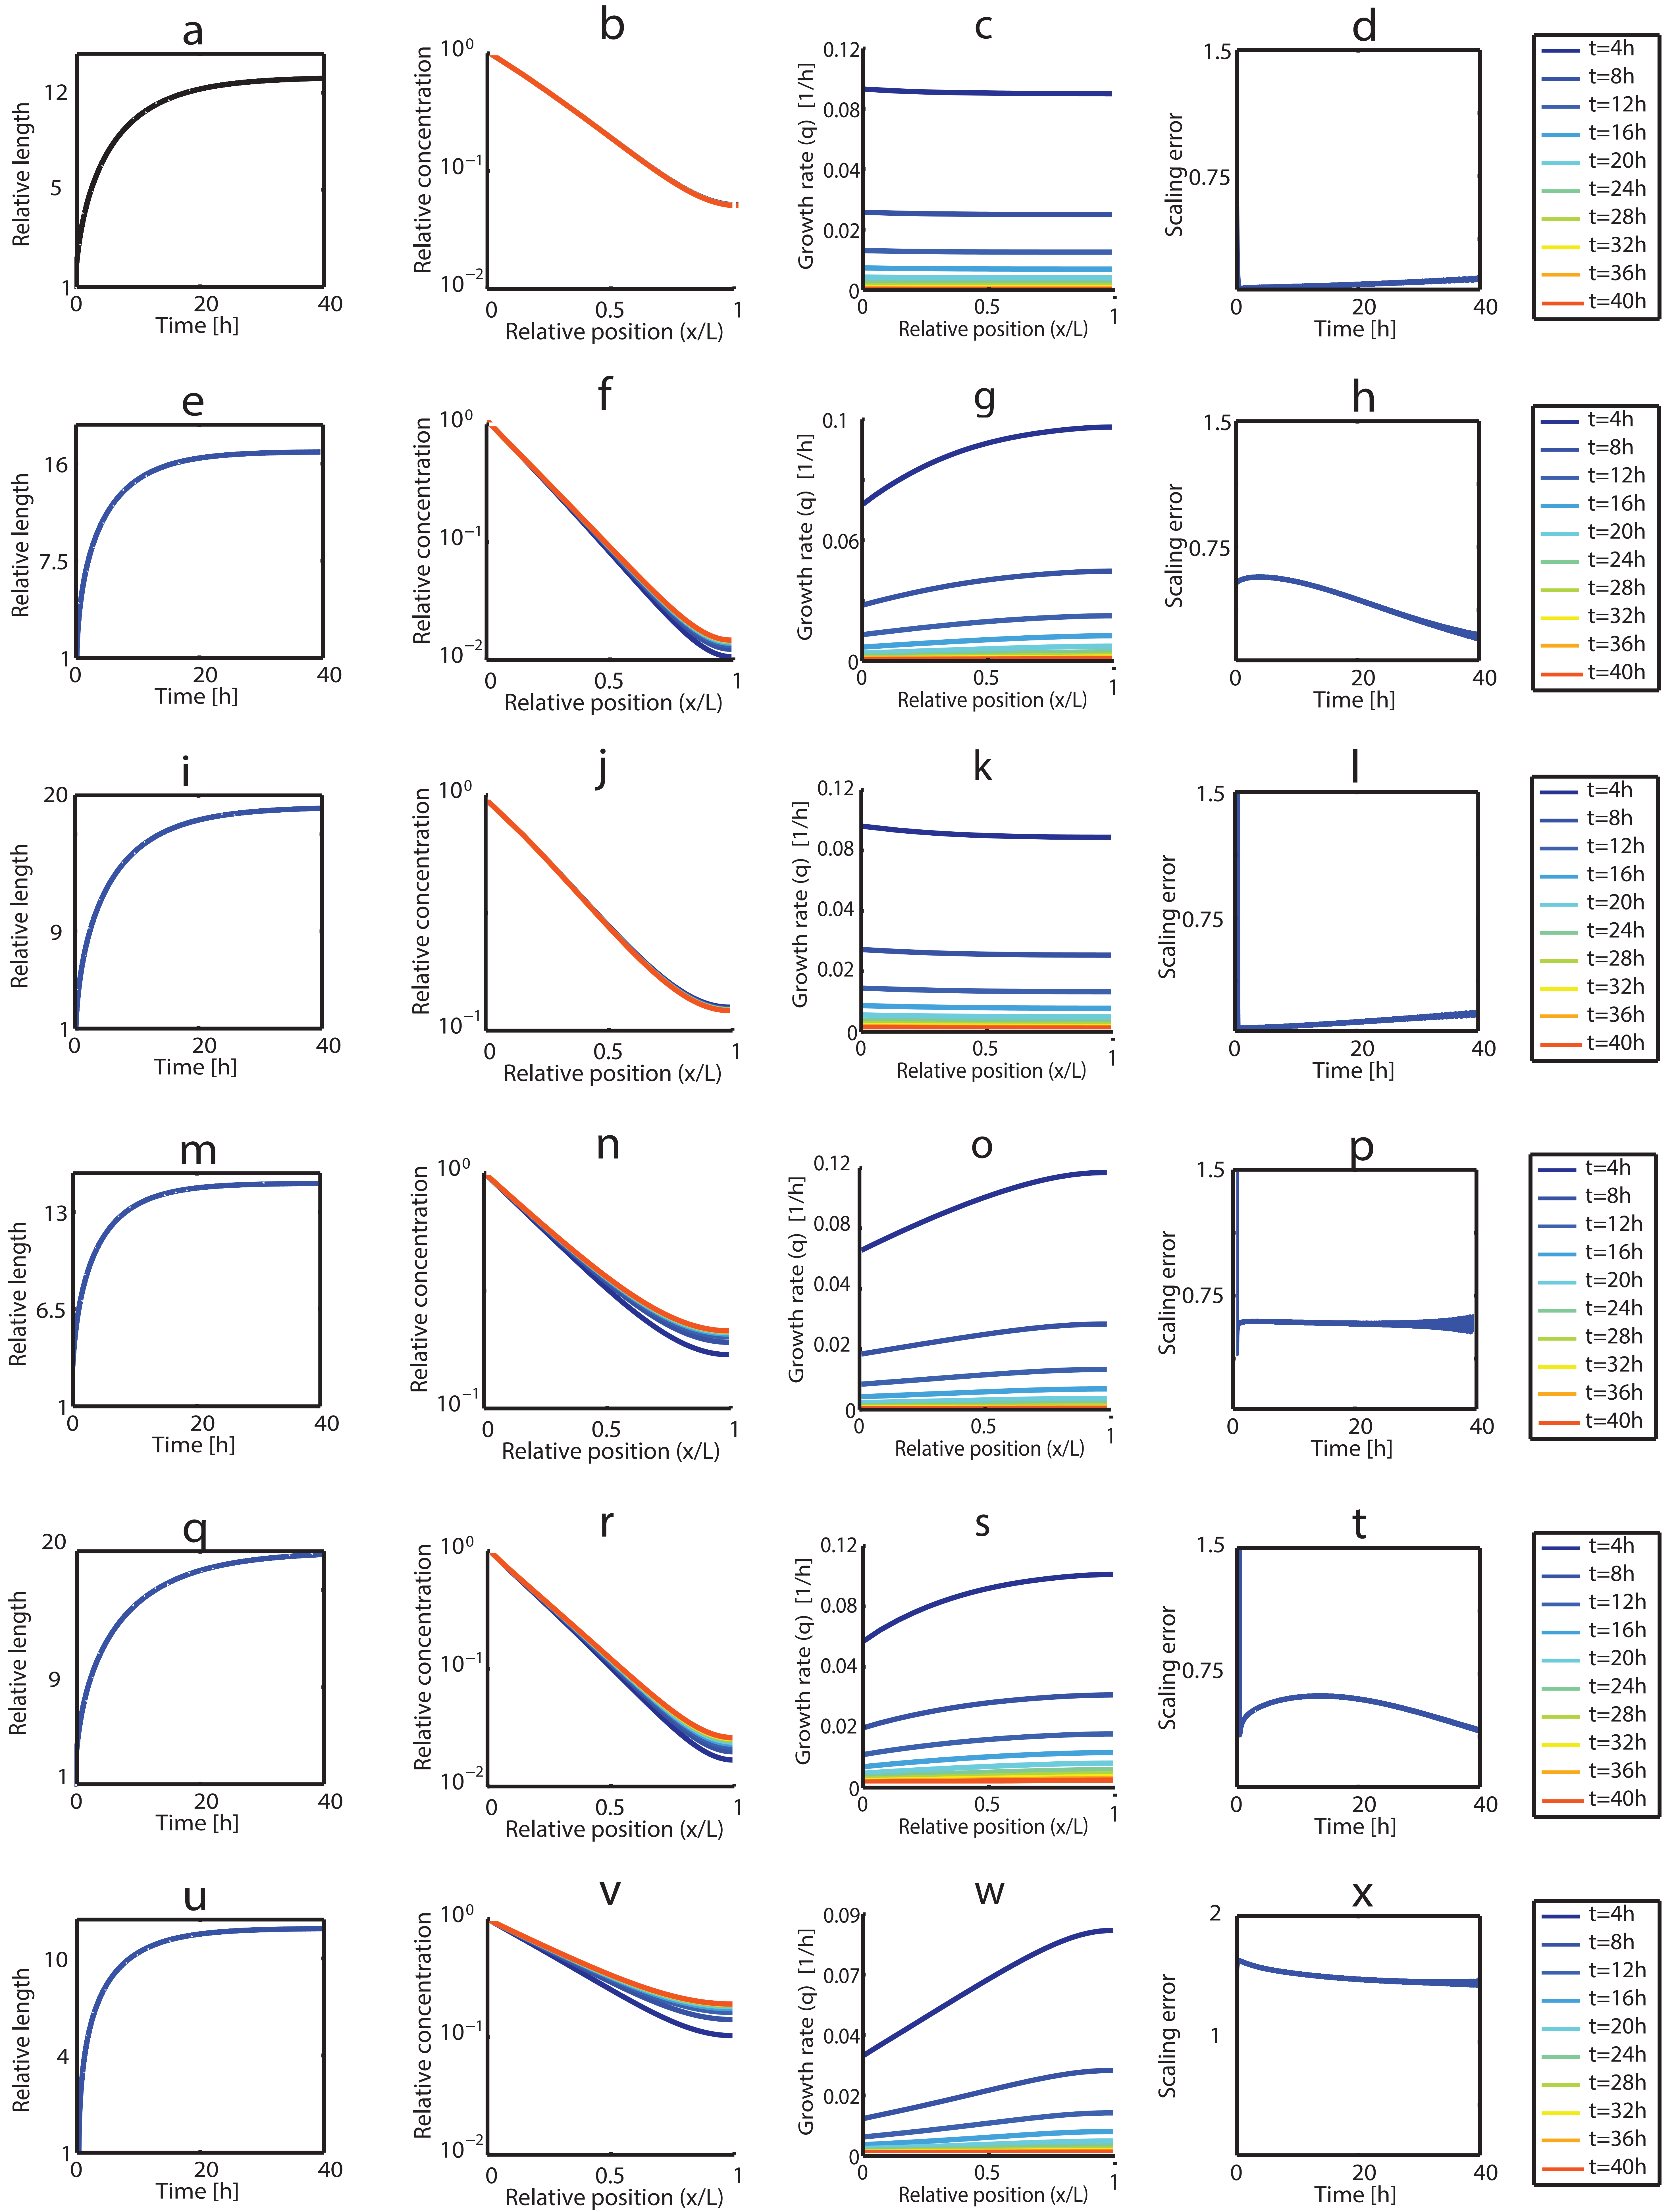

**Table S1. Scaling and uniform growth percentages for various simulation scenarios**

A

| <b>Increasing morphogen flux</b> | MDDR with ExR |
|----------------------------------|---------------|
| Final size                       | 100%          |
| Scaling                          | 100%          |
| Uniform growth                   | 98%           |
| Scaling and Uniform growth       | 98%           |

B

| <b>Increasing morphogen flux</b> | MDDR |
|----------------------------------|------|
| Final size                       | 100% |
| Scaling                          | 100% |
| Uniform growth                   | 100% |
| Scaling and Uniform growth       | 100% |

C

| <b>Absorbing B.C for morphogen</b> | MDDR with ExR |
|------------------------------------|---------------|
| Final size                         | 100%          |
| Scaling                            | 100%          |
| Uniform growth                     | 100%          |
| Scaling and Uniform growth         | 100%          |

D

| <b>Absorbing B.C for morphogen</b> | MDDR |
|------------------------------------|------|
| Final size                         | 100% |
| Scaling                            | 87%  |
| Uniform growth                     | 100% |
| Scaling and Uniform growth         | 87%  |

E

| <b>Nonlinear morphogen degradation</b> | MDDR with ExR |
|----------------------------------------|---------------|
| Final size                             | 100%          |
| Scaling                                | 100%          |
| Uniform growth                         | 43%           |
| Scaling and Uniform growth             | 43%           |

F

| <b>Nonlinear morphogen degradation</b> | MDDR |
|----------------------------------------|------|
| Final size                             | 100% |
| Scaling                                | 91%  |
| Uniform growth                         | 47%  |
| Scaling and Uniform growth             | 47%  |

G

| <b>Nonlinear expander degradation</b> | MDDR with ExR |
|---------------------------------------|---------------|
| Final size                            | 100%          |
| Scaling                               | 96%           |
| Uniform growth                        | 84%           |
| Scaling and Uniform growth            | 84%           |

H

| <b>Different forms of <math>h(M)</math> and <math>\alpha(E)</math></b> | MDDR with ExR |
|------------------------------------------------------------------------|---------------|
| Final size                                                             | 100%          |
| Scaling                                                                | 100%          |
| Uniform growth                                                         | 72%           |
| Scaling and Uniform growth                                             | 72%           |
